# Supplementary material for: Genome analysis reveals insights into physiology and longevity of the Brandt’s bat Myotis brandtii
Source: PubMed Central journal article supplement — Nat Commun. 2013 Aug 20;4:2212. doi: 10.1038/ncomms3212 (PMC3753542; doi:10.1038/ncomms3212), 2013-08-20
Supplement: ncomms3212-s1.pdf [file ncomms3212-s1.pdf]

## Genome analysis reveals insights into physiology and longevity of the Brandt's bat *Myotis brandtii*

Inge Seim<sup>1,2,\*</sup>, Xiaodong Fang<sup>3,4,\*</sup>, Zhiqiang Xiong<sup>3</sup>, Alexey V. Lobanov<sup>1</sup>, Zhiyong Huang<sup>3</sup>, Siming Ma<sup>1</sup>, Yue Feng<sup>3</sup>, Anton A. Turanov<sup>1</sup>, Yabing Zhu<sup>3</sup>, Tobias L. Lenz<sup>1</sup>, Maxim V. Gerashchenko<sup>1,5</sup>, Dingding Fan<sup>3</sup>, Sun Hee Yim<sup>1</sup>, Xiaoming Yao<sup>3</sup>, Daniel Jordan<sup>1</sup>, Yingqi Xiong<sup>3</sup>, Yong Ma<sup>3</sup>, Andrey N. Lyapunov<sup>6</sup>, Guanxing Chen<sup>3</sup>, Oksana I. Kulakova<sup>7</sup>, Yudong Sun<sup>3</sup>, Sang-Goo Lee<sup>2</sup>, Roderick T. Bronson<sup>8</sup>, Alexey A. Moskalev<sup>7,9,10</sup>, Shamil R. Sunyaev<sup>1</sup>, Guojie Zhang<sup>3</sup>, Anders Krogh<sup>4</sup>, Jun Wang<sup>3,4,11,#</sup>, Vadim N. Gladyshev<sup>1,2,#</sup>

<sup>1</sup> Division of Genetics, Department of Medicine, Brigham and Women's Hospital, Harvard Medical School, Boston, MA, 02115, USA

<sup>2</sup> Department of Bioinspired Science, Ewha Womans University, Seoul, 120-750, South Korea

<sup>3</sup> BGI-Shenzhen, Shenzhen, 518083, China

<sup>4</sup> Novo Nordisk Foundation Center for Basic Metabolic Research, University of Copenhagen, Copenhagen, DK-2200 Copenhagen N, Denmark

<sup>5</sup> University of Nebraska, Lincoln, NE, 68588, USA

<sup>6</sup> Kirov State Center for Distance Education of Children, Kirov, 610006, Russia

<sup>7</sup> Institute of Biology, Komi Science Center, Russian Academy of Sciences, Syktyvkar, 167982, Russia

<sup>8</sup> Rodent Histopathology Laboratory, Harvard Medical School, Boston, MA 02115, USA

<sup>9</sup> Syktyvkar State University, Syktyvkar, 167001, Russia

<sup>10</sup> Moscow Institute of Physics and Technology, Dolgoprudny, Moscow Region, 141700, Russia

<sup>11</sup> Department of Biology, University of Copenhagen, Copenhagen, DK-2200 Copenhagen N, Denmark

\* equal contribution

# corresponding authors. Contact information: [vgladyshev@rics.bwh.harvard.edu](mailto:vgladyshev@rics.bwh.harvard.edu)

## SUPPLEMENTARY FIGURES

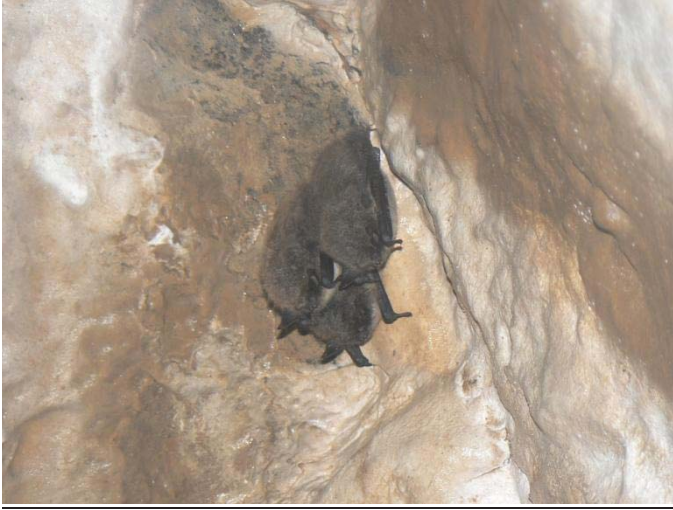

Supplementary Figure S1 | Hibernating *M. brandtii* at sampling site, Obvalnaya cave, Russia.

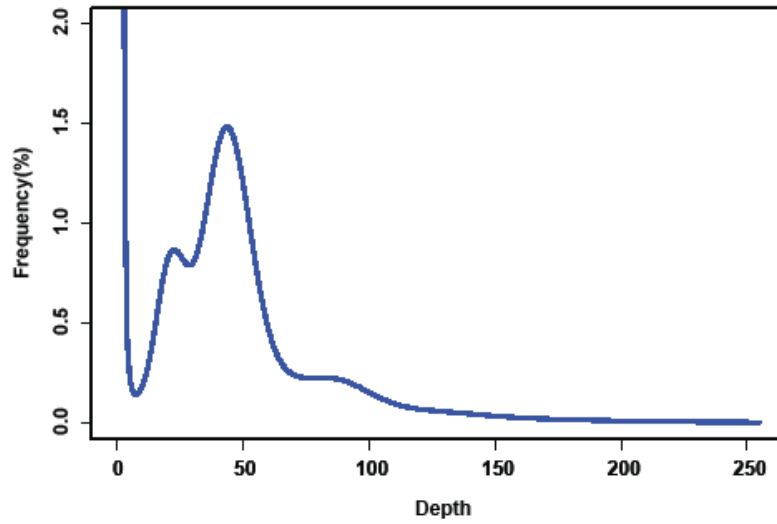

**Supplementary Figure S2 | 17-k-mer estimation of genome size.** Genome size of *M. brandtii* was estimated to be 1.9 Gb based on reads from short insert size libraries.

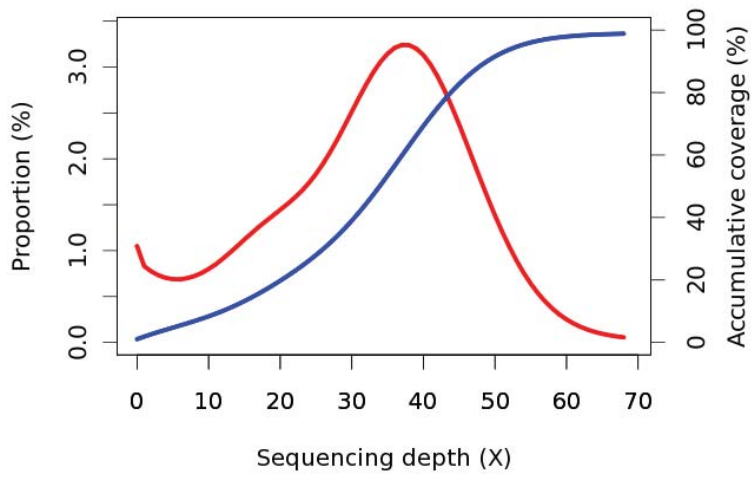

**Supplementary Figure S3 | Sequencing depth distribution of *M. brandtii* genome.** High quality short insert size reads were mapped to the associated genome with an average depth of 34, and approximately 91.64% of the genome was covered by more than 10 reads. The red curve denotes the proportion of the genome in a given sequencing depth, and the blue curve shows the cumulative coverage of the genome.

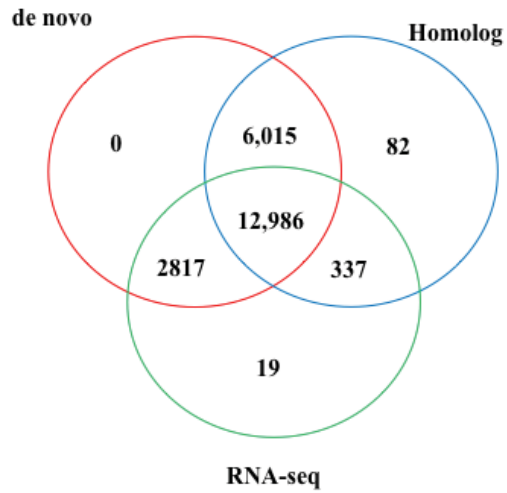

**Supplementary Figure S4 | Evidence for gene models from three types of gene prediction sources.** If a gene model predicted by different methods showed more than 50% overlap, multiple evidence support was called. Red, blue and green circles represent *de novo*-, homology-, and evidence-based (transcriptomic) gene predictions, respectively.

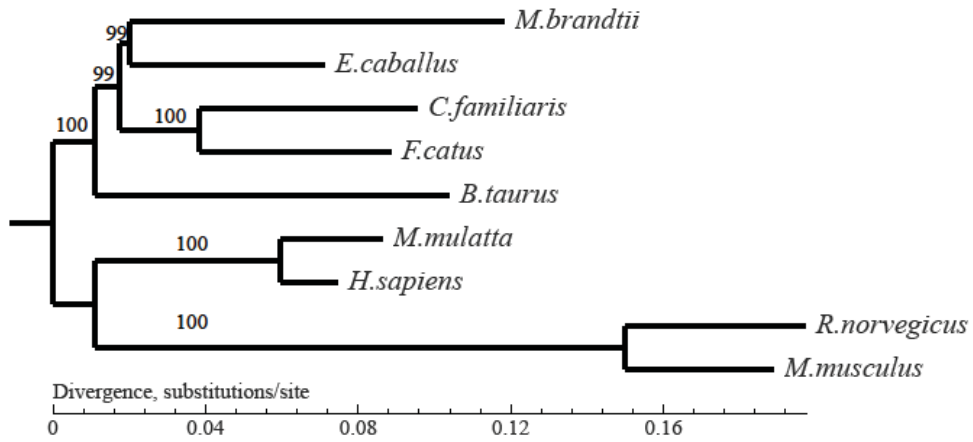

**Supplementary Figure S5 | Phylogenetic tree of 9 mammalian species.** Trees were constructed with PhyML under GTR +gamma model based on total CDS. The bootstrap values were calculated based on 1,000 replications.

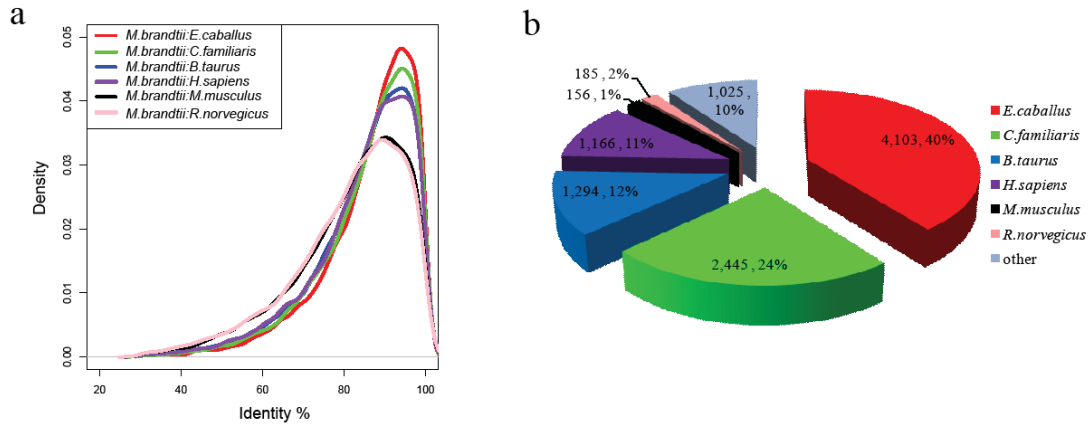

**Supplementary Figure S6 | *M. brandtii* proteins compared to orthologs in related mammals. (a)** Identity distribution of *M. brandtii* proteins to other species. Bat/Horse has the highest protein similarity. **(b)** Pie diagram shows the number and proportion of genes that share the highest protein identity between *M. brandtii* and related mammals, and horse has the highest gene number and proportion (1:1 ortholog were used for this analysis, “other” means more than one species share the highest identity with *M. brandtii*).

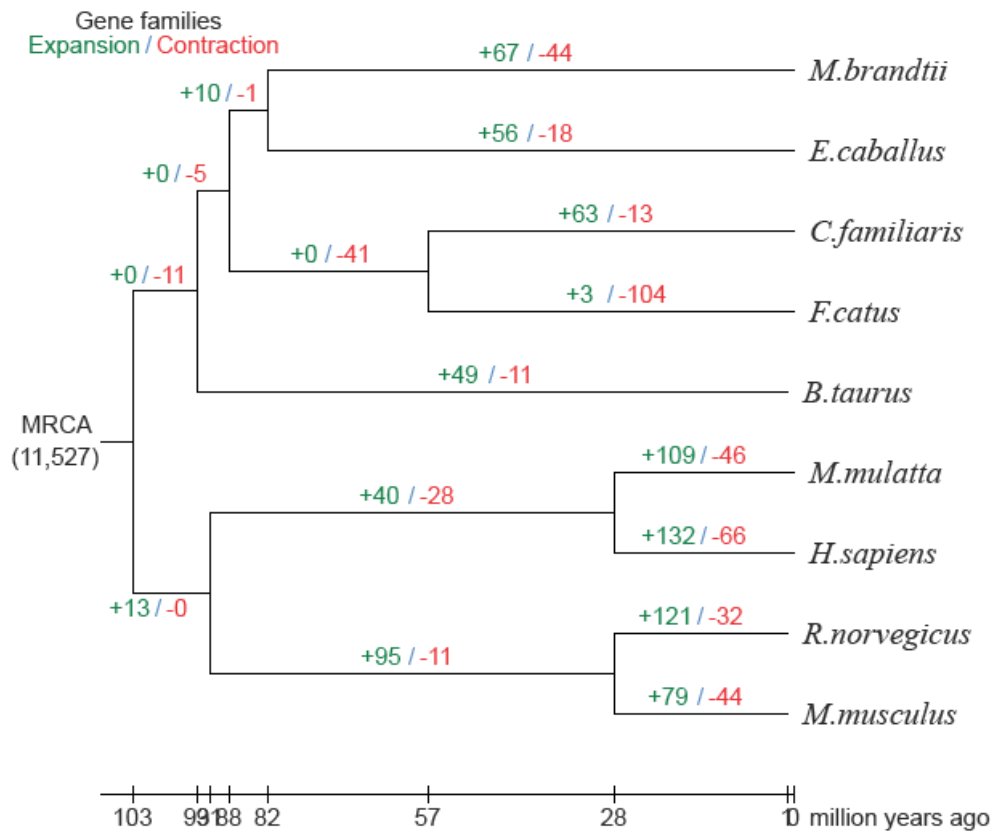

**Supplementary Figure S7 | Expanded and contracted gene families.** Gene family expansion events are shown in green, and gene family contraction events in red. MRCA refers to the gene family number of the most recent common ancestor.



|                     |            |       |     |            |               |               |      |     |   |   |   |   |   |   |   |   |   |   |
|---------------------|------------|-------|-----|------------|---------------|---------------|------|-----|---|---|---|---|---|---|---|---|---|---|
|                     | L          | L     | E   | A          | *             | A             | G    | L   | L | Q | V | D | P | E | K | K | Q | * |
| <i>M. lucifugus</i> | ...CTCCTCG | AAGCC | TAG | GCTGGTCTCT | TGCAGGTGGACCC | GGAGAAGAAGCAG | TGAC | ... |   |   |   |   |   |   |   |   |   |   |
| <i>M. brandtii</i>  | ...CTCCTCA | AAGCC | TAG | GCTGGCCTCT | TGCAGGTGGACCT | GGAGAAGAAGCAG | TGAC | ... |   |   |   |   |   |   |   |   |   |   |
|                     | L          | L     | K   | A          | *             | A             | G    | L   | L | Q | V | D | L | E | K | K | Q | * |

**Supplementary Figure S8 | *GULO* is a pseudogene in *M. brandtii*.** Nucleotide sequences of exon 4 of *GULO* in *M. lucifugus* (GenBank accession code JX259509) and *M. brandtii*. Identical nucleotide residues are shaded in black and premature stop codons in red. Corresponding amino acid residues are shown above and below their respective alignments.

**a**

|                     | TMD 7                 | TMD8                          |                         |
|---------------------|-----------------------|-------------------------------|-------------------------|
| human               | YLCISHLIGWTAFLSNMLFFT | DFMGQIVYRGDPYSAHNSTEFLIYERGV  | EVGCGWGLCINSVFSSLYS 385 |
| <i>M. lucifugus</i> | CLCISHLIGWTAFLSNMLFFT | DFMGRIVYHGNPYSAHNSTEFLIYERGV  | EVGCGWGLCINAVFSSLYS     |
| <i>M. brandtii</i>  | CLCISHLIGWTAFLSNMLFFT | DFMGRIVYHGNPYSAHNSTEFLIYERGV  | EVGCGWGLCINAVFSSLYS     |
| <i>E. fuscus</i>    | CLCISHLIGWTAFLSNMLFFT | DFMGRIVYHGNPYSAHNSTEFLIYERGV  | EVGCGWGLCINAMFSSLYS     |
| megabat             | YLCISHLIGWTAFLSNMLFFT | DFMGQIVYHGDPYSAHNSTEFLIYERGV  | EVGCGWGLCINSLFSSLYS     |
| dolphin             | CLCISHLIGWTAFLSNMLFFT | DFMGRIVYHGDPYSAHNSTEFLIYQRCV  | EVGCGWGLCINSVFSSLYS     |
| cow                 | CLCISHLIGWTAFLSNMLFFT | DFMGQIVYHGDPYGAHNSTEFLIYQRCV  | EVGCGWGLCINSMFSSLYS     |
| alpaca              | CLFISHLIGWTAFLSNMLFFT | DFMGQIVYHGDPYGAHNSTEFLIYQRCV  | EVGCGWGLCINAVFSSLYS     |
| NMR                 | CLCISHLIGWTAFLSNMLFFT | DFMGQIVYRGDPYSAHNSTEFLIYERGV  | EVGCGWGLCINSVFSSLYS     |
| elephant            | CLCISHLIGWTAFLSNMLFFT | DFMGQIVYRGNPYSAHNSTEFLIYQRCV  | EVGCGWGLCINSLFSSLYS     |
| rock hyrax          | CLCISHLIGWTAFLSNMLFFT | DYMGQIVYHGDPYSAHNSTEFLIYQRCV  | EVGCGWGLCINAVFSSLYS     |
| dog                 | CLCISHLIGWTAFLSNMLFFT | DFMGQIVYHGDPYSAHNSTEFLIYERGV  | EVGCGWGLCINSVFSSLYS     |
| cat                 | CLCISHLIGWTAFLSNMLFFT | DFMGQIVYHGDPYAAHNSTEFLIYERGV  | EVGCGWGLCINSMFSSLYS     |
| tenrec              | YLCISHLIGWTAFLSNMLFFT | DFMGQIVYRGNPYGAHNSTEFLIYERGV  | EVGCGWGLCINAVFSSLYS     |
| horse               | YLCISHLIGWTAFLSNMLFFT | DFMGQIVYHGDPYSAHNSTEFLIYQRCV  | EVGCGWGLCINSVFSSLYS     |
| shrew               | YLCISHLIGWTAFLSNMLFFT | DFMGQIVYHGDPYSAHNSTEFFIYQRCV  | EVGCGWGLCINSVSSLYS      |
| hedgehog            | YLCISHLIGWTAFLSNMLFFT | DYMGQIVYHGDPYSAHNSTEFLIYQRCV  | EVGCGWGLCINSMFSSLYS     |
| pika                | YLCISHLIGWTAFLSNMLFFT | DFMGQIVFQGGDPYSPHNSTEFLIYERGV | EIGCGWGLCINSVSSLYS      |
| rabbit              | CLCISHLIGWTAFLSNMLFFT | DFMGQIVFQGGDPYSPHNSTEFLIYERGV | EVGCGWGLCINSVSSLYS      |
| squirrel            | FLCISHLIGWTAFLSNMLFFT | DFMGQIVYGGDPYSTHNSTEFLIYQRCV  | EVGCGWGLCINSVFSSLYS     |
| baboon              | YLCISHLIGWTAFLSNMLFFT | DFMGQIVYGGDPYSAHNSTEFLIYERGV  | EVGCGWGLCINSVFSSLYS     |
| rhesus              | YLCISHLIGWTAFLSNMLFFT | DFMGQIVYGGDPYSAHNSTEFLIYERGV  | EVGCGWGLCINSVFSSLYS     |
| marmoset            | YLCISHLIGWTAFLSNMLFFT | DFMGQIVYHGDPYSAHNSTEFLIYERGV  | EVGCGWGLCINSIFSSLYS     |
| chimp               | YLCISHLIGWTAFLSNMLFFT | DFMGQIVYRGDPYSAHNSTEFLIYERGV  | EVGCGWGLCINSVFSSLYS     |
| orangutan           | YLCISHLIGWTAFLSNMLFFT | DFMGQIVYRGDPYSAHNSTEFLIYERGV  | EVGCGWGLCINSVFSSLYS     |
| gorilla             | YLCISHLIGWTAFLSNMLFFT | DFMGQIVYRGDPYSAHNSTEFLIYERGV  | EVGCGWGLCINSVFSSLYS     |
| mouse lemur         | CLCISHLIGWTAFLSNMLFFT | DFMGQIVYHGDPYSAHNSTEFLIYERGV  | EVGCGWGLCINSVFSSLYS     |
| tarsier             | YLCISHLIGWTAFLSNMLFFT | DFMGQIVYHGDPYSAHNSTEFLIYERGV  | EVGCGWGLCINSVFSSVYS     |
| bushbaby            | CLCISHLIGWTAFLSNMLFFT | DFMGQIVYHGDPYSAHNSTEFLIYERGV  | EVGCGWGLCINSVFSSFYs     |
| tree shrew          | CLCISHLIGWTAFLSNMLFFT | DFMGQIVYHGNPYSLHNSTEFLIYERGV  | EVGCGWGLCINSIFSSFYs     |
| kangaroo rat        | YLCVSHLIGWTAFLSNMLFFT | DFMGQIVYHGDPYSMHNSTEFLIYERGV  | EVGCGWGLCINSVFSSLYS     |
| guinea pig          | CLCISHLIGWTAFLSNMLFFT | DFMGQIVYHGDPYSPHNSTEFLIYERGV  | EIGCGWGLCINSVFSSVYS     |
| mouse               | CLCVSHLIGWTAFLSNMLFFT | DFMGQIVYHGDPYGAHNSTEFLIYERGV  | EVGCGWGLCINSVFSSVYS     |
| rat                 | CLCISHLIGWTAFLSNMLFFT | DFMGQIVYHGDPYGAHNSTEFLIYERGV  | EVGCGWGLCINSVFSSVYS     |
| wallaby             | YLCVSHLIGWTAFLSNMLFFT | DFMGQIVYHGDPYAPHNSTSFLIYERGV  | EVGCGWGLCINSVFSSLYS     |
| opossum             | YLCVSHLIGWTAFLSNMLFFT | DFMGQIVYHGDPYAPHNSTSFLIYERGV  | EVGCGWGLCINSVFSSLYS     |
| chicken             | CLCVSHLIGWTAFLSNMLFFT | DFMGQVVYQGSPPYASHNSTLYHTYRRG  | EVGCGWGLCINAIASSAYS     |
| zebra finch         | CLCVSHLIGWTAFLSNMLFFT | DFMGQVVYHGNPYAPHNSTLYLTYKAG   | VEMGCGWGLCINAISSVYS     |
| lizard              | CLCVSHLIGWTAFLSNMLFFT | DFMGQIVFNGDPYAPHNSTAYLTYERGV  | EIGCGWGLCINAISSSLYS     |
| frog                | YLCVSHLIGWTAFLSNMLFFT | DFMGQIVYHGNPYAEHNSTAYLTYERGV  | EVGCGWGLCINAISSALYS     |
| platypus            | CLCVSHLIGWTAFLSNMLFFT | DFMGQIVYHGDPYAAHNSTAYLYQRCV   | EIVGCGWGLCINSLFSSLYS    |
| tetraodon           | HLCVSHLIGWTAFLSNMLFFT | DFMGQIYKGNPYAEHNSTAYAVYERGV   | EVGCGWGLCINAVSSALYS     |
| fugu                | YLCVSHLIGWTAFLSNMLFFT | DFMGQIVYKGNPYSEHNSTAYAVYERGV  | EVGCGWGLCINAVSSALYS     |
| stickleback         | YLCVSHLIGWTAFLSNMLFFT | DFMGQIVYKGNPYADHNSTAYATYERGV  | EVGCGWGLCINAVSSALYS     |
| zebrafish           | CLCMTLLIGWTAFLSNMLFFT | DFMGQIVYKGNPYAEHNSTAYATYERGV  | EVGCGWGLCINAVSSALYS     |
| lamprey             | -LCISHLIGWMAFLSNMLFFT | DYMGQIVYKGNPYAKHTSSEYRLYEDG   | VEIGCGWGLCINAVSSALYS    |

\*\*\*:\*\*\*:\*\*\* \*\*\*. \*\*\*\*\*:\*\*\*:::\*. \*\*\*. \*. \* : : \*. \*\*\*:\*\*\*\*:\*\*\*\*: \* : \*

**b**

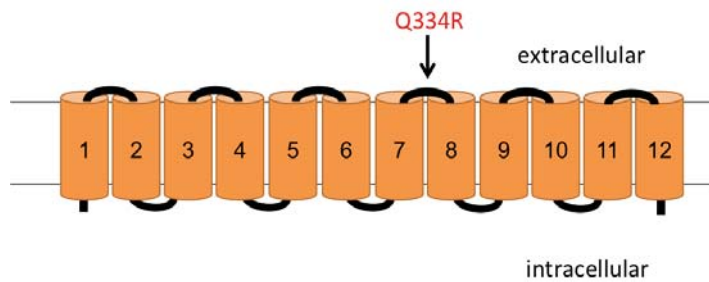

**Supplementary Figure S9 | Shared unique residue in SLC45A2 of echolocating bats and dolphin.** (a) Alignment of vertebrate SLC45A2 protein sequences. Transmembrane domains are highlighted in orange and extracellular regions in black. Unique amino acids in echolocating bats and the Atlantic bottlenose dolphin are highlighted in red. (b) Model of SLC45A2 subunit showing the approximate position of the novel amino acid (in red). Transmembrane sequences are shown in orange.

|                     |                    |                  |             |     |
|---------------------|--------------------|------------------|-------------|-----|
| human               | SGPEDGEIHPEICRLYIQ | QCCEMYTTEMLKSI   | CLLGSLOFHRK | 154 |
| <i>M. lucifugus</i> | SGPEGGEIHPEICRLYIQ | QCCEMYTTEMLKSI   | CLLGSLOFHRK |     |
| <i>M. brandtii</i>  | SGPEGGEIHPEICRLYIQ | QCCEMYTTEMLKSI   | CLLGSLOFHRK |     |
| <i>E. fuscus</i>    | SGPEGGEIHPEICRLYIQ | QCCEMYTTEMLKSV   | CLLGSLOFHRK |     |
| megabat             | SGPEDGEIHPEICRLYIQ | QCCEMYTTEMLKSI   | CLLGSLOFHRK |     |
| dolphin             | SGPEGGEIHPEICRLYIQ | QCCEMYTTEMLKSI   | CLLGSLOFHRK |     |
| cow                 | SGPEDGEIHPEICRLYIQ | QCCEMYTTEMLKSI   | CLLGSLOFHRK |     |
| guinea pig          | SGPEDGEIHPEICRLYIQ | QCCEMYTTEMLKSI   | CLLGSLOFHRK |     |
| naked mole rat      | SGPEDGEIHPEICRLYIQ | QCCEMYTTEMLKSI   | CLLGSLOLHRK |     |
| mouse               | SGPEDGEIHPEICRLYIQ | QCCEMYTTEMLKSI   | CLLGSLOFHRK |     |
| rat                 | SGPEDGEIHPEICRLYIQ | QCCEMYTTEMLKSI   | CLLGSLOFHRK |     |
| sloth               | SGPEDGEIHPEICRLYIQ | QCCEMYTTEMLKSI   | CLLGSLOFHRK |     |
| squirrel            | SGPEDGEIHPEICRLYIQ | QCCEMYTTEMLKSI   | CLLGSLOFHRK |     |
| mouse lemur         | SGPEDGEIHPEICRLYIQ | QCCEMYTTEMLKSI   | CLLGSLOFHRK |     |
| chimp               | SGPEDGEIHPEICRLYIQ | QCCEMYTTEMLKSI   | CLLGSLOFHRK |     |
| rhesus              | SGPEDGEIHPEICRLYIQ | QCCEMYTTEMLKSI   | CLLGSLOFHRK |     |
| cat                 | --PEDGEIHPEICRLYIQ | QCCEMYTTEMLKSI   | CLLGSLOFHRK |     |
| gorilla             | --PEDGEIHPEICRLYIQ | QCCEMYTTEMLKSI   | CLLGSLOFHRK |     |
| dog                 | SGPEDGEIHPEICRLYIQ | QCCEMYTTEMLKSI   | CLLGSLOFHRK |     |
| rabbit              | SGPEDGEIHPEICRLYIQ | QCCEMYTTEMLKSI   | CLLGSLOFHRK |     |
| marmoset            | SGPEDGEIHPEICRLYIQ | QCCEMYTTEMLKSI   | CLLGSLOFHRK |     |
| baboon              | SGPEDGEIHPEICRLYIQ | QCCEMYTTEMLKSI   | CLLGSLOFHRK |     |
| orangutan           | SGPEDGEIHPEICRLYIQ | QCCEMYTTEMLKSI   | CLLGSLOFHRK |     |
| horse               | SGPEDGEIHPEICRLYIQ | QCCEMYATEMLKSI   | CLLGSLOFHRK |     |
| tenrec              | SGPEDGEIHPEICRLYIQ | QCCEMYTTEMLKSI   | CLLGSLOLHRK |     |
| elephant            | SGPEDGEIHPEICRLYIQ | QCCEMYTTEMLKSI   | CLLGSLOFHRK |     |
| rock hyrax          | SGPEDGEIHPEICRLYIQ | QCCEMYTTEMLKSI   | CLLGSLOFHRK |     |
| tree shrew          | SGPEDGEIHPEICRLYIQ | QCCEMYTTEMLKSI   | CLLGSLOFHRK |     |
| kangaroo rat        | SGPEDGEIHPEICRLYIQ | QCCEMYTTEMLKSI   | CLLGSLOFHRK |     |
| tarsier             | SGPEDGEIHPEICRLYIQ | QCCEMYTTEMLKSI   | CLLGSLOFHRK |     |
| pika                | --PEDGEIHPEICRLYIQ | QCCEMYTTEMLKSI   | CLLGSLOFHRK |     |
| bushbaby            | SGPEDGEIHPEICRLYIQ | QCCEMYTTEMLKSI   | CLLGSLOFHRK |     |
| kangaroo rat        | SGPEDGEIHPEICRLYIQ | QCCEMYTTEMLKSI   | CLLGSLOFHRK |     |
| alpaca              | SGPEDGEIHPEICRLYIQ | QCCEMYTTEMLKSI   | CLLGSLOFHRK |     |
| hedgehog            | SGPEDGEIHPEICRLYIQ | QCCEMYTTEMLKSI   | CLLGSLOFHRK |     |
| opossum             | SGPEDGEIHPEICRLYIQ | QCCEMYTTEMLKSI   | CLLGSLOFHRK |     |
| chicken             | SGPEDGEIHPEICRLYIQ | QCCEMYTTEMLKSI   | CLLGSLOFHRK |     |
| zebra finch         | SGPEDGEIHPEICRLYIQ | QCCEMYTTEMLKSI   | CLLGSLOFHRK |     |
| wallaby             | SGPEDGEIHPEICRLYIQ | QCCEMYTTEMLKSI   | CLLGSLOFHRK |     |
| platypus            | SGPEDGEIHPEICRLYIQ | QCCEMYTTEMLKSI   | CLLGSLOFHRK |     |
| lizard              | SGPEDGEIHPEICRLF   | IQCCCEMYTTEMLKSI | CLLGSLOLHRK |     |
| frog                | SGPEDGEIHPEICRLYIQ | QCCEMYTTEMLKSM   | CLLGSLOHQRK |     |
| tetraodon           | SGPEDGEIHPEICRLF   | IQCCCEMYITEMLKSV | CLLGSLOLHRK |     |
| medaka              | SGPEDGEIHPEICRLF   | IQCCCEMYITEMLKSV | CMLGSLQLHMK |     |
| fugu                | SGPEDGEIHPEICRLF   | IQCCCEMYITEMLKSV | CLLGSLOLHRK |     |
| stickleback         | SGPEDGEIHPEICRLF   | IQCCCEMYITEMLKSV | CLLGSLOLHRK |     |
| zebrafish           | SGPEDGEIHPEICRLF   | IQCCCEMYLTEMLKSV | CLLGSLOLHRK |     |
| lamprey             | --PEEGEIQYDIYRLYIQ | FHGCCEMYISEMLKSI | CLMSEFQLQGK |     |

**Supplementary Figure S10 | Shared unique residue in RGS7BP of echolocating bats and dolphin.** Alignment of vertebrate RGS7BP-gene encoded sequences. Novel amino acid changes are shown in red, and conserved residues are highlighted in black.



|             |                                                               |        |          |                 |         |                      |     |
|-------------|---------------------------------------------------------------|--------|----------|-----------------|---------|----------------------|-----|
| M.brandtii  | VTVQHKKLRTPLNYILLNLAVANL                                      | FMV    | GGFT     | TLYTS           | HGYFVFG | TGCNLEGGFFATLG       | 120 |
| M.lucifugus | VTVQHKKLRTPLNYILLNLAVANL                                      | FMV    | GGFT     | TLYTS           | HGYFVFG | TGCNLEGGFFATLG       |     |
| M.davidii   | VTVQHKKLRTPLNYILLNLAVANL                                      | FMV    | GGFT     | TLYTS           | HGYFVFG | TGCNLEGGFFATLG       |     |
| megabat     | VTVQHKKLRTPLNYILLNLAVAD                                       | LFMV   | GGFT     | TLYTS           | HGYFVFG | TGCNLEGGFFATLG       |     |
| mouse       | VTVQHKKLRTPLNYILLNLAVAD                                       | LFMV   | GGFT     | TLYTS           | HGYFVFG | TGCNLEGGFFATLG       |     |
| human       | VTVQHKKLRTPLNYILLNLAVAD                                       | LFMV   | GGFTS    | TLYTS           | HGYFVFG | TGCNLEGGFFATLG       |     |
|             |                                                               | 83     |          | 99              |         | 107                  |     |
| M.brandtii  | GEIALWSLVVLAIERVYVVVCKPMSNFRFGENHAIMGLAFTWVMALACAAPPIAGWSRYIP |        |          |                 |         |                      | 180 |
| M.lucifugus | GEIALWSLVVLAIERVYVVVCKPMSNFRFGENHAIMGLAFTWVMALACAAPPIAGWSRYIP |        |          |                 |         |                      |     |
| M.davidii   | GEIALWSLVVLAIERVYVVVCKPMSNFRFGENHAIMGLAFTWVMALACAAPPIAGWSRYIP |        |          |                 |         |                      |     |
| megabat     | GEIALWSLVVLAIERVYVVVCKPMSNFRFGENHAIMGLAFTWVMALACAAPPIAGWSRYIP |        |          |                 |         |                      |     |
| mouse       | GEIALWSLVVLAIERVYVVVCKPMSNFRFGENHAIMGVVFTWIMALACAAPPIAGWSRYIP |        |          |                 |         |                      |     |
| human       | GEIALWSLVVLAIERVYVVVCKPMSNFRFGENHAIMGVVFTWIMALACAAPPIAGWSRYIP |        |          |                 |         |                      |     |
| M.brandtii  | EGMQCSCGIDYYTLKPEVNNE                                         | SFVI   | YMFVVHFT | IPMI            | VIF     | FCYGQLVFTVKEAAAQQQES | 240 |
| M.lucifugus | EGMQCSCGIDYYTLKPEVNNE                                         | SFVI   | YMFVVHFT | IPMI            | VIF     | FCYGQLVFTVKEAAAQQQES |     |
| M.davidii   | EGMQCSCGIDYYTLKPEVNNE                                         | SFVI   | YMFVVHFT | IPMI            | VIF     | FCYGQLVFTVKEAAAQQQES |     |
| megabat     | EGMQCSCGIDYYTLKPEVNNE                                         | SFVI   | YMFVVHFT | IPMI            | VIF     | FCYGQLVFTVKEAAAQQQES |     |
| mouse       | EGMQCSCGIDYYTLKPEVNNE                                         | SFVI   | YMFVVHFT | IPMI            | VIF     | FCYGQLVFTVKEAAAQQQES |     |
| human       | EGMQCSCGIDYYTLKPEVNNE                                         | SFVI   | YMFVVHFT | IPMI            | VIF     | FCYGQLVFTVKEAAAQQQES |     |
| M.brandtii  | ATTQKAEKEVTRMVIIMV                                            | AFLICW | PYAS     | VAFYIFTHQGSNFGP | FMT     | PAFFAKSSSI           | 300 |
| M.lucifugus | ATTQKAEKEVTRMVIIMV                                            | AFLICW | PYAS     | VAFYIFTHQGSNFGP | FMT     | PAFFAKSSSI           |     |
| M.davidii   | ATTQKAEKEVTRMVIIMV                                            | AFLICW | PYAS     | VAFYIFTHQGSNFGP | FMT     | PAFFAKSSSI           |     |
| megabat     | ATTQKAEKEVTRMVIIMV                                            | AFLICW | PYAG     | VAFYIFTHQGSNFGP | FMT     | PAFFAKSSSI           |     |
| mouse       | ATTQKAEKEVTRMVIIMV                                            | FFLICW | PYAS     | VAFYIFTHQGSNFGP | FMT     | PAFFAKSSSI           |     |
| human       | ATTQKAEKEVTRMVIIMV                                            | AFLICW | PYAS     | VAFYIFTHQGSNFGP | FMT     | PAFFAKSAAI           |     |
|             |                                                               | 259    |          |                 |         | 286#                 |     |

**Supplementary Figure S11 | Comparison of bat, mouse and human Rhodopsin/*RHO* sequences.** Residues corresponding to a previous study<sup>2</sup> that examined Rhodopsin in the bat genus *Myotis* are highlighted in green, while conflicting residues are shown in red. # indicates a residue previously thought to be uniquely changed in *Myotis* by analyzing *M. laniger*, *M. davidii* and *M. ricketti* sequences<sup>2</sup>.

*M. brandtii* MSGE<sup>46</sup>EEFYLFKNISSVGPWDGPOYH<sup>49</sup>LAPVWAF<sup>52</sup>LQAAF<sup>52</sup>MGEVFFACT<sup>52</sup>PLNATV<sup>52</sup>LVATLRY 60  
*M. davidii* -----FMGEVFFACT<sup>52</sup>PLNATV<sup>52</sup>LVATLRY  
 megabat MSGE<sup>46</sup>EEFYLFKNISLVGPWDGPOYH<sup>49</sup>LAPVWAF<sup>52</sup>LQAAF<sup>52</sup>MGEVFFVGT<sup>52</sup>PLNATV<sup>52</sup>LVATLRY  
 mouse MSGE<sup>46</sup>DDFYLFKNISSVGPWDGPOYH<sup>49</sup>LAPVWAF<sup>52</sup>LQAAF<sup>52</sup>MGEVFFVGT<sup>52</sup>PLNATV<sup>52</sup>LVATLRY  
 human MS-EEFYLFKNISSVGPWDGPOYH<sup>49</sup>LAPVWAF<sup>52</sup>LQAAF<sup>52</sup>MGT<sup>52</sup>VFLIC<sup>52</sup>PLNAMV<sup>52</sup>LVATLRY

*M. brandtii* KKLROPLNYILVNS<sup>86</sup>GGFL<sup>86</sup>ECIFSVE<sup>93</sup>TVFIASC<sup>93</sup>GYF<sup>93</sup>VFGRHVCALEA<sup>114</sup>FLG<sup>114</sup>STAGL 117  
*M. davidii* KKLROPLNYILVNS<sup>86</sup>GGFL<sup>86</sup>ECIFSVE<sup>93</sup>TVFIASC<sup>93</sup>GYF<sup>93</sup>VFGRHVCALEA<sup>114</sup>FLG<sup>114</sup>STAGL  
 megabat KKLROPLNYILVNS<sup>86</sup>GGFL<sup>86</sup>ECIFSVE<sup>93</sup>TVFIASC<sup>93</sup>GYF<sup>93</sup>VFGRHVCALEA<sup>114</sup>FLG<sup>114</sup>STAGL  
 mouse KKLROPLNYILVNS<sup>86</sup>GGFL<sup>86</sup>ECIFSVE<sup>93</sup>TVFIASC<sup>93</sup>GYF<sup>93</sup>VFGRHVCALEA<sup>114</sup>FLG<sup>114</sup>SVAGL  
 human KKLROPLNYILVNS<sup>86</sup>GGFL<sup>86</sup>LCIFSVE<sup>93</sup>VFFVASC<sup>93</sup>GYF<sup>93</sup>VFGRHVCALE<sup>114</sup>GFLG<sup>114</sup>TVAGL

**Supplementary Figure S12 | Comparison of bat, mouse and human S opsin/*OPN1SW* sequences.** Residues that alter the tuning of short-wavelength sensitive opsin/*OPN1SW* (S opsin) are numbered and the corresponding *Myotis* residues are highlighted in green.

**a**

|                     |                                                             |     |
|---------------------|-------------------------------------------------------------|-----|
| human               | GFNPMFRANRMLKYTSFFEFNHHLESIMDKAYTYRVIRTTGYLLFILHINACVYYWAS  | 348 |
| <i>M. brandtii</i>  | GFNPIFRINRILKYRSFFEFNHCLESIMNRAYTYRVARTAGLLFALHVNACIYYWAS   |     |
| <i>M. lucifugus</i> | GFNPIFRINRILKYRSFFEFNHRLESIMNRAYTYRVARTAGLLFALHVNACIYYWAS   |     |
| <i>E. fuscus</i>    | GFNPIFRTNRILKVRSSFFEFNHRLESIMDKAYTYRVARTAGLLFALHVNACIYYWAS  |     |
| megabat             | GFNPIFRTNKILKYTSFFEFNHRLESAMDKAYTYRVFRTTGYLLFTLHINACIYYWAS  |     |
| dog                 | GFNPVFRMNRILKYTSFFEFNHHLESIMDKAYTYRVIRTTGYLLYTLHINACIYYWAS  |     |
| cat                 | GFNPIFRANRILKYTSFFEFNHHLESIMDKAYTY-----                     |     |
| kangaroo rat        | GFNPIFRTNRILKYTSFLEFNHHLESIMNKAYTYRIIRTTGYLLFILHINACIYYCAS  |     |
| squirrel            | -----YTSFFEFNHHLESIMEKAYTY-----                             |     |
| guinea pig          | GYNTMFRANRMLKYTSFFEFNHHLESIMNKAYTYRVIRTTGYLLFILHVNACVYYWAS  |     |
| tree shrew          | GFNPIFRANKILKYTSFFDFNHHLESIMDKAYTY-----                     |     |
| gorilla             | GFNPIFRANRMLKYTSFFEFNHHLESI-----VIRTTGYLLFILHINACVYYWAS     |     |
| chimp               | GFNPIFRANRMLKYTSFFEFNHHLESIMDKAYTYRVIRTTGYLLFILHINACVYYWAS  |     |
| orangutan           | GFNPIFRANRMLKYTSFFEFNHHLESIMDKAYTYRVIRTTGYLLFILHINACVYYWAS  |     |
| baboon              | GFNPIFRANRMLKYTSFFEFNHHLESIMDKAYTYRVIRTTGYLLFILHINACVYYWAS  |     |
| rhesus              | GFNPIFRANRMLKYTSFFEFNHHLESIMDKAYTYRVIRTTGYLLFILHINACVYYWAS  |     |
| marmoset            | GFNPIFRANRMLKYTSFFEFNHHLESIMDKAYTYRVIRTTGYLLFILHINACVYYWAS  |     |
| tarsier             | GFNPIFRINRMLKYTSFFEFNHHLESIMDKAYTYRVIRTTGYLLFILHINACIYFWAS  |     |
| cow                 | GLNPIFRTNRMLKYSSFFEFNHHLESIMNKAYTYRVIRTTGYLLFTLHINACMYWAS   |     |
| alpaca              | GFNPIFRINRMLKYTSFFEFNHHLESIMNKAYTYRVIRTTGYLLFTLHINACLYYWAS  |     |
| dolphin             | GFNPIFRINRMLKYTSFFEFNHHLESIMNKAYTYRGIRTTGYLLFTLHINACMYWAS   |     |
| mouse lemur         | -----YTSFFEFNHHLESIMDKAYTYRVIRTTGYLLFILHINACIYYWAS          |     |
| bushbaby            | GFNPIFRTNRILKYTSFFEFNHHLEAVMDRAYTYRVFRTTGYLLFTLHINACIYYWAS  |     |
| horse               | GFNPIFRTNRVLKYTSFFEFNHHLESIMDKAYTYRVIRTTGYLLFTLHINACIYYWAS  |     |
| sloth               | GFNPIFRTNRILKYASFFEFNHHLESILDKAYTYRVFRTTGYLLFTLHINACIYYWAS  |     |
| armadillo           | GFNPIFRTNRILKFASFFEFNHHLESILDKAYTYRVFQTSGYLLFTLHINTCIYYRAS  |     |
| hedgehog            | GFNPIFRTNRILKYNSFFEFNHHLESIMKKAYTYRVIRTTGYLLFTLHINACIYYWAS  |     |
| tenrec              | GFNPIFRANRMLKYTSFFAFNHHLESIMMGKAYTYRVIRTTGYLLFTLHINACVYYWAS |     |
| rock hyrax          | GFNPIFRANRMLKYTSFFEFNHHLESTMDKAYTYRVIRTTGYLLFTLHLNTCIYYWAS  |     |
| elephant            | GFNPIFRANRILKYTSFFEFNHHLESIMDKAYTYRVIRTTGYLLFTLHINTCIYYWAS  |     |
| pika                | GFNPIFRTNRMLKYTSFFEFNHHLESIMDKAYTYRVIRTTGYLLFTLHINACIYYWAS  |     |
| rabbit              | GFNPIFRTNRILKYTSFFEFNHHLESVMDKAYTYRVIRTTGYLLFTLHINACIYYWAS  |     |
| pika                | GFNPIFRTNRMLKYTSFFEFNHHLESIMEKAYTYRVIRTTGYLLFTLHINACIYYWAS  |     |
| chicken             | GFNPAFRVNRMLKHNTFFEFNDRLEAILEDKAYTYRVIRTTGYLLFILHINACLYYWAS |     |
| zebrafinch          | GFNPALFRANRMLKHNTFFEFNDRLEAIMEKAYTYRVIRTTGYLLFILHINACLYYWAS |     |
| lizard              | GFHAIFRANRVEFKHLTFFEFNDRLEGIMDKAYTYRVIRTTGYLLFTLHLNACVYYCAS |     |
| frog                | GFQPVFRANRLLKYTSFFEFNDRLEAVMEKAYTYRVIRTTGYLLFILHINACIYYWAS  |     |
| platypus            | GFNPMFRANRLLKYNTFFEFNDRLEAIMDKAYTYRVIRTTGYLLFTLHINACIYYWAS  |     |
| wallaby             | GFNPVFRTNRTLKCIITFFEFNDRLESIMDKAYTY-----                    |     |
| opossum             | GFNPVFRTNRTLKYITFFEFNDRLESIMDKAYTYRVIRTTGYLLFVHLVNACIYSLAS  |     |
| mouse               | GVNPIFRANRILKYTSFFEFNHHLESIMDKAYTYRVIRTTGYLLFTLHINACVYYWAS  |     |
| rat                 | GVNPIFRTNRILKYTSFFEFNHHLESIMDRAYTYRIIRTTGYLLFTLHINACVYYWAS  |     |
| zebrafish           | GFNSVFRNLNRLMKCIYFC-FN-LINV-----VGRRTGYLLYCLHINSCLYYVAS     |     |
| tetraodon           | -----YQVFFEFNDRMEAVMKKAYTYRVIRTTSTYLLYSLHINACLFYWGS         |     |
| fugu                | -----YQIFSEFNDRMEAVMKKAYTYRVIRTTSTYLLYSLHINACLFYWGS         |     |
| stickleback         | -----YMAFFEFNDRMEAVMKKAYTYRVIRTTSTYLLYSLHINACLFYWGS         |     |
| medaka              | -----YMVFFEFNDRMEAVMKKAYTYRVIRTTSTYLLYSLHINACLFYWGS         |     |

**b**

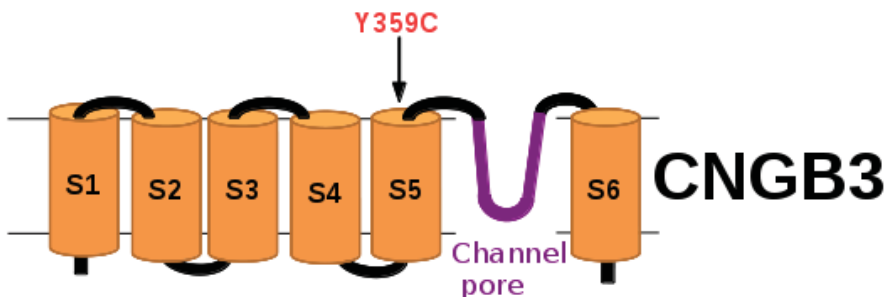

**Supplementary Figure S13 | Unique amino acid change in CNGB3 of echolocating bats. (a)** Alignment of vertebrate CNGB3 protein sequences. Transmembrane regions are highlighted in orange and unique amino acids in echolocating bats in red. **(b)** Model of CNG subunit showing the approximate position of the novel CNGB3 amino acids (in red). The channel pore is shown in purple and transmembrane domains 1 to 6 (S1-S6) in orange.



|                    |                                                |        |          |          |     |
|--------------------|------------------------------------------------|--------|----------|----------|-----|
| <i>M.brandtii</i>  | TRRNTQKACTEKELVYETVRVPGCAHHADSLYTPVATECHCGKCN  | RDST   | DCTVQGLG | GPS      | 102 |
| <i>M.lucifugus</i> | TRRNTQKACTEKELVYETVRVPGCAHHADSVYTPVATECHCGKCN  | RDST   | DCTVQGLG | GPS      |     |
| <i>E.fuscus</i>    | TRRNTQKVCTEKELLYETVRVPGCAHQADSVYTPVATECHCGKCN  | RDST   | DCTVQGLG | GPS      |     |
| elephant           | ARPNTQKTCTEKELVYETVRVPGCAHHADSLYTPVATECHCGKCN  | SDST   | DCTVRLGL | GPS      |     |
| squirrel           | ARTNIQKICTEKELVYETVRVPGCAHHADSLYTPVATECHCGKCN  | SDST   | DCTVQGLG | GPS      |     |
| tarsier            | ARPNTQKICTEKELVYETVRVPGCAHHADSLYTYLVATECHCGKCN | SDST   | DCTVQGLG | GPS      |     |
| cat                | ARPNTQKTCTEKELVYETVRVPGCAHQADSLYTPVATECHCGKCN  | SDST   | DCTVQGLG | GPS      |     |
| dog                | ARPSIQKTCTERELAYETVRVPGCAHHADSLHTYTPVATECHCGRC | SDST   | DCTVRLGL | GG       |     |
| shrew              | ARPNIQKTCTEKELVYETVRVPGCAHHADSLYTPVATECHCGRC   | SDST   | DCTVRLGL | GN       |     |
| tenrec             | ARPNSQKACTEKEVVYETVRVPGCAHHADSLYTPVATQCHCGKCN  | SDST   | DCTVRLGL | GPS      |     |
| tree shrew         | ARPTIQKACTEKELVYETVRVPGCAHHADSLYTPVATECHCGKCN  | SDST   | DCTVRLGL | GPS      |     |
| guinea pig         | ARPNIQKTCTEKELVYETVRVPGCAHHADSLYTPVATECHCGKCN  | SDST   | DCTVRLGL | GPS      |     |
| pika               | ARLNIQKTCTEKELVYETVRVPGCAKQADSLYTPVATECHCGKCN  | SDST   | DCTVRLGL | GPS      |     |
| sloth              | ARPNIQKVCTEKQLVYETVRVPGCAHRTDSLTYTPVATECHCGKCN | SDST   | DCTVRLGL | GPS      |     |
| armadillo          | ARPNIQKTCTEKELVYETVRVPGCAHHTDSLTYTPVATECHCGKCN | SDST   | DCTVRLGL | GPS      |     |
| kangaroo rat       | ARPNIQKTCTEKELVYETVRVPGCAHHTDSLTYTPVATECHCGKCN | SDST   | DCTVRLGL | GN       |     |
| rock hyrax         | ARPNTQKTCTEKELVYETVRVPGCAHHTDSLTYTPVATECHCGKCN | SDST   | DCTVRLGL | GPS      |     |
| cow                | ARPNIQKTCTEKELVYETVRVPGCAHHADSLYTPVATECHCGKCN  | SDST   | DCTVRLGL | GPS      |     |
| dolphin            | ARPNIQKTCTEKELMYETVRVPGCAHHADSLYTPVASECHCGKCN  | SDST   | DCTVRLGL | GPS      |     |
| alpaca             | ARPNIQKTCTEKELVYETVRVPGCAHHADSLYTPVATECHCGKCN  | SDST   | DCTVRLGL | GPS      |     |
| horse              | ARPNIQKTCTEKELVYETVRVPGCAHHADSLYTPVATACHCGKCN  | SDST   | DCTVRLGL | GPS      |     |
| hedgehog           | ARPNIQKACTEKDVVYETVRVPGCAHHADSLYTPVATECHCGKCN  | SDST   | DCTVRLGL | GPS      |     |
| megabat            | ARPNIQKTCTEKELVYETVRVPGCAHHADSLYTPVATECHCGKCN  | SDNT   | DCTVRLGL | GPS      |     |
| baboon             | ARPNIQKTCTEKELVYETVRVPGCAHHADSLYTPVATQCHCGKCN  | SDST   | DCTVRLGL | GPS      |     |
| rhesus             | ARPNIQKTCTEKELVYETVRVPGCAHHADSLYTPVATQCHCGKCN  | SDST   | DCTVRLGL | GPS      |     |
| marmoset           | ATPNIQTTCTEKELVYETVRVPGCAHHADSLYTPVATQCHCGKCN  | SDST   | DCTMQLGL | GD       |     |
| gorilla            | ARPNIQKTCTEKELVYETVRVPGCAHHADSLYTPVATQCHCGKCN  | SDST   | DCTVRLGL | GPS      |     |
| human              | ARPKIQKTCTEKELVYETVRVPGCAHHADSLYTPVATQCHCGKCN  | SDST   | DCTVRLGL | GPS      |     |
| chimp              | ARPNIQKTCTEKELVYETVRVPGCAHHADSLYTPVATQCHCGKCN  | SDST   | DCTVRLGL | GPS      |     |
| orangutan          | ARPNIQKTCTEKELVYETVRVPGCAHHADSLYTPVATQCHCGKCN  | SDST   | DCTVRLGL | GPS      |     |
| mouse lemur        | ARPNIQKACTEKELVYETVRVPGCAHHADSLYTPVATECHCGKCN  | SDST   | DCTVRLGL | GPS      |     |
| bushbaby           | ARPNIQKACTEKELVYETVRVPGCAHHADSLYTPVATECHCGKCN  | SDST   | DCTVRLGL | GN       |     |
| rabbit             | ARPNIQKICTEKELVYETVRVPGCAHHADSLYTPVATECHCGKCN  | SDST   | DCTVRLGL | GPS      |     |
| mouse              | ARPNTQKVCTEKELVYETVRVPGCAHRSDSLTYTPVATECHCGKCN | SDST   | DCTVRLGL | GPS      |     |
| rat                | ARPNTQKVCTEKELVYETVRVPGCAHRSDSLTYTPVATECHCGKCN | SDST   | DCTVRLGL | GPS      |     |
| wallaby            | IRPNIQKACTEKEVVYETVRVPGCAHRSDSLTYTPVATECHCGKCN | SDNT   | DCTVRLGL | GPT      |     |
| opossum            | IRPNIQKACTEREFVYETVRVPGCANQADSLYTPVATACHCGKCN  | SDST   | DCTVRLGL | GPS      |     |
| platypus           | VILSGSICTEKEFVYETVRVPGCANQADSLYTPVATDCYCGKCN   | DKTTDC | -----    |          |     |
| chicken            | PVSSVQICTEKEVVYETVRVPGCGDHPESFYSPVATECHCETCD   | TDST   | DCTVRLGL | GPS      |     |
| zebra finch        | PVSTAQCTEKEVVYETVRVPGCGDHPESFYSPVATECHCETCD    | TDST   | DCTVRLGL | GPS      |     |
| lizard             | FIKNVQKVCTEKALVYETVRVPGCAGHTESLYTPVATECHCETCD  | NTDIT  | DCTSRGLE | GPS      |     |
| frog               | LIRKVVHVCVTMDIYETVRVPGCAENIDPYYSYPVALDC        | CDLCLN | LHHT     | DCTVRLGL | GPS |

**Supplementary Figure S14 | Alignment of vertebrate FSH $\beta$  sequences.** Alignment of vertebrate FSHB-gene encoded sequences. FSH $\beta$  residues buried at the FSHR receptor-ligand interface are highlighted in purple, while radical amino acid substitutions within the interface in bats with delayed ovulation are shown in red. Amino acid numbering corresponds to the mature FSH $\beta$  peptide.

|                       |                           |     |
|-----------------------|---------------------------|-----|
| <i>M.brandtii</i>     | FPWFLIIIFGMFGLTVI-FLFVFS  | 287 |
| <i>M.lucifugus</i>    | FPWFLIIIFGMFGLTVI-FLFMFS  |     |
| <i>E.fuscus</i>       | FPWFLIIIFGMFGLTVI-FLFMFS  |     |
| <i>T.brasiliensis</i> | FPWFLIIIFGMFGLTVI-FLFMFS  |     |
| <i>A.jamaicensis</i>  | FPWFFLIFFGLFGLTVILLFFIFS  |     |
| megabat               | FPWFLIIIFGIFGLTVILFLFIFS  |     |
| cat                   | FPWFLITIFGIFGLTMILFLFIFS  |     |
| dog                   | FPWFLIIIFGIFGLTMILFLFIFS  |     |
| alpaca                | FPWFLIIIFGIFGLTMILFLFIFS  |     |
| horse                 | FPWFLIIILGIFGLTVILFLFIFS  |     |
| rabbit                | FPWFLIIIFGIFGLTVMLFVFIFS  |     |
| tarsier               | FPWFLIIIFVIFGLTVMLFVFIFS  |     |
| three shrew           | FPWFLIVIFGIFGLTVMLFVFIFS  |     |
| human                 | FPWLLIIIFGIFGLTVMLFVFLFS  |     |
| chimp                 | FPWLLIIIFGIFGLTVMLFVFLFS  |     |
| organgutan            | FPWLLIIIFGIFGLTVMLFVFLFS  |     |
| rhesus                | FPWLLIIIFGIFGLTVMLFVFLFS  |     |
| baboon                | FPWLLIIIFGIFGLTVMLFVFLFS  |     |
| marmoset              | FPWLLIIIFGISGLTVMLFVFLFS  |     |
| rock hyrax            | FPWLLIIILGLCGLTVMVVFVIFS  |     |
| elephant              | FPWLLIIIFGIFGLTVMLFVFIFS  |     |
| armadillo             | FPWFLIIIFGISGLTVMLFVLIFS  |     |
| mouse                 | FPWFLIIIFGIFGVAVMLFVVIFS  |     |
| rat                   | FPWFLIIIFGIFGVAVMLFVVIFS  |     |
| guinea pig            | FPWFLIMIFGIFGLTVMLLVVMFS  |     |
| kangaroo rat          | FPWFLTNIIFGIFGLTALFVVFIFS |     |
| sloth                 | FPWFLIIIFGIFGLTAMLFVLIFS  |     |
| pika                  | FPWFLIIIFGIFGLTAMLFVFIFS  |     |
| bushbaby              | FPWFLIIIFGIFGLMAMLFVFGFS  |     |
| wallaby               | FPWFLIIIFGIFGLTVVLFVFILS  |     |
| opossum               | FPWFLIIIFGILGLTVVLFVFILS  |     |
| hedgehog              | FPWFLVVIIFGISGLTVILFVFMFS |     |
| platypus              | FPWFLVIIILGIFGLTVVFFILVFT |     |
| cow                   | FPWFLIIIFGILGLAVTLFLLIFS  |     |
| dolphin               | FPWFLFIIIFGTFLMVTFLCIFS   |     |
| lizard                | VPWPLVMAFGTLGLMVMLSIVLFS  |     |
| chicken               | FPWFLVVVFGVCGLAVTAILLLS   |     |
| zebra finch           | FPWFLVLVFGVCGLAVTVISVMLS  |     |

**Supplementary Figure S15 | Unique amino acid deletion in Vespertilionoidea bat GHR.** Alignment of vertebrate *GHR*-encoded sequences. An amino acid residue deleted in the superfamily Vespertilionoidea is shown in red.



|                    |                                             |                              |     |
|--------------------|---------------------------------------------|------------------------------|-----|
| human              | TGYENFIHLIIALPVAVLLIVGGLVIMLYVFH            | HRKRNNNSRLGNGVLYASVNPEYFSAAD | 985 |
| <i>M.brandtii</i>  | AAYDSIAHLVIALPIAIVLTVLGLALILYVIH            | RRKRNSNRGNGVLYASVNPEYFSAAD   |     |
| <i>M.lucifugus</i> | AAFDSIAHLVIALPIAIVLTVLGLALILYIHR            | RRKRNSNRGNGVLYASVNPEYFSAAD   |     |
| megabat            | TTYENFMHLIIALPVAIILLIVGGLVIMLYVFH           | RRKRNSNRGNGVLYASVNPEYFSAAD   |     |
| horse              | TTYENFIHLIIALPVAVLLIVGGLVIMLYVFH            | HRKRNNNSRLGNGVLYASVNPEYFSAAD |     |
| gorilla            | TGYENFIHLIIALPVAVLLIVGGLVIMLYVFH            | HRKRNNNSRLGNGVLYASVNPEYFSAAD |     |
| rabbit             | ATYESFMHLIIALPVAIILLIVGGLVIMLYVFH           | RRKRNSNRGNGVLYASVNPEYFSAAD   |     |
| chimp              | TGYENFIHLIIALPVAVLLIVGGLVIMLYVFH            | HRKRNNNSRLGNGVLYASVNPEYFSAAD |     |
| mouse lemur        | TGYENFIHLIIALPVAVLLIVGGLVIMLYVFH            | HRKRNNNSRLGNGVLYASVNPEYFSAAD |     |
| guinea pig         | TTYENFIHLIIALPVAIILLIVAGLAIMLYVFH           | RRKRNSNRGNGVLYASVNPEYFSAAD   |     |
| elephant           | IRYENFIHLIISVPVAALLIVGGLVIMLYVFH            | RRKRNNNSRLGNGVLYASVNPEYFSAAD |     |
| rock hyrax         | QRYENFIHLIISVPVAALLIVGGLVIMLYVFH            | RRKRSSSRGNGVLYASVNPEYFSAAD   |     |
| dolphin            | TTYENFIHLIIALPIAVLLIVGGLVIMLYVFH            | RRKRNNNSRLGNGVLYASVNPEYFSAAD |     |
| cat                | ITYENFIHLIIALPVAVLLIVGGLVIMLYVFH            | RRKRNNNSRLGNGVLYASVNPEYFSAAD |     |
| baboon             | TGYENFIHLIIALPVAVLLIVGGLVIMLYVFH            | RRKRNNNSRLGNGVLYASVNPEYFSAAD |     |
| tarsier            | TGYENFIHLIIALPVAVLLIVGGLVIMLYVFH            | RRKRNNNSRLGNGVLYASVNPEYFSAAD |     |
| rhesus             | TGYENFIHLIIALPVAVLLIVGGLVIMLYVFH            | RRKRNNNSRLGNGVLYASVNPEYFSAAD |     |
| tree shrew         | GTYDTFIHLIIVALPVAVLLIVGGLVIMLYVFH           | RRKRNNNSRLGNGVLYASVNPEYFSAAD |     |
| dog                | ITYENFIHLIIALPVAVLLIVGGLVIMLYVFH            | RRKRNNNSRLGNGVLYASVNPEYFSAAD |     |
| kangaroo rat       | TTYENFMHLIIALPVAIVLIVGGLVIMLYVFH            | RRKRNNNSRLGNGVLYASVNPEYFSAAD |     |
| orangutan          | TGYENFIHLIIALPVAVLLIVGGLVIMLYVFH            | RRKRNNNSRLGNGVLYASVNPEYFSAAD |     |
| marmoset           | TGYENFIHLIIALPIAVLLIVGGLVIMLYVFH            | RRKRNSNRGNGVLYASVNPEYFSAAD   |     |
| squirrel           | TTYENFIHLIIALPVAIILLIVGGLVIMLYVFH           | RRKRNNNSRLGNGVLYASVNPEYFSAAD |     |
| mouse              | TTYENFMHLIIALPVAIILLIVGGLVIMLYVFH           | RRKRNNNSRLGNGVLYASVNPEYFSAAD |     |
| rat                | TTYENFMHLIIALPVAIILLIVGGLVIMLYVFH           | RRKRNNNSRLGNGVLYASVNPEYFSAAD |     |
| cow                | TTYENFIHLMIALPIAVLLIVGGLVIMLYVFH            | RRKRNSNRGNGVLYASVNPEYFSAAD   |     |
| bushbaby           | TGYENFIHLIIALPVAVLLIVGGLVIMLYVFH            | RRKRNNNSRLGNGVLYASVNPEYFSAAD |     |
|                    | :... **:::*. * : * * * : ** : **.* ..*..... |                              |     |

**Supplementary Figure S16 | Unique amino acid residues in Vespertilionoidea bat IGF1R.** Alignment of mammalian *IGF1R*-encoded sequences is shown. Transmembrane domains are highlighted in orange and unique amino acids in *Myotis* in red. Blue font indicates amino acid sites under positive selection in bats in the genus *Myotis* ( $P < 0.05$  and with a Bayes empirical bayes (BEB) probability  $>95\%$  under the branch-site model in CodeML ( $n=27$ ) with a guide tree predicted by PRANK and *M. brandtii* and *M. lucifugus* examined separately as foreground branches). A star (\*) indicates a highly conserved amino acid. Residues with similar charge properties are indicated by a colon (:). Amino acids unique to the *Myotis* and conserved in all other mammals except the candidate low-coverage bushbaby genome (1.9X) ortholog are highlighted in grey.

**a**

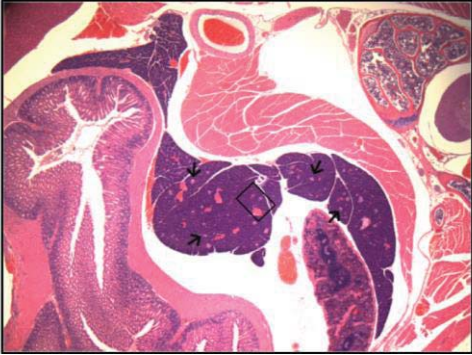

**b**

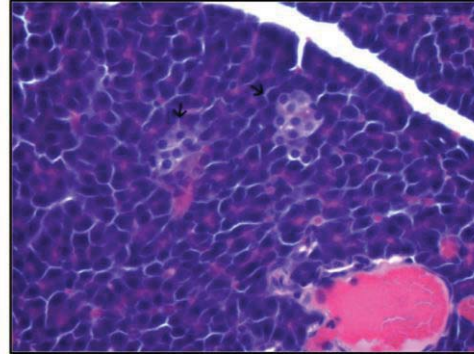

**Supplementary Figure S17 | Diminished size of islets of Langerhans in *M. brandtii*.** The pancreas (arrows) stains more deeply with Hematoxylin than do pancreata from other animals since there are fewer xymogen granules in exocrine cells. The islets are tiny and cannot be seen at this magnification (**a**, x4). At higher magnification (**b**, x60) tiny islets with 5-6 cells can be seen.



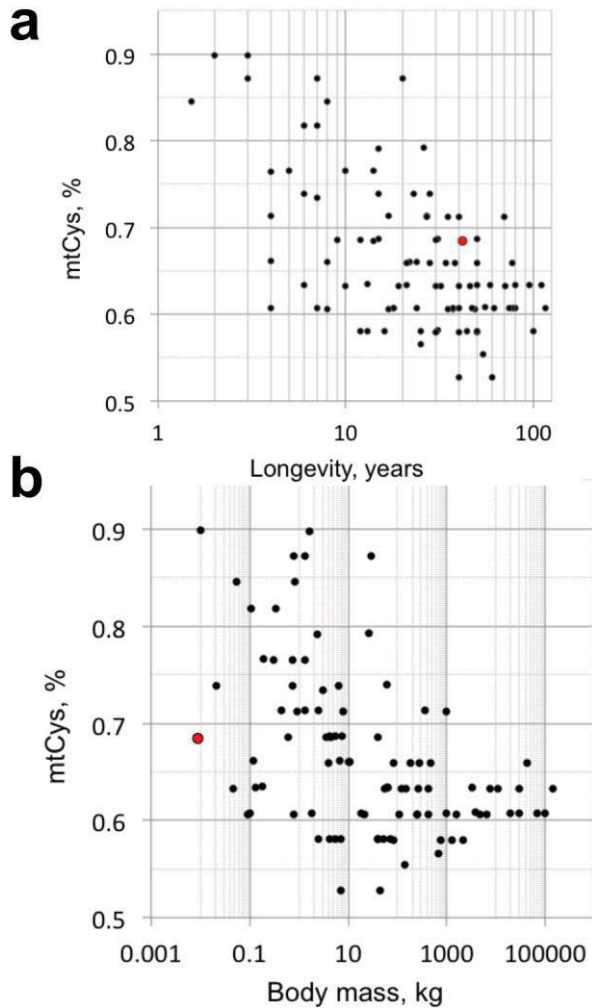

**Supplementary Figure S19 | Low cysteine content of *M. brandtii* mt-encoded proteins.** Cysteine content of proteins encoded by mitochondrial DNA (mtCys, in % of all amino acids encoded by mitochondrial DNA) in 95 mammals is plotted against their maximum lifespan (**a**) and body mass (**b**). Data were obtained from AnAge. Brandt's bat is shown by a red dot. Negative correlations between mtCys and lifespan, and between mtCys and body mass, suggest that the Brandt's bat's lifespan is slightly above that expected based on its mtCys content, whereas its body mass is substantially lower than that expected from its mtCys content.

## SUPPLEMENTARY TABLES

Supplementary Table S1 | Data production.

| Pair-end libraries | Insert Size | Total Data (Gb) | Reads Length (bp) | Sequence coverage (X)* | Physical coverage (X) |
|--------------------|-------------|-----------------|-------------------|------------------------|-----------------------|
| Illumina Reads     | 170bp       | 54.39           | 91                | 27.20                  | 25.54                 |
|                    | 500bp       | 22.84           | 93                | 11.42                  | 30.69                 |
|                    | 800bp       | 24.01           | 91                | 12.01                  | 53.07                 |
|                    | 2kb         | 20.69           | 49                | 10.35                  | 211.17                |
|                    | 5kb         | 17.07           | 49                | 8.54                   | 435.49                |
|                    | 10kb        | 12.35           | 49                | 6.17                   | 629.95                |
|                    | 20kb        | 4.37            | 49                | 2.18                   | 445.45                |
| Total              | -----       | 155.72          | -----             | 77.86                  | 1,831.36              |

\*assuming 2 Gb genome size

**Supplementary Table S2 | Statistics of the assembly.**

| <b>Index</b>  | <b>Contig</b>      |               | <b>Scaffold</b>    |               |
|---------------|--------------------|---------------|--------------------|---------------|
|               | <b>Length (bp)</b> | <b>Number</b> | <b>Length (bp)</b> | <b>Number</b> |
| N90           | 2,339              | 121,024       | 223,054            | 965           |
| N80           | 7,295              | 75,302        | 962,962            | 563           |
| N70           | 11,635             | 53,238        | 1,597,504          | 387           |
| N60           | 16,175             | 38,330        | 2,305,849          | 273           |
| N50           | 21,110             | 27,229        | 3,111,371          | 192           |
| Total length  | 2,052,216,787      |               | 2,177,979,242      |               |
| Max. length   | 217,926            |               | 22,122,726         |               |
| Number>100bp  | 844,285            |               | 677,946            |               |
| Number>2000bp | 126,755            |               | 4,835              |               |

**Supplementary Table S3 | Statistics of high quality short insert size read mapping.**

| Sample                 | Genome size (M) | Effective size (M) | Raw Data  |          | Mapped Data |       |          |       |       | depth | Coverage (M) | %     |
|------------------------|-----------------|--------------------|-----------|----------|-------------|-------|----------|-------|-------|-------|--------------|-------|
|                        |                 |                    | Reads (M) | Base (M) | Reads(M)    | %     | Base (M) | %     | PE%*  |       |              |       |
| <i>Myotis brandtii</i> | 2,178           | 2,052              | 799       | 72,876   | 769         | 96.28 | 70,168   | 96.28 | 94.39 | 34.19 | 2,031        | 98.97 |

\*PE% indicates the proportion of reads that were proper paired mapping to genome with the reasonable insert size associated with the library we built.

**Supplementary Table S4 | Heterozygosity ratio of *M. brandtii*.**

| Sample                 | Genome size (Mbp) | Effective size (removing gaps, Mbp) | Sequencing depth (X) | SNP       |       | InDel     |       |
|------------------------|-------------------|-------------------------------------|----------------------|-----------|-------|-----------|-------|
|                        |                   |                                     |                      | #Hete     | %Hete | #Hete     | %Hete |
| <i>Myotis brandtii</i> | 2,178             | 2,052                               | 34.19                | 7,312,602 | 0.371 | 1,271,833 | 0.065 |



**Supplementary Table S5 | Comparison of transposable elements in mammalian genomes.**

|         | <i>Myotis brandtii</i> |          | Human       |          | Macaque     |          | Mouse       |          | Rat         |          | Dog         |          |
|---------|------------------------|----------|-------------|----------|-------------|----------|-------------|----------|-------------|----------|-------------|----------|
|         | Length (Mp)            | % genome | Length (Mp) | % genome | Length (Mp) | % genome | Length (Mp) | % genome | Length (Mp) | % genome | Length (Mp) | % genome |
| DNA     | 87.78                  | 4.03     | 102.4       | 3.3      | 80.1        | 2.58     | 63.7        | 2.3      | 66.8        | 2.5      | 68.3        | 2.7      |
| LINE    | 250.97                 | 11.52    | 543         | 17.5     | 395.4       | 12.77    | 495.3       | 18.2     | 529.5       | 19.5     | 418.6       | 16.54    |
| LTR     | 100.53                 | 4.62     | 257.2       | 8.3      | 192.7       | 6.22     | 283.9       | 10.4     | 220.8       | 8.1      | 114.7       | 4.5      |
| SINE    | 32.36                  | 1.49     | 349.4       | 11.3     | 279.2       | 9.02     | 166.7       | 6.1      | 144.6       | 5.3      | 226.7       | 8.9      |
| Other   | 0.01                   | 0        | 26.4        | 0.9      | 5.6         | 0.18     | 7.6         | 0.3      | 6.8         | 0.2      | 0.008       | 0        |
| Unknown | 14.75                  | 0.68     | 4.8         | 0.2      | 2.7         | 0.09     | 43.7        | 1.6      | 50.7        | 1.9      | 1.1         | 0.04     |
| Total   | 483.06                 | 22.17    | 1,257.70    | 40.5     | 955.7       | 30.86    | 1,017       | 37.4     | 978         | 36       | 822.8       | 32.5     |

**Supplementary Table S6 | Statistics of gene parameters.**

| <b>Gene set</b>     | <b>Number</b> | <b>complete ORF</b> | <b>%</b> | <b>Single Exon gene</b> | <b>%</b> | <b>Average gene length (bp)</b> | <b>Average CDS length (bp)</b> | <b>Average exons per gene</b> | <b>Average exon length (bp)</b> | <b>Average intron length (bp)</b> |
|---------------------|---------------|---------------------|----------|-------------------------|----------|---------------------------------|--------------------------------|-------------------------------|---------------------------------|-----------------------------------|
| <i>M.brandtii</i>   | 22,256        | 21,199              | 95.25    | 3,348                   | 15.04    | 32,464                          | 1,501                          | 8.50                          | 177                             | 4,243                             |
| <i>E caballus</i>   | 20,383        | 10,096              | 49.53    | 3,323                   | 16.30    | 32,268                          | 1,532                          | 9.28                          | 165                             | 3,713                             |
| <i>C.familiaris</i> | 19,281        | 8,985               | 46.60    | 1,208                   | 6.27     | 30,994                          | 1,578                          | 9.90                          | 159                             | 3,305                             |
| <i>M.musculus</i>   | 22,837        | 21,214              | 92.89    | 4,198                   | 18.38    | 36,630                          | 1,515                          | 8.56                          | 177                             | 4,646                             |
| <i>R.norvegicus</i> | 22,841        | 16,745              | 73.31    | 3,552                   | 15.55    | 30,892                          | 1,452                          | 8.59                          | 169                             | 3,879                             |
| <i>B.taurus</i>     | 19,970        | 14,629              | 73.25    | 2,459                   | 12.31    | 35,523                          | 1,599                          | 9.59                          | 167                             | 3,949                             |
| <i>H.sapiens</i>    | 22,389        | 20,098              | 89.77    | 3,318                   | 14.82    | 44,855                          | 1,560                          | 8.96                          | 174                             | 5,436                             |
| <i>H.glaber</i>     | 22,561        | 19,137              | 84.82    | 3,930                   | 17.42    | 32,533                          | 1,439                          | 8.05                          | 179                             | 4,410                             |

**Supplementary Table S7 | Functional classification of *M. brandtii* genes.**

|             |            | <b>Number</b> | <b>Percent (%)</b> |
|-------------|------------|---------------|--------------------|
| Total       |            | 22,256        | 100                |
|             | SWISS-PROT | 20,725        | 93.13              |
|             | KEGG       | 9,158         | 41.15              |
| Annotated   | InterPro   | 19,665        | 88.36              |
|             | GO         | 15,883        | 71.37              |
| Unannotated |            | 1,512         | 6.79               |

**Supplementary Table S8 | Orthologous relationship between *M. brandtii* and mammals.**

| Type                            | Ortholog number |
|---------------------------------|-----------------|
| <i>M.brandtii: E.caballus</i>   | 14,140          |
| <i>M.brandtii: C.familiaris</i> | 13,997          |
| <i>M.brandtii: B.taurus</i>     | 14,345          |
| <i>M.brandtii: H.sapiens</i>    | 14,212          |
| <i>M.brandtii: M.musculus</i>   | 14,095          |
| <i>M.brandtii: R.norvegicus</i> | 13,420          |
| 1:1 ortholog                    | 10,374          |

**Supplementary Table S9 | *Myotis brandtii* gained genes compared to human.**

| GeneID                            | Gene Symbol     | Gene Name                                                                         |
|-----------------------------------|-----------------|-----------------------------------------------------------------------------------|
| Myotis_brandtii_GOT2_10010193     | <i>GOT2</i>     | glutamic-oxaloacetic transaminase 2, mitochondrial (aspartate aminotransferase 2) |
| Myotis_brandtii_GOT2_10010194     | <i>GOT2</i>     | glutamic-oxaloacetic transaminase 2, mitochondrial (aspartate aminotransferase 2) |
| Myotis_brandtii_Armc5_10025112    | <i>ARMC5</i>    | armadillo repeat containing 5                                                     |
| Myotis_brandtii_ATP8B3_10024502   | <i>ATP8B3</i>   | probable phospholipid-transporting ATPase IK-like                                 |
| Myotis_brandtii_ATP8B3_10024504   | <i>ATP8B3</i>   | probable phospholipid-transporting ATPase IK-like                                 |
| Myotis_brandtii_ATP8B3_10024505   | <i>ATP8B3</i>   | probable phospholipid-transporting ATPase IK-like                                 |
| Myotis_brandtii_BAG6_10034716     | <i>BAG6</i>     | BCL2-associated athanogene 6                                                      |
| Myotis_brandtii_Atg14_10033117    | <i>ATG14</i>    | autophagy related 14                                                              |
| Myotis_brandtii_Atg14_10033118    | <i>ATG14</i>    | autophagy related 14                                                              |
| Myotis_brandtii_CASP8AP2_10032158 | <i>CASP8AP2</i> | caspase 8 associated protein 2                                                    |
| Myotis_brandtii_CADM1_10028129    | <i>CADMI</i>    | cell adhesion molecule 1                                                          |
| Myotis_brandtii_CDAN1_10035881    | <i>CDAN1</i>    | congenital dyserythropoietic anemia, type I                                       |
| Myotis_brandtii_Cdan1_10035882    | <i>CDAN1</i>    | congenital dyserythropoietic anemia, type I (human)                               |
| Myotis_brandtii_Chchd5_10032912   | <i>CHCHD5</i>   | coiled-coil-helix-coiled-coil-helix domain containing 5                           |
| Myotis_brandtii_CHIA_10030030     | <i>CHIA</i>     | chitinase, acidic                                                                 |
| Myotis_brandtii_CKAP2_10031257    | <i>CKAP2</i>    | cytoskeleton associated protein 2                                                 |
| Myotis_brandtii_NA_10028549       | <i>NA</i>       | NA                                                                                |
| Myotis_brandtii_CLDND1_10030172   | <i>CLDND1</i>   | claudin domain containing 1                                                       |
| Myotis_brandtii_C14orf43_10010219 | <i>C14ORF43</i> | chromosome 14 open reading frame 43                                               |
| Myotis_brandtii_Nudt21_10029674   | <i>NUDT21</i>   | nudix (nucleoside diphosphate linked moiety X)-type motif 21                      |
| Myotis_brandtii_SLC7A3_10035698   | <i>SLC7A3</i>   | solute carrier family 7 (cationic amino acid transporter, y+ system), member 3    |
| Myotis_brandtii_Cull1_10034861    | <i>CUL1</i>     | cullin 1                                                                          |
| Myotis_brandtii_Cwc25_10032337    | <i>CWC25</i>    | CWC25 spliceosome-associated protein homolog ( <i>S. cerevisiae</i> )             |
| Myotis_brandtii_CWC25_10032338    | <i>CWC25</i>    | similar to putative spliceosomal complex component                                |
| Myotis_brandtii_CYCS_10032985     | <i>CYCS</i>     | cytochrome c, somatic                                                             |
| Myotis_brandtii_DAZAP2_10018817   | <i>DAZAP2</i>   | DAZ associated protein 2                                                          |
| Myotis_brandtii_DDX5_10025247     | <i>DDX5</i>     | DEAD (Asp-Glu-Ala-Asp) box polypeptide 5                                          |
| Myotis_brandtii_DHX8_10026498     | <i>DHX8</i>     | DEAH (Asp-Glu-Ala-His) box polypeptide 8                                          |
| Myotis_brandtii_DHX8_10026499     | <i>DHX8</i>     | DEAH (Asp-Glu-Ala-His) box polypeptide 8                                          |
| Myotis_brandtii_NA_10009523       | <i>NA</i>       | NA                                                                                |
| Myotis_brandtii_ECAT1_10027163    | <i>ECAT1</i>    | ES cell associated transcript 1                                                   |
| Myotis_brandtii_ECE2_10035161     | <i>ECE2</i>     | family M13 non-peptidase homologue (M13 family)                                   |
| Myotis_brandtii_eef1a_10009184    | <i>EEF1A</i>    | elongation factor 1-alpha                                                         |
| Myotis_brandtii_EEF1A1_10009185   | <i>EEF1A1</i>   | eukaryotic translation elongation factor 1 alpha 1                                |
| Myotis_brandtii_Eef1a1_10020724   | <i>EEF1A1</i>   | eukaryotic translation elongation factor 1 alpha 1                                |
| Myotis_brandtii_EEF1A1_10020725   | <i>EEF1A1</i>   | eukaryotic translation elongation factor 1 alpha 1                                |
| Myotis_brandtii_EEF1A1_10029169   | <i>EEF1A1</i>   | eukaryotic translation elongation factor 1 alpha 1                                |
| Myotis_brandtii ETF1_10017428     | <i>ETF1</i>     | eukaryotic translation termination factor 1                                       |
| Myotis_brandtii_FAM48A_10010229   | <i>FAM48A</i>   | family with sequence similarity 48, member A                                      |
| Myotis_brandtii_FBXO31_10011222   | <i>FBXO31</i>   | F-box protein 31                                                                  |
| Myotis_brandtii_FBXO31_10023009   | <i>FBXO31</i>   | F-box protein 31                                                                  |
| Myotis_brandtii_FBXO31_10024405   | <i>FBXO31</i>   | F-box protein 31                                                                  |
| Myotis_brandtii_FBXO31_10029175   | <i>FBXO31</i>   | F-box protein 31                                                                  |
| Myotis_brandtii_FBXO31_10034120   | <i>FBXO31</i>   | F-box protein 31                                                                  |
| Myotis_brandtii_FOP_10032407      | <i>FOP</i>      | NA                                                                                |
| Myotis_brandtii_PTGFRN_10014937   | <i>PTGFRN</i>   | prostaglandin F2 receptor negative regulator-like                                 |

|                                   |          |                                                                                                |
|-----------------------------------|----------|------------------------------------------------------------------------------------------------|
| Myotis_brandtii_NA_10008666       | NA       | NA                                                                                             |
| Myotis_brandtii_FTH1_10032500     | FTH1     | potential iron transporter similar to <i>S. cerevisiae</i> FTH1 (YBR207W)                      |
| Myotis_brandtii_FTH1_10034417     | FTH1     | potential iron transporter similar to <i>S. cerevisiae</i> FTH1 (YBR207W)                      |
| Myotis_brandtii_FTL_10019016      | FTL      | ferritin, light polypeptide                                                                    |
| Myotis_brandtii_FTL_10023160      | FTL      | ferritin, light polypeptide                                                                    |
| Myotis_brandtii_FTL_10027963      | FTL      | ferritin, light polypeptide                                                                    |
| Myotis_brandtii_FTL_10032313      | FTL      | ferritin, light polypeptide                                                                    |
| Myotis_brandtii_FTL_10033417      | FTL      | ferritin, light polypeptide                                                                    |
| Myotis_brandtii_FTL_10033419      | FTL      | ferritin, light polypeptide                                                                    |
| Myotis_brandtii_FTL_10035612      | FTL      | ferritin, light polypeptide                                                                    |
| Myotis_brandtii_FTL_10035765      | FTL      | ferritin, light polypeptide                                                                    |
| Myotis_brandtii_Ftl1_10018904     | FTL1     | ferritin light chain 1                                                                         |
| Myotis_brandtii_FUNDC2_10012321   | FUNDC2   | FUN14 domain containing 2                                                                      |
| Myotis_brandtii_GAPDH_10022408    | GAPDH    | hypothetical protein                                                                           |
| Myotis_brandtii_GAPDH_10022409    | GAPDH    | hypothetical protein                                                                           |
| Myotis_brandtii_GAPDH_10022547    | GAPDH    | hypothetical protein                                                                           |
| Myotis_brandtii_GAPDH_10023219    | GAPDH    | hypothetical protein                                                                           |
| Myotis_brandtii_GALNT11_10009460  | GALNT11  | UDP-N-acetyl-alpha-D-galactosamine:polypeptide acetylgalactosaminyltransferase 11 (GalNAc-T11) |
| Myotis_brandtii_Galnt11_10009461  | GALNT11  | UDP-N-acetyl-alpha-D-galactosamine:polypeptide acetylgalactosaminyltransferase 11 (GalNAc-T11) |
| Myotis_brandtii_GLTP_10026468     | GLTP     | glycolipid transfer protein                                                                    |
| Myotis_brandtii_GLTP_10026469     | GLTP     | glycolipid transfer protein                                                                    |
| Myotis_brandtii_GLTP_10028392     | GLTP     | glycolipid transfer protein                                                                    |
| Myotis_brandtii_GOLIM4_10035910   | GOLIM4   | golgi integral membrane protein 4                                                              |
| Myotis_brandtii_Gpbp1_10012594    | GPBP1    | GC-rich promoter binding protein 1                                                             |
| Myotis_brandtii_Hmgb2_10018437    | HMGB2    | high mobility group box 2                                                                      |
| Myotis_brandtii_Hmgb2_10029741    | HMGB2    | high mobility group box 2                                                                      |
| Myotis_brandtii_HMGN1_10032322    | HMGN1    | uncharacterized LOC709908                                                                      |
| Myotis_brandtii_HMGN4_10023816    | HMGN4    | non-histone chromosomal protein HMG-17-like                                                    |
| Myotis_brandtii_HNRNPH2_10028411  | HNRNPH2  | heterogeneous nuclear ribonucleoprotein H2-like                                                |
| Myotis_brandtii_Ift122_10023372   | IFT122   | intraflagellar transport 122 homolog ( <i>Chlamydomonas</i> )                                  |
| Myotis_brandtii_IGF2BP2_10033173  | IGF2BP2  | insulin-like growth factor 2 mRNA binding protein 2                                            |
| Myotis_brandtii	EIF2S3_10023015   | EIF2S3   | eukaryotic translation initiation factor 2, subunit 3 gamma, 52kDa                             |
| Myotis_brandtii_Eif4a3_10031650   | EIF4A3   | eukaryotic translation initiation factor 4A, isoform 3                                         |
| Myotis_brandtii	EIF5_10035634     | EIF5     | eukaryotic translation initiation factor 5                                                     |
| Myotis_brandtii_IFT20_10028766    | IFT20    | intraflagellar transport protein 20                                                            |
| Myotis_brandtii_ILF2_10018503     | ILF2     | interleukin enhancer binding factor 2, 45kDa                                                   |
| Myotis_brandtii_ILF2_10019357     | ILF2     | interleukin enhancer binding factor 2, 45kDa                                                   |
| Myotis_brandtii_ILF2_10026032     | ILF2     | interleukin enhancer binding factor 2, 45kDa                                                   |
| Myotis_brandtii_KPNA2_10012583    | KPNA2    | NA                                                                                             |
| Myotis_brandtii_Kpna2_10018010    | KPNA2    | karyopherin (importin) alpha 2                                                                 |
| Myotis_brandtii_Ino80c_10034875   | INO80C   | INO80 complex subunit C                                                                        |
| Myotis_brandtii_Ing1_10032312     | ING1     | inhibitor of growth family, member 1                                                           |
| Myotis_brandtii_IPO4_10023804     | IPO4     | importin-4-like                                                                                |
| Myotis_brandtii_KIAA0174_10022418 | KIAA0174 | KIAA0174                                                                                       |
| Myotis_brandtii_Kif15_10035048    | KIF15    | kinesin family member 15                                                                       |
| Myotis_brandtii_LSM14A_10008869   | LSM14A   | LSM14A, SCD6 homolog A ( <i>S. cerevisiae</i> )                                                |
| Myotis_brandtii_LSM7_10028402     | LSM7     | small nuclear riboprotein, U6 sm-like protein                                                  |
| Myotis_brandtii_MARK3_10026910    | MARK3    | MAP/microtubule affinity-regulating kinase 3-like                                              |
| Myotis_brandtii_MAST2_10035163    | MAST2    | microtubule associated serine/threonine kinase 2                                               |

|                                  |                |                                                         |
|----------------------------------|----------------|---------------------------------------------------------|
| Myotis_brandtii_ORF61_10015816   | <i>ORF61</i>   | uracil-DNA glycosylase                                  |
| Myotis_brandtii_MAD2L1_10018893  | <i>MAD2L1</i>  | MAD2 mitotic arrest deficient-like 1 (yeast)            |
| Myotis_brandtii_Med22_10028621   | <i>MED22</i>   | mediator complex subunit 22                             |
| Myotis_brandtii_Chchd4_10019427  | <i>CHCHD4</i>  | coiled-coil-helix-coiled-coil-helix domain containing 4 |
| Myotis_brandtii_MDK_10033218     | <i>MDK</i>     | midkine (neurite growth-promoting factor 2)             |
| Myotis_brandtii_NA_10020689      | <i>NA</i>      | NA                                                      |
| Myotis_brandtii_MMGT1_10033995   | <i>MMGT1</i>   | membrane magnesium transporter 1                        |
| Myotis_brandtii_Morf4l1_10018151 | <i>MORF4L1</i> | mortality factor 4 like 1                               |
| Myotis_brandtii_Morf4l1_10018152 | <i>MORF4L1</i> | mortality factor 4 like 1                               |
| Myotis_brandtii_CDC25A_10034525  | <i>CDC25A</i>  | cell division cycle 25 homolog A (S. pombe)             |
| Myotis_brandtii_NA_10002569      | <i>NA</i>      | NA                                                      |
| Myotis_brandtii_NA_10002743      | <i>NA</i>      | NA                                                      |
| Myotis_brandtii_NA_10002888      | <i>NA</i>      | NA                                                      |
| Myotis_brandtii_NA_10004088      | <i>NA</i>      | NA                                                      |
| Myotis_brandtii_NA_10004402      | <i>NA</i>      | NA                                                      |
| Myotis_brandtii_NA_10004641      | <i>NA</i>      | NA                                                      |
| Myotis_brandtii_NA_10004981      | <i>NA</i>      | NA                                                      |
| Myotis_brandtii_NA_10005083      | <i>NA</i>      | NA                                                      |
| Myotis_brandtii_NA_10005157      | <i>NA</i>      | NA                                                      |
| Myotis_brandtii_NA_10005875      | <i>NA</i>      | NA                                                      |
| Myotis_brandtii_NA_10006509      | <i>NA</i>      | NA                                                      |
| Myotis_brandtii_NA_10006856      | <i>NA</i>      | NA                                                      |
| Myotis_brandtii_NA_10006871      | <i>NA</i>      | NA                                                      |
| Myotis_brandtii_NA_10007122      | <i>NA</i>      | NA                                                      |
| Myotis_brandtii_NA_10007161      | <i>NA</i>      | NA                                                      |
| Myotis_brandtii_NA_10007227      | <i>NA</i>      | NA                                                      |
| Myotis_brandtii_NA_10007256      | <i>NA</i>      | NA                                                      |
| Myotis_brandtii_NA_10007652      | <i>NA</i>      | NA                                                      |
| Myotis_brandtii_NA_10008258      | <i>NA</i>      | NA                                                      |
| Myotis_brandtii_NA_10009448      | <i>NA</i>      | NA                                                      |
| Myotis_brandtii_NA_10009703      | <i>NA</i>      | NA                                                      |
| Myotis_brandtii_NA_10010161      | <i>NA</i>      | NA                                                      |
| Myotis_brandtii_NA_10010310      | <i>NA</i>      | NA                                                      |
| Myotis_brandtii_NA_10010447      | <i>NA</i>      | NA                                                      |
| Myotis_brandtii_NA_10011326      | <i>NA</i>      | NA                                                      |
| Myotis_brandtii_NA_10011610      | <i>NA</i>      | NA                                                      |
| Myotis_brandtii_NA_10011705      | <i>NA</i>      | NA                                                      |
| Myotis_brandtii_NA_10011708      | <i>NA</i>      | NA                                                      |
| Myotis_brandtii_NA_10012326      | <i>NA</i>      | NA                                                      |
| Myotis_brandtii_NA_10012473      | <i>NA</i>      | NA                                                      |
| Myotis_brandtii_NA_10012953      | <i>NA</i>      | NA                                                      |
| Myotis_brandtii_NA_10013740      | <i>NA</i>      | NA                                                      |
| Myotis_brandtii_NA_10013744      | <i>NA</i>      | NA                                                      |
| Myotis_brandtii_NA_10013840      | <i>NA</i>      | NA                                                      |
| Myotis_brandtii_NA_10013967      | <i>NA</i>      | NA                                                      |
| Myotis_brandtii_NA_10014175      | <i>NA</i>      | NA                                                      |
| Myotis_brandtii_NA_10014178      | <i>NA</i>      | NA                                                      |
| Myotis_brandtii_NA_10014372      | <i>NA</i>      | NA                                                      |
| Myotis_brandtii_NA_10014558      | <i>NA</i>      | NA                                                      |
| Myotis_brandtii_NA_10014607      | <i>NA</i>      | NA                                                      |
| Myotis_brandtii_NA_10015233      | <i>NA</i>      | NA                                                      |

|                             |    |    |
|-----------------------------|----|----|
| Myotis_brandtii_NA_10015949 | NA | NA |
| Myotis_brandtii_NA_10016154 | NA | NA |
| Myotis_brandtii_NA_10016161 | NA | NA |
| Myotis_brandtii_NA_10016917 | NA | NA |
| Myotis_brandtii_NA_10017018 | NA | NA |
| Myotis_brandtii_NA_10017047 | NA | NA |
| Myotis_brandtii_NA_10017128 | NA | NA |
| Myotis_brandtii_NA_10017586 | NA | NA |
| Myotis_brandtii_NA_10017665 | NA | NA |
| Myotis_brandtii_NA_10017748 | NA | NA |
| Myotis_brandtii_NA_10017811 | NA | NA |
| Myotis_brandtii_NA_10017938 | NA | NA |
| Myotis_brandtii_NA_10017970 | NA | NA |
| Myotis_brandtii_NA_10018308 | NA | NA |
| Myotis_brandtii_NA_10018566 | NA | NA |
| Myotis_brandtii_NA_10019025 | NA | NA |
| Myotis_brandtii_NA_10019152 | NA | NA |
| Myotis_brandtii_NA_10019168 | NA | NA |
| Myotis_brandtii_NA_10019212 | NA | NA |
| Myotis_brandtii_NA_10020562 | NA | NA |
| Myotis_brandtii_NA_10020821 | NA | NA |
| Myotis_brandtii_NA_10020847 | NA | NA |
| Myotis_brandtii_NA_10021344 | NA | NA |
| Myotis_brandtii_NA_10021367 | NA | NA |
| Myotis_brandtii_NA_10021372 | NA | NA |
| Myotis_brandtii_NA_10021549 | NA | NA |
| Myotis_brandtii_NA_10021553 | NA | NA |
| Myotis_brandtii_NA_10021775 | NA | NA |
| Myotis_brandtii_NA_10021854 | NA | NA |
| Myotis_brandtii_NA_10021970 | NA | NA |
| Myotis_brandtii_NA_10022983 | NA | NA |
| Myotis_brandtii_NA_10023189 | NA | NA |
| Myotis_brandtii_NA_10023338 | NA | NA |
| Myotis_brandtii_NA_10023440 | NA | NA |
| Myotis_brandtii_NA_10023468 | NA | NA |
| Myotis_brandtii_NA_10023644 | NA | NA |
| Myotis_brandtii_NA_10023905 | NA | NA |
| Myotis_brandtii_NA_10023910 | NA | NA |
| Myotis_brandtii_NA_10024174 | NA | NA |
| Myotis_brandtii_NA_10024175 | NA | NA |
| Myotis_brandtii_NA_10024182 | NA | NA |
| Myotis_brandtii_NA_10024576 | NA | NA |
| Myotis_brandtii_NA_10024999 | NA | NA |
| Myotis_brandtii_NA_10026089 | NA | NA |
| Myotis_brandtii_NA_10026266 | NA | NA |
| Myotis_brandtii_NA_10026296 | NA | NA |
| Myotis_brandtii_NA_10027166 | NA | NA |
| Myotis_brandtii_NA_10027436 | NA | NA |
| Myotis_brandtii_NA_10027464 | NA | NA |
| Myotis_brandtii_NA_10027566 | NA | NA |
| Myotis_brandtii_NA_10027642 | NA | NA |



|                                 |               |                                                                                            |
|---------------------------------|---------------|--------------------------------------------------------------------------------------------|
| Myotis_brandtii_NA_10028011     | NA            | NA                                                                                         |
| Myotis_brandtii_NA_10028399     | NA            | NA                                                                                         |
| Myotis_brandtii_NA_10028515     | NA            | NA                                                                                         |
| Myotis_brandtii_NA_10028663     | NA            | NA                                                                                         |
| Myotis_brandtii_NA_10029400     | NA            | NA                                                                                         |
| Myotis_brandtii_NA_10029618     | NA            | NA                                                                                         |
| Myotis_brandtii_NA_10029906     | NA            | NA                                                                                         |
| Myotis_brandtii_NA_10029949     | NA            | NA                                                                                         |
| Myotis_brandtii_NA_10029996     | NA            | NA                                                                                         |
| Myotis_brandtii_NA_10030171     | NA            | NA                                                                                         |
| Myotis_brandtii_NA_10030289     | NA            | NA                                                                                         |
| Myotis_brandtii_NA_10030295     | NA            | NA                                                                                         |
| Myotis_brandtii_NA_10030357     | NA            | NA                                                                                         |
| Myotis_brandtii_NA_10030731     | NA            | NA                                                                                         |
| Myotis_brandtii_NA_10030833     | NA            | NA                                                                                         |
| Myotis_brandtii_NA_10030848     | NA            | NA                                                                                         |
| Myotis_brandtii_NA_10030940     | NA            | NA                                                                                         |
| Myotis_brandtii_NA_10031024     | NA            | NA                                                                                         |
| Myotis_brandtii_NA_10031025     | NA            | NA                                                                                         |
| Myotis_brandtii_NA_10031156     | NA            | NA                                                                                         |
| Myotis_brandtii_NA_10031616     | NA            | NA                                                                                         |
| Myotis_brandtii_NA_10031853     | NA            | NA                                                                                         |
| Myotis_brandtii_NA_10031924     | NA            | NA                                                                                         |
| Myotis_brandtii_NA_10032193     | NA            | NA                                                                                         |
| Myotis_brandtii_NA_10032522     | NA            | NA                                                                                         |
| Myotis_brandtii_NA_10032738     | NA            | NA                                                                                         |
| Myotis_brandtii_NA_10033363     | NA            | NA                                                                                         |
| Myotis_brandtii_NA_10033981     | NA            | NA                                                                                         |
| Myotis_brandtii_NA_10034004     | NA            | NA                                                                                         |
| Myotis_brandtii_NA_10034437     | NA            | NA                                                                                         |
| Myotis_brandtii_NA_10034440     | NA            | NA                                                                                         |
| Myotis_brandtii_NA_10035064     | NA            | NA                                                                                         |
| Myotis_brandtii_NA_10035067     | NA            | NA                                                                                         |
| Myotis_brandtii_NA_10035085     | NA            | NA                                                                                         |
| Myotis_brandtii_NA_10035319     | NA            | NA                                                                                         |
| Myotis_brandtii_NA_10035336     | NA            | NA                                                                                         |
| Myotis_brandtii_NA_10035360     | NA            | NA                                                                                         |
| Myotis_brandtii_NA_10035375     | NA            | NA                                                                                         |
| Myotis_brandtii_NA_10035382     | NA            | NA                                                                                         |
| Myotis_brandtii_NA_10035470     | NA            | NA                                                                                         |
| Myotis_brandtii_NA_10035638     | NA            | NA                                                                                         |
| Myotis_brandtii_NA_10035697     | NA            | NA                                                                                         |
| Myotis_brandtii_NA_10035791     | NA            | NA                                                                                         |
| Myotis_brandtii_NA_10035973     | NA            | NA                                                                                         |
| Myotis_brandtii_NGRN_10022900   | <i>NGRN</i>   | neugrin, neurite outgrowth associated                                                      |
| Myotis_brandtii_Nhp211_10020694 | <i>NHP2L1</i> | NHP2 non-histone chromosome protein 2-like 1 (S. cerevisiae)                               |
| Myotis_brandtii_Nkap_10018116   | <i>NKAP</i>   | NFKB activating protein                                                                    |
| Myotis_brandtii_Nono_10029908   | <i>NONO</i>   | non-POU-domain-containing, octamer binding protein                                         |
| Myotis_brandtii_Nop10_10027797  | <i>NOP10</i>  | NOP10 ribonucleoprotein homolog (yeast)                                                    |
| Myotis_brandtii_NOP14_10018438  | <i>NOP14</i>  | similar to S. cerevisiae NOP14 (YDL148C) U3 snoRNP/small subunit rRNA processome component |

|                                 |               |                                                                                                                                                                           |
|---------------------------------|---------------|---------------------------------------------------------------------------------------------------------------------------------------------------------------------------|
| Myotis_brandtii_NSF_10022249    | <i>NSF</i>    | vesicle-fusing ATPase                                                                                                                                                     |
| Myotis_brandtii_NA_10006876     | <i>NA</i>     | NA                                                                                                                                                                        |
| Myotis_brandtii_PIK3R2_10024461 | <i>PIK3R2</i> | phosphoinositide-3-kinase, regulatory subunit 2 (beta)                                                                                                                    |
| Myotis_brandtii_PABPC4_10023698 | <i>PABPC4</i> | poly(A) binding protein, cytoplasmic 4 (inducible form)                                                                                                                   |
| Myotis_brandtii_PABPC4_10023699 | <i>PABPC4</i> | poly(A) binding protein, cytoplasmic 4 (inducible form)                                                                                                                   |
| Myotis_brandtii_PCID2_10033784  | <i>PCID2</i>  | PCI domain-containing protein 2                                                                                                                                           |
| Myotis_brandtii_Pcid2_10033785  | <i>PCID2</i>  | PCI domain-containing 2                                                                                                                                                   |
| Myotis_brandtii_Pdc13_10028014  | <i>PDCL3</i>  | phosducin-like 3                                                                                                                                                          |
| Myotis_brandtii_PEX5_10026123   | <i>PEX5</i>   | similar to <i>S. cerevisiae</i> PEX5 (YDR244W) receptor for peroxisomal targeting sequence 1                                                                              |
| Myotis_brandtii_PPP3CC_10028538 | <i>PPP3CC</i> | protein phosphatase 3, catalytic subunit, gamma isozyme                                                                                                                   |
| Myotis_brandtii_PRDX3_10023933  | <i>PRDX3</i>  | peroxiredoxin 3                                                                                                                                                           |
| Myotis_brandtii_PRDX5_10026214  | <i>PRDX5</i>  | peroxiredoxin 5                                                                                                                                                           |
| Myotis_brandtii_PTMA_10019120   | <i>PTMA</i>   | prothymosin, alpha (gene sequence 28)                                                                                                                                     |
| Myotis_brandtii_ATIC_10023696   | <i>ATIC</i>   | 5-aminoimidazole-4-carboxamide ribonucleotide formyltransferase/IMP cyclohydrolase                                                                                        |
| Myotis_brandtii_Ranbp1_10017823 | <i>RANBP1</i> | RAN binding protein 1                                                                                                                                                     |
| Myotis_brandtii_Rpl12_10003701  | <i>RPL12</i>  | ribosomal protein L12                                                                                                                                                     |
| Myotis_brandtii_RPL12_10026992  | <i>RPL12</i>  | similar to <i>S. cerevisiae</i> RPL12B (YDR418W) and RPL12A (YEL054C) genes for cytosolic large subunit ribosomal protein L12                                             |
| Myotis_brandtii_RPL13_10028769  | <i>RPL13</i>  | Ribosomal protein L13, component of cytosolic 80S ribosome and 60S large subunit                                                                                          |
| Myotis_brandtii_RPL17_10016236  | <i>RPL17</i>  | Ribosomal protein L17, component of cytosolic 80S ribosome and 60S large subunit                                                                                          |
| Myotis_brandtii_RPL18_10015319  | <i>RPL18</i>  | similar to C terminus of <i>S. cerevisiae</i> RPL18A (YOL120C) and RPL18B (YOL120C); intron and 5' exon upstream                                                          |
| Myotis_brandtii_Rpl19_10021565  | <i>RPL19</i>  | ribosomal protein L19                                                                                                                                                     |
| Myotis_brandtii_Rpl19_10021566  | <i>RPL19</i>  | ribosomal protein L19                                                                                                                                                     |
| Myotis_brandtii_RPL21_10025405  | <i>RPL21</i>  | similar to C terminus of <i>S. cerevisiae</i> RPL21A (YBR191W) and RPL21B (YPL079W) genes for cytosolic ribosomal protein large subunit; short 5' exon upstream of intron |
| Myotis_brandtii_Rpl26_10028664  | <i>RPL26</i>  | ribosomal protein L26                                                                                                                                                     |
| Myotis_brandtii_Rpl27_10034731  | <i>RPL27</i>  | ribosomal protein L27                                                                                                                                                     |
| Myotis_brandtii_Rpl27a_10020321 | <i>RPL27A</i> | ribosomal protein L27A                                                                                                                                                    |
| Myotis_brandtii_RPL29_10008202  | <i>RPL29</i>  | Rpl29p                                                                                                                                                                    |
| Myotis_brandtii_RPL29_10012324  | <i>RPL29</i>  | Rpl29p                                                                                                                                                                    |
| Myotis_brandtii_Rpl31_10034841  | <i>RPL31</i>  | ribosomal protein L31                                                                                                                                                     |
| Myotis_brandtii_Rpl32_10005908  | <i>RPL32</i>  | ribosomal protein L32                                                                                                                                                     |
| Myotis_brandtii_Rpl32_10015803  | <i>RPL32</i>  | ribosomal protein L32                                                                                                                                                     |
| Myotis_brandtii_Rpl32_10032721  | <i>RPL32</i>  | ribosomal protein L32                                                                                                                                                     |
| Myotis_brandtii_Rpl32_10034974  | <i>RPL32</i>  | ribosomal protein L32                                                                                                                                                     |
| Myotis_brandtii_Rpl36_10005219  | <i>RPL36</i>  | Rpl36 60S ribosomal protein L36, probable (IC)                                                                                                                            |
| Myotis_brandtii_RPL36_10011147  | <i>RPL36</i>  | ribosomal protein L36, component of cytosolic 80S ribosome and 60S large subunit                                                                                          |
| Myotis_brandtii_Rpl36a_10029682 | <i>RPL36A</i> | ribosomal protein L36A                                                                                                                                                    |
| Myotis_brandtii_RPL37A_10007828 | <i>RPL37A</i> | Rpl37ap                                                                                                                                                                   |
| Myotis_brandtii_RPL4_10018988   | <i>RPL4</i>   | ribosomal protein L4, component of cytosolic 80S ribosome and 60S large subunit                                                                                           |
| Myotis_brandtii_RPL4_10018989   | <i>RPL4</i>   | ribosomal protein L4, component of cytosolic 80S ribosome and 60S large subunit                                                                                           |
| Myotis_brandtii_RPL4_10018990   | <i>RPL4</i>   | ribosomal protein L4, component of cytosolic 80S ribosome and 60S large subunit                                                                                           |
| Myotis_brandtii_RPL4_10035501   | <i>RPL4</i>   | ribosomal protein L4, component of cytosolic 80S ribosome and 60S large subunit                                                                                           |
| Myotis_brandtii_RPL6_10033107   | <i>RPL6</i>   | Ribosomal protein L6, component of cytosolic 80S ribosome and 60S large subunit                                                                                           |

|                                   |                 |                                                                                 |
|-----------------------------------|-----------------|---------------------------------------------------------------------------------|
| Myotis_brandtii_RPL7_10026407     | <i>RPL7</i>     | Ribosomal protein L7, component of cytosolic 80S ribosome and 60S large subunit |
| Myotis_brandtii_RPLP1_10035388    | <i>RPLP1</i>    | ribosomal protein, large, P1                                                    |
| Myotis_brandtii_RPLP1_10035762    | <i>RPLP1</i>    | ribosomal protein, large, P1                                                    |
| Myotis_brandtii_RNF181_10031381   | <i>RNF181</i>   | ring finger protein 181                                                         |
| Myotis_brandtii_RLIM_10016583     | <i>RLIM</i>     | ring finger protein, LIM domain interacting                                     |
| Myotis_brandtii_HNRNPA1_10025610  | <i>HNRNPA1</i>  | heterogeneous nuclear ribonucleoprotein A1                                      |
| Myotis_brandtii_POLR2C_10024582   | <i>POLR2C</i>   | polymerase (RNA) II (DNA directed) polypeptide C, 33kDa                         |
| Myotis_brandtii_Rps11_10031571    | <i>RPS11</i>    | Rps11                                                                           |
| Myotis_brandtii_Rps15_10033481    | <i>RPS15</i>    | ribosomal protein S15                                                           |
| Myotis_brandtii_Rps16_10019181    | <i>RPS16</i>    | ribosomal protein S16                                                           |
| Myotis_brandtii_RPS2_10017782     | <i>RPS2</i>     | Rps2p                                                                           |
| Myotis_brandtii_rps2_10034595     | <i>RPS2</i>     | RPS2                                                                            |
| Myotis_brandtii_RPS2_10035519     | <i>RPS2</i>     | Rps2p                                                                           |
| Myotis_brandtii_rps24_10029631    | <i>RPS24</i>    | ribosomal protein S24                                                           |
| Myotis_brandtii_Rps26_10022142    | <i>RPS26</i>    | ribosomal protein S26                                                           |
| Myotis_brandtii_Rps26_10031098    | <i>RPS26</i>    | ribosomal protein S26                                                           |
| Myotis_brandtii_Rps6_10012767     | <i>RPS6</i>     | ribosomal protein S6                                                            |
| Myotis_brandtii_Rps6_10021894     | <i>RPS6</i>     | ribosomal protein S6                                                            |
| Myotis_brandtii_RPS6_10022417     | <i>RPS6</i>     | TIR-NBS-LRR class disease resistance protein                                    |
| Myotis_brandtii_Rps8_10015562     | <i>RPS8</i>     | Rps8                                                                            |
| Myotis_brandtii_RPSA_10028767     | <i>RPSA</i>     | ribosomal protein SA                                                            |
| Myotis_brandtii_MRPS33_10034391   | <i>MRPS33</i>   | mitochondrial ribosomal protein S33                                             |
| Myotis_brandtii_SLC25A39_10027264 | <i>SLC25A39</i> | solute carrier family 25, member 39                                             |
| Myotis_brandtii_Slc25a39_10027266 | <i>SLC25A39</i> | solute carrier family 25, member 39                                             |
| Myotis_brandtii_SALL4_10017833    | <i>SALL4</i>    | sal-like 4 (Drosophila)                                                         |
| Myotis_brandtii_SALL4_10017834    | <i>SALL4</i>    | sal-like 4 (Drosophila)                                                         |
| Myotis_brandtii_NA_10024307       | <i>NA</i>       | NA                                                                              |
| Myotis_brandtii_SF3B5_10011224    | <i>SF3B5</i>    | splicing factor 3b, subunit 5, 10kDa                                            |
| Myotis_brandtii_SIAH1_10026007    | <i>SIAH1</i>    | siah E3 ubiquitin protein ligase 1                                              |
| Myotis_brandtii_skp1_10027959     | <i>SKP1</i>     | S-phase kinase-associated protein 1                                             |
| Myotis_brandtii_SLIT1_10033398    | <i>SLIT1</i>    | slit homolog 1 (Drosophila)                                                     |
| Myotis_brandtii_Son_10029366      | <i>SON</i>      | Son DNA binding protein                                                         |
| Myotis_brandtii_Spata5_10005562   | <i>SPATA5</i>   | spermatogenesis associated 5                                                    |
| Myotis_brandtii_SRSF1_10020959    | <i>SRSF1</i>    | serine/arginine-rich splicing factor 1                                          |
| Myotis_brandtii_Srsf3_10012579    | <i>SRSF3</i>    | serine/arginine-rich splicing factor 3                                          |
| Myotis_brandtii_Ssr3_10029717     | <i>SSR3</i>     | signal sequence receptor, gamma                                                 |
| Myotis_brandtii_Suclg1_10027229   | <i>SUCLG1</i>   | succinate-CoA ligase, GDP-forming, alpha subunit                                |
| Myotis_brandtii_GTF2F1_10033850   | <i>GTF2F1</i>   | general transcription factor IIF, polypeptide 1, 74kDa                          |
| Myotis_brandtii_TAF12_10028254    | <i>TAF12</i>    | transcription initiation factor TFIID subunit D10                               |
| Myotis_brandtii_TBC1D25_10017075  | <i>TBC1D25</i>  | TBC1 domain family, member 25                                                   |
| Myotis_brandtii_TCNA_10031674     | <i>TCNA</i>     | NA                                                                              |
| Myotis_brandtii_Tead3_10027735    | <i>TEAD3</i>    | TEA domain family member 3                                                      |
| Myotis_brandtii_GTF2H1_10026470   | <i>GTF2H1</i>   | general transcription factor IIH, polypeptide 1, 62kDa                          |
| Myotis_brandtii_GTF2H1_10026471   | <i>GTF2H1</i>   | general transcription factor IIH, polypeptide 1, 62kDa                          |
| Myotis_brandtii_Tfpt_10021192     | <i>TFPT</i>     | TCF3 (E2A) fusion partner                                                       |
| Myotis_brandtii_TFPT_10021193     | <i>TFPT</i>     | TCF3 (E2A) fusion partner (in childhood Leukemia)                               |
| Myotis_brandtii_Timm22_10020667   | <i>TIMM22</i>   | translocase of inner mitochondrial membrane 22 homolog (yeast)                  |
| Myotis_brandtii_Tmem140_10034109  | <i>TMEM140</i>  | transmembrane protein 140                                                       |
| Myotis_brandtii_Trappc21_10022522 | <i>TRAPPC2L</i> | trafficking protein particle complex 2-like                                     |
| Myotis_brandtii_UBE2R2_10009073   | <i>UBE2R2</i>   | ubiquitin-conjugating enzyme E2R 2                                              |

|                                   |                 |                                                                             |
|-----------------------------------|-----------------|-----------------------------------------------------------------------------|
| Myotis_brandtii_UBE2V1_10033069   | <i>UBE2V1</i>   | ubiquitin-conjugating enzyme E2 variant 1                                   |
| Myotis_brandtii_FAU_10019804      | <i>FAU</i>      | Finkel-Biskis-Reilly murine sarcoma virus (FBR-MuSV) ubiquitously expressed |
| Myotis_brandtii_UBP1_10030291     | <i>UBP1</i>     | upstream binding protein 1 (LBP-1a)                                         |
| Myotis_brandtii_USF2_10034396     | <i>USF2</i>     | upstream transcription factor 2, c-fos interacting                          |
| Myotis_brandtii_UTP18_10017844    | <i>UTP18</i>    | UTP18, small subunit (SSU) processome component, homolog (yeast)            |
| Myotis_brandtii_UTP18_10017845    | <i>UTP18</i>    | UTP18, small subunit (SSU) processome component, homolog (yeast)            |
| Myotis_brandtii_ATP6V1E1_10020062 | <i>ATP6V1E1</i> | ATPase, H <sup>+</sup> transporting, lysosomal 31kDa, V1 subunit E1         |
| Myotis_brandtii_YBX1_10032836     | <i>YBX1</i>     | Y box binding protein 1                                                     |
| Myotis_brandtii_Zmat2_10017843    | <i>ZMAT2</i>    | zinc finger, matrin type 2                                                  |
| Myotis_brandtii_ZWINT_10018315    | <i>ZWINT</i>    | ZW10 interactor                                                             |

**Supplementary Table S10 | *Myotis brandtii* lost genes compared to human.**

| GeneID          | Gene Symbol          | Gene Name                                                                  |
|-----------------|----------------------|----------------------------------------------------------------------------|
| ENST00000416408 | <i>AC004258.1</i>    | NA                                                                         |
| ENST00000436967 | <i>AC008271.1</i>    | NA                                                                         |
| ENST00000535853 | <i>AC016586.1</i>    | NA                                                                         |
| ENST00000409070 | <i>AC016757.3</i>    | Uncharacterized protein                                                    |
| ENST00000452718 | <i>AC083862.1</i>    | Uncharacterized protein                                                    |
| ENST00000356686 | <i>AC092031.1</i>    | NA                                                                         |
| ENST00000418835 | <i>AC092687.4</i>    | Uncharacterized protein                                                    |
| ENST00000416839 | <i>AC096644.1</i>    | Uncharacterized protein                                                    |
| ENST00000409162 | <i>AC112721.1</i>    | Uncharacterized protein                                                    |
| ENST00000544589 | <i>AC132186.1</i>    | CDNA FLJ27243 fis, clone SYN08134                                          |
| ENST00000535173 | <i>AC135178.1</i>    | HCG1985372; Uncharacterized protein; cDNA FLJ37541 fis, clone BRCAN2026340 |
| ENST00000440990 | <i>AL033532.1</i>    | Uncharacterized protein                                                    |
| ENST00000370795 | <i>AL078633.1</i>    | NA                                                                         |
| ENST00000398726 | <i>AL162389.1</i>    | Uncharacterized protein                                                    |
| ENST00000373137 | <i>AL591845.1</i>    | NA                                                                         |
| ENST00000544076 | <i>AP000974.1</i>    | CDNA FLJ26432 fis, clone KDN01418; Uncharacterized protein                 |
| ENST00000398067 | <i>AP001024.1</i>    | Uncharacterized protein                                                    |
| ENST00000447610 | <i>AP001024.2</i>    | Uncharacterized protein                                                    |
| ENST00000369492 | <i>ATP1A1OS</i>      | ATP1A1 opposite strand                                                     |
| ENST00000239125 | <i>C10ORF95</i>      | chromosome 10 open reading frame 95                                        |
| ENST00000378416 | <i>C16ORF85</i>      | chromosome 16 open reading frame 85                                        |
| ENST00000382638 | <i>C18ORF62</i>      | chromosome 18 open reading frame 62                                        |
| ENST00000301246 | <i>C19ORF33</i>      | chromosome 19 open reading frame 33                                        |
| ENST00000420022 | <i>C19ORF76</i>      | chromosome 19 open reading frame 76                                        |
| ENST00000379205 | <i>C4ORF46</i>       | chromosome 4 open reading frame 46                                         |
| ENST00000503143 | <i>C5ORF20</i>       | chromosome 5 open reading frame 20                                         |
| ENST00000436592 | <i>C5ORF27</i>       | chromosome 5 open reading frame 27                                         |
| ENST00000509627 | <i>C5ORF49</i>       | chromosome 5 open reading frame 49                                         |
| ENST00000519561 | <i>C8ORF44</i>       | chromosome 8 open reading frame 44                                         |
| ENST00000457681 | <i>C9ORF147</i>      | chromosome 9 open reading frame 147                                        |
| ENST00000374213 | <i>CD52</i>          | CD52 molecule                                                              |
| ENST00000378779 | <i>CTD-2210P24.4</i> | Uncharacterized protein                                                    |
| ENST00000510604 | <i>CTD-2228K2.5</i>  | Uncharacterized protein                                                    |
| ENST00000357412 | <i>CXORF24</i>       | chromosome X open reading frame 24                                         |
| ENST00000322246 | <i>DEFB112</i>       | defensin, beta 112                                                         |
| ENST00000398948 | <i>DSCR4</i>         | Down syndrome critical region gene 4                                       |
| ENST00000357704 | <i>DSCR8</i>         | Down syndrome critical region gene 8                                       |
| ENST00000327532 | <i>DZIP1L</i>        | DAZ interacting protein 1-like                                             |
| ENST00000360827 | <i>FAM177B</i>       | family with sequence similarity 177, member B                              |
| ENST00000407599 | <i>GAGE10</i>        | G antigen 10                                                               |
| ENST00000361446 | <i>GAGE12B</i>       | G antigen 12B                                                              |
| ENST00000420398 | <i>GAGE12C</i>       | G antigen 12C                                                              |
| ENST00000405679 | <i>GAGE12D</i>       | G antigen 12D                                                              |
| ENST00000381698 | <i>GAGE12E</i>       | G antigen 12E                                                              |
| ENST00000440137 | <i>GAGE12F</i>       | G antigen 12F                                                              |
| ENST00000445148 | <i>GAGE12G</i>       | G antigen 12G                                                              |
| ENST00000381722 | <i>GAGE12H</i>       | G antigen 12H                                                              |
| ENST00000415752 | <i>GAGE12I</i>       | G antigen 12I                                                              |

|                 |                      |                                                                            |
|-----------------|----------------------|----------------------------------------------------------------------------|
| ENST00000442437 | <i>GAGE12J</i>       | G antigen 12J                                                              |
| ENST00000381751 | <i>GAGE13</i>        | G antigen 13                                                               |
| ENST00000381709 | <i>GAGE1</i>         | G antigen 1                                                                |
| ENST00000362097 | <i>GAGE2A</i>        | G antigen 2A                                                               |
| ENST00000381725 | <i>GAGE2B</i>        | G antigen 2B                                                               |
| ENST00000381708 | <i>GAGE2C</i>        | G antigen 2C                                                               |
| ENST00000404720 | <i>GAGE2D</i>        | G antigen 2D                                                               |
| ENST00000402590 | <i>GAGE2E</i>        | G antigen 2E                                                               |
| ENST00000381700 | <i>GAGE4</i>         | G antigen 4                                                                |
| ENST00000373005 | <i>GTSF1L</i>        | gametocyte specific factor 1-like                                          |
| ENST00000293330 | <i>HCRT</i>          | hypocretin (orexin) neuropeptide precursor                                 |
| ENST00000257572 | <i>HRK</i>           | harakiri, BCL2 interacting protein (contains only BH3 domain)              |
| ENST00000377035 | <i>IL31</i>          | interleukin 31                                                             |
| ENST00000409539 | <i>INMT</i>          | indolethylamine N-methyltransferase                                        |
| ENST00000535211 | <i>KTNI-AS1</i>      | KTNI antisense RNA 1 (non-protein coding)                                  |
| ENST00000460508 | <i>LBX2</i>          | ladybird homeobox 2                                                        |
| ENST00000538077 | <i>LINC00346</i>     | long intergenic non-protein coding RNA 346                                 |
| ENST00000374555 | <i>MDS2</i>          | myelodysplastic syndrome 2 translocation associated                        |
| ENST00000261507 | <i>MSMO1</i>         | methylsterol monooxygenase 1                                               |
| ENST00000536684 | <i>MTRNR2L8</i>      | MT-RNR2-like 8                                                             |
| ENST00000308946 | <i>MYEOV</i>         | myeloma overexpressed (in a subset of t(11;14) positive multiple myelomas) |
| ENST00000425699 | <i>NANOS1</i>        | nanos homolog 1 (Drosophila)                                               |
| ENST00000356906 | <i>NBR2</i>          | neighbor of BRCA1 gene 2 (non-protein coding)                              |
| ENST00000552815 | <i>ORPHAN</i>        | Uncharacterized protein                                                    |
| ENST00000376150 | <i>PAGE1</i>         | P antigen family, member 1 (prostate associated)                           |
| ENST00000218068 | <i>PAGE4</i>         | P antigen family, member 4 (prostate associated)                           |
| ENST00000418336 | <i>PKNOX1</i>        | PBX/knotted 1 homeobox 1                                                   |
| ENST00000301698 | <i>PRR25</i>         | proline rich 25                                                            |
| ENST00000342055 | <i>RHD</i>           | Rh blood group, D antigen                                                  |
| ENST00000447795 | <i>RP11-126K1.2</i>  | Novel protein; Uncharacterized protein                                     |
| ENST00000532511 | <i>RP11-17M16.1</i>  | Uncharacterized protein                                                    |
| ENST00000529278 | <i>RP11-315O6.2</i>  | HCG1815860; Uncharacterized protein                                        |
| ENST00000523692 | <i>RP11-325I22.2</i> | NA                                                                         |
| ENST00000439236 | <i>RP11-366L20.2</i> | Uncharacterized protein                                                    |
| ENST00000375670 | <i>RP11-410N8.4</i>  | NA                                                                         |
| ENST00000512516 | <i>RP11-487E13.1</i> | Uncharacterized protein                                                    |
| ENST00000551650 | <i>RP11-650K20.3</i> | Uncharacterized protein                                                    |
| ENST00000508020 | <i>RP11-701P16.2</i> | Uncharacterized protein                                                    |
| ENST00000354756 | <i>RP11-89K21.1</i>  | NA                                                                         |
| ENST00000311067 | <i>RP11-89N17.1</i>  | HCG1643653; Uncharacterized protein                                        |
| ENST00000415412 | <i>RP5-837J1.2</i>   | NA                                                                         |
| ENST00000343542 | <i>RXFP1</i>         | relaxin/insulin-like family peptide receptor 1                             |
| ENST00000269205 | <i>SLC25A52</i>      | solute carrier family 25, member 52                                        |
| ENST00000406890 | <i>STEAP1B</i>       | STEAP family member 1B                                                     |
| ENST00000303130 | <i>TMEM133</i>       | transmembrane protein 133                                                  |
| ENST00000296529 | <i>TMEM144</i>       | transmembrane protein 144                                                  |
| ENST00000434970 | <i>TRDD2</i>         | T cell receptor delta diversity 2                                          |
| ENST00000250066 | <i>USP6</i>          | ubiquitin specific peptidase 6 (Tre-2 oncogene)                            |
| ENST00000506413 | <i>WWC2-AS2</i>      | WWC2 antisense RNA 2 (non-protein coding)                                  |
| ENST00000255198 | <i>ZBED3</i>         | zinc finger, BED-type containing 3                                         |

**Supplementary Table S11 | Overview of species examined.** C = complete coverage. The UCSC genome name is shown in bold, while the full common name includes the text in brackets.

| Common name                                 | Binomial name                        | UCSC assembly | Coverage |
|---------------------------------------------|--------------------------------------|---------------|----------|
| <b>Brandt's bat</b>                         | <i>Myotis brandtii</i>               | -             | 78X      |
| <b>little brown bat</b>                     | <i>Myotis lucifugus</i>              | myoLuc2       | 6.6X     |
| <b>megabat</b> /fruit bat/flying fox        | <i>Pteropus vampyrus</i>             | pteVam1       | 2.9X     |
| <b>human</b>                                | <i>Homo sapiens</i>                  | hg19          | C        |
| (common) <b>chimpanzee</b>                  | <i>Pan troglodytes</i>               | panTro2       | 6.0X     |
| (Western lowland) <b>gorilla</b>            | <i>Gorilla gorilla gorilla</i>       | gorGor1       | 2.1X     |
| (Sumatran) <b>orangutan</b>                 | <i>Pongo pygmaeus abelii</i>         | ponAbe2       | 6X       |
| <b>rhesus</b> (monkey)                      | <i>Macaca mulatta</i>                | rheMac2       | 5.1X     |
| (hamadryas) <b>baboon</b>                   | <i>Papio hamadryas</i>               | papHam1       | 5.3X     |
| (common) <b>marmoset</b>                    | <i>Callithrix jacchus</i>            | calJac1       | 6X       |
| (Philippine) <b>tarsier</b>                 | <i>Tarsier syrichta</i>              | tarSyr1       | 2.1X     |
| (gray) <b>mouse lemur</b>                   | <i>Microcebus murinus</i>            | micMur1       | 1.9X     |
| <b>bushbaby</b> /small-eared greater galago | <i>Otolemur garnettii</i>            | otoGar1       | 1.9X     |
| (Northern) <b>tree shrew</b>                | <i>Tupaia belangeri</i>              | tupBel1       | 1.9X     |
| (house) <b>mouse</b>                        | <i>Mus musculus</i>                  | mm9           | C        |
| (brown) <b>rat</b>                          | <i>Rattus norvegicus</i>             | rn4           | 7.3X     |
| (Ord's) <b>kangaroo rat</b>                 | <i>Dipodomys ordii</i>               | dipOrd1       | 1.8X     |
| <b>guinea pig</b>                           | <i>Cavia porcellus</i>               | cavPor3       | 6.76X    |
| (thirteen-lined ground) <b>squirrel</b>     | <i>Spermophilus tridecemlineatus</i> | speTri1       | 1.9X     |
| (European) <b>rabbit</b>                    | <i>Oryctolagus cuniculus</i>         | oryCun2       | 7.5X     |
| (American) <b>pika</b>                      | <i>Ochotona princeps</i>             | ochPri2       | 1.9X     |
| <b>alpaca</b>                               | <i>Vicugna pacos</i>                 | vicPac1       | 2.9X     |
| (Atlantic bottlenose) <b>dolphin</b>        | <i>Tursiops truncatus</i>            | turTru1       | 2.8X     |
| <b>cow</b>                                  | <i>Bos taurus</i>                    | bosTau4       | 5.4X     |
| <b>horse</b>                                | <i>Equus caballus</i>                | equCab2       | 6.8X     |
| <b>cat</b>                                  | <i>Felis catus</i>                   | felCat3       | 1.9X     |
| <b>dog</b>                                  | <i>Canis lupus familiaris</i>        | canFam2       | 7.6X     |
| (European) <b>hedgehog</b>                  | <i>Erinaceus europaeus</i>           | eriEur1       | 1.9X     |
| (common) <b>shrew</b>                       | <i>Sorex araneus</i>                 | sorAra1       | 1.9X     |
| (African) <b>elephant</b>                   | <i>Loxodonta africana</i>            | loxAfr3       | 7X       |
| <b>rock hyrax</b>                           | <i>Procavia capensis</i>             | proCap1       | 2.4X     |
| (lesser hedgehog) <b>tenrec</b>             | <i>Echinops telfairi</i>             | echTel1       | 1.9X     |
| (nine-banded) <b>armadillo</b>              | <i>Dasyopus novemcinctus</i>         | dasNov2       | 2.3X     |
| (Hoffmann's two-toed) <b>sloth</b>          | <i>Choloepus hoffmanni</i>           | choHof1       | 2.2X     |
| (tamar) <b>wallaby</b>                      | <i>(Macropus eugenii)</i>            | macEug1       | 2X       |
| (gray short-tailed) <b>opossum</b>          | <i>Monodelphis domestica</i>         | monDom5       | 6.8X     |
| <b>platypus</b>                             | <i>Ornithorhynchus anatinus</i>      | ornAna1       | 6X       |
| <b>chicken</b>                              | <i>Gallus gallus</i>                 | galGal3       | 6.6X     |
| <b>zebra finch</b>                          | <i>Taeniopygia guttata</i>           | taeGut1       | 6X       |
| (green anole) <b>lizard</b>                 | <i>Anolis carolinensis</i>           | anoCar1       | 6.8X     |
| (Western clawed) <b>frog</b>                | <i>Xenopus tropicalis</i>            | xenTro2       | 7.65X    |
| <b>tetraodon</b> /green spotted puffer      | <i>Tetraodon nigroviridis</i>        | tetNig2       | 7.9X     |
| (tora) <b>fugu</b>                          | <i>Takifugu rubripes</i>             | fr2           | 8.5X     |
| (three-spined) <b>stickleback</b>           | <i>Gasterosteus aculeatus</i>        | gasAcu1       | 6X       |
| <b>medaka</b> /Japanese rice fish           | <i>Oryzias latipes</i>               | oryLat2       | 10.6X    |
| <b>zebrafish</b>                            | <i>Danio rerio</i>                   | danRer6       | 6.5X     |
| (sea) <b>lamprey</b>                        | <i>Petromyzon marinus</i>            | petMar1       | 5.9X     |

|                |                              |         |     |
|----------------|------------------------------|---------|-----|
| naked mole rat | <i>Heterocephalus glaber</i> | hetGla1 | 90X |
|----------------|------------------------------|---------|-----|



**Supplementary Table S12 | Positively selected genes in the *M. brandtii* genome.** The genes in bold were manually inspected. '% sites under selection' refers to sites in the Gblocks alignment under positive selection (detected by Bayes Empirical Bayes (BEB) with posterior probabilities greater than 95%.

| Symbol                | Name                                                                             | $\Omega$        | % sites tested under selection | P-value          | FDR corrected P-value |
|-----------------------|----------------------------------------------------------------------------------|-----------------|--------------------------------|------------------|-----------------------|
| <i>AANAT</i>          | aralkylamine N-acetyltransferase                                                 | 999             | 1.7%                           | 5.70E-05         | 0.010253919           |
| <i>ACOT11</i>         | acyl-CoA thioesterase 11                                                         | 32.89828        | 0.5%                           | 0.0004647        | 0.043873529           |
| <i>ADAM19</i>         | ADAM metallopeptidase domain 19                                                  | 9.73739         | 0.6%                           | 4.20E-05         | 0.008650868           |
| <i>ADAM32</i>         | ADAM metallopeptidase domain 32                                                  | 21.20338        | 1.6%                           | 0.00019226       | 0.023175913           |
| <i>AFM</i>            | Afamin                                                                           | 29.99272        | 0.5%                           | 7.76E-05         | 0.012939625           |
| <i>AIFM3</i>          | apoptosis-inducing factor, mitochondrion-associated, 3                           | 74.24212        | 2.5%                           | 7.50E-05         | 0.012813987           |
| <i>AKR1D1</i>         | aldo-keto reductase family 1, member D1 (delta 4-3-ketosteroid-5-beta-reductase) | 8.10238         | 1.0%                           | 0.00054663       | 0.048874514           |
| <i>ALS2CR11</i>       | amyotrophic lateral sclerosis 2 (juvenile) chromosome region, candidate 11       | 8.64673         | 0.2%                           | 4.84E-08         | 5.94E-05              |
| <i>ANO9</i>           | anoctamin 9                                                                      | 999             | 0.5%                           | 3.55E-06         | 0.001776832           |
| <i>ARMC9</i>          | armadillo repeat containing 9                                                    | 998.99916       | 0.3%                           | 2.08E-05         | 0.00616651            |
| <i>ATP2A3</i>         | ATPase, Ca++ transporting, ubiquitous                                            | 118.81451       | 0.1%                           | 0.00015224       | 0.020761538           |
| <i>C17orf78</i>       | chromosome 17 open reading frame 78                                              | 999             | 1.8%                           | 4.35E-07         | 0.000345165           |
| <i>C3</i>             | complement component 3                                                           | 4.34235         | 3.1%                           | 0.00045188       | 0.043379383           |
| <i>C3orf38</i>        | chromosome 3 open reading frame 38                                               | 20.1861         | 1.1%                           | 0.00012583       | 0.018465553           |
| <i>C4orf29</i>        | chromosome 4 open reading frame 29                                               | 67.68103        | 0.6%                           | 4.29E-05         | 0.008652126           |
| <b><i>C8A</i></b>     | <b>complement component 8, alpha polypeptide</b>                                 | <b>14.85375</b> | <b>0.6%</b>                    | <b>1.33E-05</b>  | <b>0.005003996</b>    |
| <b><i>CD200R1</i></b> | <b>CD200 receptor 1</b>                                                          | <b>6.23285</b>  | <b>1.3%</b>                    | <b>8.68E-16</b>  | <b>5.86E-12</b>       |
| <i>CD300LF</i>        | CD300 molecule-like family member f                                              | 46.49154        | 3.6%                           | 9.63E-07         | 0.000650262           |
| <i>CD46</i>           | CD46 molecule, complement regulatory protein                                     | 15.78262        | 0.8%                           | 6.09E-05         | 0.010818742           |
| <i>CD5</i>            | CD5 molecule                                                                     | 100.26543       | 0.6%                           | 0.00016994       | 0.022060125           |
| <i>CD55</i>           | CD55 molecule, decay accelerating factor for complement (Cromer blood group)     | 7.53893         | 3.1%                           | 0.00046374       | 0.043873529           |
| <i>CDC45</i>          | cell division cycle associated 5                                                 | 62.78854        | 0.8%                           | 2.34E-05         | 0.006330079           |
| <i>CDH19</i>          | cadherin 19, type 2                                                              | 2.72528         | 2.1%                           | 0.00048135       | 0.044511687           |
| <i>CEPT1</i>          | choline/ethanolamine phosphotransferase 1                                        | 882.17093       | 0.7%                           | 2.76E-05         | 0.006861945           |
| <i>CGNLI</i>          | cingulin-like 1                                                                  | 998.985         | 1.8%                           | 0.00013527       | 0.019428514           |
| <b><i>CIDEC</i></b>   | <b>cell death-inducing DFFA-like effector c</b>                                  | <b>999</b>      | <b>0.4%</b>                    | <b>0.0001562</b> | <b>0.020808747</b>    |
| <i>CNPY4</i>          | canopy 4 homolog (zebrafish)                                                     | 998.99983       | 0.9%                           | 2.72E-05         | 0.006861945           |
| <i>CPN2</i>           | carboxypeptidase N, polypeptide 2                                                | 29.29815        | 0.9%                           | 9.58E-06         | 0.003920772           |
| <i>CUL4B</i>          | cullin 4B                                                                        | 29.73298        | 0.4%                           | 4.23E-05         | 0.008650868           |
| <i>DDX10</i>          | DEAD (Asp-Glu-Ala-Asp) box polypeptide 10                                        | 75.82903        | 9.3%                           | 0.0003824        | 0.037411467           |
| <i>DHRS3</i>          | dehydrogenase/reductase (SDR family) member 3                                    | 999             | 1.9%                           | 0.00010761       | 0.016595611           |
| <i>DMBT1</i>          | deleted in malignant brain tumors 1                                              | 389.32792       | 1.1%                           | 7.13E-09         | 1.20E-05              |
| <i>DPP4</i>           | dipeptidyl-peptidase 4                                                           | 43.84608        | 0.3%                           | 0.0002997        | 0.030961606           |
| <i>ENG</i>            | Endoglin                                                                         | 998.99864       | 0.2%                           | 0.00010914       | 0.016595611           |
| <i>ENPP5</i>          | ectonucleotide pyrophosphatase/phosphodiesterase (putative) 5                    | 998.9989        | 0.3%                           | 0.00032098       | 0.032172383           |
| <i>EPX</i>            | eosinophil peroxidase                                                            | 58.04964        | 0.2%                           | 5.24E-05         | 0.010104148           |
| <i>EVI2B</i>          | ecotropic viral integration site 2B                                              | 15.05115        | 0.2%                           | 7.73E-05         | 0.012939625           |

|                 |                                                            |                  |             |                   |                    |
|-----------------|------------------------------------------------------------|------------------|-------------|-------------------|--------------------|
| <i>FAM82A2</i>  | family with sequence similarity 82, member A2              | 54.06927         | 0.3%        | 0.00047235        | 0.044286093        |
| <i>FER</i>      | fer (fps/fes related) tyrosine kinase                      | 16.77718         | 0.9%        | 0.00014239        | 0.020025077        |
| <i>FGB</i>      | <b>fibrinogen beta chain</b>                               | <b>12.7338</b>   | <b>0.4%</b> | <b>1.60E-05</b>   | <b>0.005408838</b> |
| <i>FOXH1</i>    | forkhead box H1                                            | 999              | 1.3%        | 0.0003217         | 0.032172383        |
| <i>FREMI</i>    | FRAS1 related extracellular matrix 1                       | 207.21303        | 0.2%        | 5.37E-05          | 0.010194532        |
| <i>FRK</i>      | fyn-related kinase                                         | 6.58452          | 1.3%        | 0.00014713        | 0.020478372        |
| <i>FSTL4</i>    | folliculin-like 4                                          | 621.50634        | 9.1%        | 0.00019092        | 0.023175913        |
| <i>FTSJ1</i>    | FtsJ RNA methyltransferase homolog 1 (E. coli)             | 998.99974        | 0.5%        | 0.0001413         | 0.020025077        |
| <i>GIMAP7</i>   | GTPase, IMAP family member 7                               | 31.11229         | 0.5%        | 3.16E-05          | 0.007198058        |
| <i>GLT25D1</i>  | glycosyltransferase 25 domain containing 1                 | 43.1004          | 0.8%        | 0.00028236        | 0.030497139        |
| <i>GPR125</i>   | G protein-coupled receptor 125                             | 998.99919        | 0.0%        | 3.75E-06          | 0.001807205        |
| <i>GPR146</i>   | G protein-coupled receptor 146                             | 999              | 0.4%        | 0.00027345        | 0.030145647        |
| <i>GTPBP3</i>   | GTP binding protein 3 (mitochondrial)                      | 83.18907         | 0.5%        | 0.00016234        | 0.021279149        |
| <i>HEMGN</i>    | Hemogen                                                    | 18.70414         | 0.3%        | 0.0002682         | 0.029925357        |
| <i>HIST1H1T</i> | histone cluster 1, H1t                                     | 757.18013        | 3.1%        | 9.09E-07          | 0.000646229        |
| <i>HNRPLL</i>   | heterogeneous nuclear ribonucleoprotein L-like             | 56.32263         | 0.4%        | 2.26E-05          | 0.00630662         |
| <i>HPS6</i>     | Hermansky-Pudlak syndrome 6                                | 999              | 0.2%        | 0.00017911        | 0.022390408        |
| <i>HSDL2</i>    | hydroxysteroid dehydrogenase like 2                        | 83.61153         | 0.2%        | 0.00011526        | 0.017201164        |
| <i>IFLTD1</i>   | intermediate filament tail domain containing 1             | 19.85907         | 0.4%        | 1.46E-05          | 0.005145266        |
| <i>IQCF5</i>    | <b>IQ motif containing F5</b>                              | <b>10.33215</b>  | <b>3.9%</b> | <b>2.85E-05</b>   | <b>0.006877795</b> |
| <i>IRF9</i>     | interferon regulatory factor 9                             | 14.19644         | 1.3%        | 0.00012763        | 0.018528308        |
| <i>IZUMO1</i>   | izumo sperm-egg fusion 1                                   | 8.39178          | 0.4%        | 0.00022051        | 0.025229708        |
| <i>KALRN</i>    | kalirin, RhoGEF kinase                                     | 65.76299         | 0.5%        | 0.00015202        | 0.020761538        |
| <i>KCNK4</i>    | <b>potassium channel, subfamily K, member 4</b>            | <b>998.99924</b> | <b>0.8%</b> | <b>0.00015721</b> | <b>0.020808747</b> |
| <i>KIAA1551</i> | KIAA1551                                                   | 130.67397        | 0.2%        | 9.81E-08          | 0.000110397        |
| <i>KNG1</i>     | <b>kininogen 1</b>                                         | <b>7.93538</b>   | <b>1.9%</b> | <b>7.35E-06</b>   | <b>0.003201827</b> |
| <i>LGALS3</i>   | lectin, galactoside-binding, soluble, 3                    | 998.93159        | 0.6%        | 0.00015436        | 0.020808747        |
| <i>MAP2K6</i>   | <b>mitogen-activated protein kinase kinase 6</b>           | <b>999</b>       | <b>0.9%</b> | <b>2.80E-05</b>   | <b>0.006861945</b> |
| <i>MAP3K15</i>  | mitogen-activated protein kinase kinase kinase 15          | 41.92301         | 18.2%       | 3.06E-05          | 0.007198058        |
| <i>MEIS3</i>    | Meis homeobox 3                                            | 71.83448         | 0.7%        | 0.00010752        | 0.016595611        |
| <i>MYH1</i>     | myosin, heavy chain 1, skeletal muscle, adult              | 3.3455           | 4.5%        | 0.00021686        | 0.025024161        |
| <i>MYH15</i>    | myosin, heavy chain 15                                     | 51.92737         | 0.2%        | 3.28E-05          | 0.007258669        |
| <i>MYOT</i>     | Myotilin                                                   | 409.11566        | 0.3%        | 0.00054497        | 0.048874514        |
| <i>NBN</i>      | Nibrin                                                     | 52.78951         | 0.3%        | 0.0001006         | 0.016169055        |
| <i>NDUFB1</i>   | NADH dehydrogenase (ubiquinone) 1 beta subcomplex, 1, 7kDa | 138.29874        | 1.5%        | 0.00036896        | 0.036568986        |
| <i>NEBL</i>     | <b>Nebulette</b>                                           | <b>173.55538</b> | <b>0.2%</b> | <b>2.78E-05</b>   | <b>0.006861945</b> |
| <i>NFYA</i>     | nuclear transcription factor Y, alpha                      | 123.986          | 0.6%        | 4.14E-05          | 0.008650868        |
| <i>NID2</i>     | nidogen 2 (osteonidogen)                                   | 3.94666          | 0.2%        | 0.00018386        | 0.022604356        |
| <i>NMBR</i>     | neuromedin B receptor                                      | 998.99999        | 0.5%        | 0.00037108        | 0.036568986        |
| <i>NOX3</i>     | <b>NADPH oxidase 3</b>                                     | <b>998.99859</b> | <b>0.2%</b> | <b>2.29E-05</b>   | <b>0.00630662</b>  |
| <i>NPNT</i>     | Nephronectin                                               | 229.05817        | 0.6%        | 1.70E-06          | 0.001040682        |
| <i>NTNG2</i>    | netrin G2                                                  | 999              | 3.4%        | 7.92E-05          | 0.013043777        |
| <i>P2RY11</i>   | purinergic receptor P2Y, G-protein coupled, 11             | 67.09373         | 0.6%        | 2.73E-05          | 0.006861945        |
| <i>P2RY12</i>   | purinergic receptor P2Y, G-protein coupled, 12             | 998.9993         | 0.3%        | 0.00019962        | 0.023640962        |

|                      |                                                                                                            |                 |             |                 |                    |
|----------------------|------------------------------------------------------------------------------------------------------------|-----------------|-------------|-----------------|--------------------|
| <i>PCDHGB7</i>       | protocadherin gamma subfamily B, 7                                                                         | 112.82458       | 0.3%        | 3.18E-06        | 0.001650861        |
| <i>PDE9A</i>         | phosphodiesterase 9A                                                                                       | 999             | 0.2%        | 0.000531116     | 0.048187697        |
| <i>PGC</i>           | progastricin (pepsinogen C)                                                                                | 289.02029       | 1.8%        | 1.08E-07        | 0.000111799        |
| <i>PHACTR4</i>       | phosphatase and actin regulator 4                                                                          | 177.71686       | 0.2%        | 1.81E-05        | 0.005812502        |
| <i>PITPNB</i>        | phosphatidylinositol transfer protein, beta                                                                | 999             | 0.8%        | 3.83E-05        | 0.008348409        |
| <i>PLD4</i>          | phospholipase D family, member 4                                                                           | 54.57308        | 1.0%        | 0.00017816      | 0.022390408        |
| <i>PLSCR1</i>        | phospholipid scramblase 1                                                                                  | 69.34939        | 0.5%        | 0.00020615      | 0.023993372        |
| <i>POLRMT</i>        | polymerase (RNA) mitochondrial (DNA directed)                                                              | 26.38593        | 1.6%        | 5.52E-05        | 0.010194532        |
| <i>PPP1R12C</i>      | protein phosphatase 1, regulatory subunit 12C                                                              | 24.51994        | 0.4%        | 4.46E-05        | 0.008859237        |
| <i>PRKRIR</i>        | protein-kinase, interferon-inducible double stranded RNA dependent inhibitor, repressor of (P58 repressor) | 28.225          | 1.7%        | 0.00027932      | 0.030412091        |
| <i>PRRG1</i>         | proline rich Gla (G-carboxyglutamic acid) 1                                                                | 147.53862       | 1.1%        | 1.24E-05        | 0.004767396        |
| <i>PRSS53</i>        | protease, serine, 53                                                                                       | 236.31104       | 5.1%        | 9.76E-22        | 1.32E-17           |
| <i>PWPI</i>          | PWP1 homolog (S. cerevisiae)                                                                               | 678.2464        | 0.7%        | 0.00030893      | 0.031597454        |
| <i>RAD51AP2</i>      | RAD51 associated protein 2                                                                                 | 14.54511        | 0.1%        | 4.24E-10        | 1.15E-06           |
| <i>RAPGEF3</i>       | Rap guanine nucleotide exchange factor (GEF) 3                                                             | 999             | 1.6%        | 3.20E-05        | 0.007198058        |
| <i>RHNO1</i>         | RAD9-HUS1-RAD1 interacting nuclear orphan 1                                                                | 47.65033        | 1.3%        | 1.41E-06        | 0.000904503        |
| <i>RPL23</i>         | ribosomal protein L23                                                                                      | 142.1821        | 2.8%        | 3.61E-07        | 0.000304464        |
| <b><i>RSPO1</i></b>  | <b>R-spondin 1</b>                                                                                         | <b>999</b>      | <b>1.1%</b> | <b>2.05E-05</b> | <b>0.00616651</b>  |
| <i>RTL1</i>          | retrotransposon-like 1                                                                                     | 2.65774         | 1.0%        | 0.00010189      | 0.016183728        |
| <i>SCEL</i>          | Sciellin                                                                                                   | 834.95257       | 0.5%        | 2.59E-07        | 0.000233252        |
| <i>SCGB1C1</i>       | secretoglobin, family 1C, member 1                                                                         | 22.72521        | 3.8%        | 0.00029517      | 0.030961606        |
| <i>SCN5A</i>         | sodium channel, voltage-gated, type V, alpha subunit                                                       | 63.05693        | 0.4%        | 0.00029688      | 0.030961606        |
| <i>SGSM3</i>         | small G protein signaling modulator 3                                                                      | 999             | 0.5%        | 0.00045304      | 0.043379383        |
| <i>SIGLEC10</i>      | sapiens sialic acid binding Ig-like lectin 10                                                              | 22.82778        | 0.2%        | 0.00019692      | 0.023527583        |
| <i>SIGLEC5</i>       | sialic acid binding Ig-like lectin 5                                                                       | 975.4514        | 0.3%        | 0.0000669       | 0.011731317        |
| <i>SLC13A3</i>       | solute carrier family 13 (sodium-dependent dicarboxylate transporter), member 3                            | 6.25625         | 1.8%        | 0.0000138       | 0.005036603        |
| <i>SLC16A1</i>       | solute carrier family 16, member 1 (monocarboxylic acid transporter 1)                                     | 14.75259        | 0.3%        | 0.00048978      | 0.044983128        |
| <i>SLC22A14</i>      | solute carrier family 22, member 14                                                                        | 194.45004       | 0.6%        | 0.00011594      | 0.017201164        |
| <i>SLC22A6</i>       | solute carrier family 22 (organic anion transporter), member 6                                             | 508.68971       | 3.3%        | 0.00053181      | 0.048187697        |
| <i>SLC39A2</i>       | solute carrier family 39 (zinc transporter), member 2                                                      | 7.0811          | 0.3%        | 7.44E-05        | 0.012813987        |
| <i>SLC44A2</i>       | solute carrier family 44, member 2                                                                         | 250.76395       | 0.3%        | 0.00027464      | 0.030145647        |
| <i>SLC9C2</i>        | solute carrier family 9, member C2 (putative)                                                              | 31.37037        | 0.4%        | 3.16E-05        | 0.007198058        |
| <i>SLFN11</i>        | schlafen family member 11                                                                                  | 12.36061        | 0.2%        | 0.00032043      | 0.032172383        |
| <b><i>SMAD4</i></b>  | <b>SMAD family member 4</b>                                                                                | <b>16.0078</b>  | <b>1.4%</b> | <b>4.96E-06</b> | <b>0.002231445</b> |
| <b><i>SPAMI</i></b>  | <b>sperm adhesion molecule 1 (PH-20 hyaluronidase, zona pellucida binding)</b>                             | <b>19.19882</b> | <b>2.4%</b> | <b>5.78E-10</b> | <b>1.30E-06</b>    |
| <i>SPEG</i>          | SPEG complex locus                                                                                         | 17.14402        | 0.0%        | 0.00024291      | 0.027329399        |
| <i>SPRYD7</i>        | SPRY domain containing 7                                                                                   | 170.1284        | 1.6%        | 4.41E-06        | 0.00205299         |
| <i>SPTBN4</i>        | spectrin, beta, non-erythrocytic 4                                                                         | 999             | 0.1%        | 2.14E-05        | 0.00616651         |
| <b><i>STRADA</i></b> | <b>STE20-related kinase adaptor alpha</b>                                                                  | <b>999</b>      | <b>0.5%</b> | <b>2.42E-06</b> | <b>0.001306681</b> |
| <i>SUMO1</i>         | SMT3 suppressor of mif two 3 homolog 1 (S. cerevisiae)                                                     | 998.99994       | 2.6%        | 1.00E-04        | 0.016169055        |
| <i>TCEA2</i>         | transcription elongation factor A (SII), 2                                                                 | 999             | 3.8%        | 2.10E-07        | 0.000202563        |
| <b><i>TCOF1</i></b>  | <b>Treacher Collins-Franceschetti syndrome 1</b>                                                           | <b>10.74103</b> | <b>0.4%</b> | <b>5.03E-05</b> | <b>0.009834207</b> |
| <i>TLR9</i>          | toll-like receptor 9                                                                                       | 15.49447        | 0.1%        | 0.00056325      | 0.049702211        |
| <i>TMSF1</i>         | transmembrane 4 L six family member 1                                                                      | 66.95365        | 2.1%        | 1.71E-05        | 0.005645394        |

|                  |                                                                    |           |      |            |             |
|------------------|--------------------------------------------------------------------|-----------|------|------------|-------------|
| <i>TMPRSS11F</i> | transmembrane protease, serine 11F                                 | 946.23245 | 1.5% | 3.64E-10   | 1.15E-06    |
| <i>TNXB</i>      | tenascin XB                                                        | 22.93863  | 1.3% | 2.28E-08   | 3.07E-05    |
| <i>TOX2</i>      | TOX high mobility group box family member 2                        | 998.99999 | 0.6% | 5.58E-05   | 0.010194532 |
| <i>TPM2</i>      | tropomyosin 2 (beta)                                               | 71.24693  | 0.7% | 0.00029993 | 0.030961606 |
| <i>TRMT61A</i>   | tRNA methyltransferase 61 homolog A (S. cerevisiae)                | 703.13541 | 1.3% | 0.00017311 | 0.022060125 |
| <i>TRPV5</i>     | transient receptor potential cation channel, subfamily V, member 5 | 999       | 0.2% | 0.00040994 | 0.039817266 |
| <i>UBE2W</i>     | ubiquitin-conjugating enzyme E2W (putative)                        | 999       | 0.9% | 2.15E-05   | 0.00616651  |

**Supplementary Table S13 | Significant GO categories of *M. brandtii* positively selected genes.** Benjamini-Hochberg adjusted p-value < 0.05. BP = biological process; CC = cellular compartment.

| GO categories | Description                                                           | Taxonomy | Number of Genes (all) | Number of Genes (in list) | P-value (hypergeometric) | Corrected P-value (Benjamini-Hochberg) |
|---------------|-----------------------------------------------------------------------|----------|-----------------------|---------------------------|--------------------------|----------------------------------------|
| GO:0006956    | complement activation                                                 | BP       | 32                    | 4                         | 0.0004                   | 0.0469                                 |
| GO:0006959    | humoral immune response                                               | BP       | 62                    | 5                         | 0.0006                   | 0.0469                                 |
| GO:0002541    | activation of plasma proteins involved in acute inflammatory response | BP       | 35                    | 4                         | 0.0005                   | 0.0469                                 |
| GO:0009566    | Fertilization                                                         | BP       | 50                    | 5                         | 0.0002                   | 0.0469                                 |
| GO:0006958    | complement activation, classical pathway                              | BP       | 25                    | 4                         | 0.0001                   | 0.0469                                 |
| GO:0002455    | humoral immune response mediated by circulating immunoglobulin        | BP       | 30                    | 4                         | 0.0003                   | 0.0469                                 |
| GO:0005576    | extracellular region                                                  | CC       | 1182                  | 5                         | 0.0003                   | 0.0146                                 |
| GO:0032444    | activin responsive factor complex                                     | CC       | 3                     | 2                         | 0.0003                   | 0.0146                                 |
| GO:0015629    | actin cytoskeleton                                                    | CC       | 202                   | 8                         | 0.0011                   | 0.0267                                 |
| GO:0005886    | plasma membrane                                                       | CC       | 2441                  | 40                        | 0.0009                   | 0.0267                                 |
| GO:0016459    | myosin complex                                                        | CC       | 53                    | 4                         | 0.0021                   | 0.0404                                 |
| GO:0031226    | intrinsic to plasma membrane                                          | CC       | 919                   | 19                        | 0.0025                   | 0.0404                                 |
| GO:0044459    | plasma membrane part                                                  | CC       | 1468                  | 26                        | 0.0035                   | 0.0485                                 |

**Supplementary Table S14 | Proteins that uniquely changed amino acids in *Myotis*.** AA changes correspond to residue locations in the translated human RefSeq mRNA entry (typically the longest RefSeq entry of each gene). *M. lucifugus* proteins correspond to ENSEMBL IDs. Known and putative functions are listed. All proteins were manually verified.

| Gene name                                                     | Symbol         | <i>M.brandtii</i> protein | <i>M.lucifugus</i> protein | human RefSeq | AA change(s)        | Function(s)                                                                                                                                                                  |
|---------------------------------------------------------------|----------------|---------------------------|----------------------------|--------------|---------------------|------------------------------------------------------------------------------------------------------------------------------------------------------------------------------|
| adenomatous polyposis coli                                    | <i>APC</i>     | 10033156                  | ENSMLUG00000014785         | NM_001127510 | D2684N<br>RH2721C   | tumor suppressor                                                                                                                                                             |
| cyclic nucleotide gated channel beta 3                        | <i>CNGB3</i>   | -                         | ENSMLUG00000000019         | NM_019098    | Y359C               | channel function in cone photoreceptors                                                                                                                                      |
| DEAD (Asp-Glu-Ala-Asp) box helicase 1                         | <i>DDX1</i>    | 10020169                  | ENSMLUG00000003027         | NM_004939    | K502R<br>Q713H      | RNA helicase. Template-guided repair of transcriptionally active regions of the genome                                                                                       |
| DENN/MADD domain containing 1B                                | <i>DENND1B</i> | 10008239                  | ENSMLUG00000002301         | NM_144977    | S340C               | activates Rab GTPases. Immune function                                                                                                                                       |
| Dystonin                                                      | <i>DST</i>     | 10026669                  | ENSMLUG00000005610         | NM_015548    | T210K/R<br>L/M2806R | cytoskeleton organisation                                                                                                                                                    |
| enhanced RNAi (RNA interference) family member 3              | <i>ERI3</i>    | 10008306                  | ENSMLUG00000003870         | NM_024066    | H161Q               | regulation of RNA interference (RNAi)                                                                                                                                        |
| follicle stimulating hormone, beta polypeptide                | <i>FSHB</i>    | 10028764                  | ENSMLUG00000015565         | NM_000510    | ST107R              | development of ovarian follicle and spermatogenesis in the reproductive organs. Residue implicated in binding with FSHR                                                      |
| helicase (DNA) B                                              | <i>HELB</i>    | 10022899                  | ENSMLUG00000017176         | NM_033647    | C280F               | facilitates cellular recovery from replication stress                                                                                                                        |
| mediator complex subunit 13-like                              | <i>MED13L</i>  | 10031057                  | ENSMLUG00000000740         | NM_015335    | R2775W              | Mediator complex subunit, coregulator or RNA PolII transcription                                                                                                             |
| mediator complex subunit 23                                   | <i>MED23</i>   | 10035672                  | ENSMLUG00000016810         | NM_004830    | D775N<br>P787del    | Mediator complex subunit, coregulator or RNA PolII transcription                                                                                                             |
| non-SMC condensin II complex, subunit D3                      | <i>NCAPD3</i>  | 10003684                  | ENSMLUG00000009710         | NM_015261    | HR1020Q             | mitotic chromosome assembly                                                                                                                                                  |
| SET and MYND domain containing 4                              | <i>SMYD4</i>   | 10015717                  | ENSMLUG00000006108         | NM_052928    | FL360C              | development of muscle                                                                                                                                                        |
| slingshot homolog 2                                           | <i>SSH2</i>    | 10015941                  | ENSMLUG00000003080         | NM_033389    | SG1398H             | regulates actin filament dynamics                                                                                                                                            |
| uridine monophosphate synthetase                              | <i>UMPS</i>    | 10032668                  | ENSG00000114491            | NM_000373    | P360S               | catalyses the final two steps of the de novo pyrimidine biosynthetic pathway                                                                                                 |
| bombesin-like receptor 3                                      | <i>BRS3</i>    | 10013462                  | ENSG00000102239            | NM_001727    | T272I               | GPCR with physiological effects including regulation of reproduction and insulin secretion                                                                                   |
| vacuolar protein sorting 4 homolog B ( <i>S. cerevisiae</i> ) | <i>VPS4B</i>   | 10020306                  | ENSG00000119541            | NM_004869    | V353I               | mediates endosomal membrane protein sorting. Host factor for viral budding: hijacked by viruses such as HIV                                                                  |
| putative homeodomain transcription factor 1                   | <i>PHTF1</i>   | 10029989                  | ENSG00000116793            | NM_006608    | N694T<br>Y732F      | differentiation of male germ cell and spermatogenesis                                                                                                                        |
| protease, serine, 23                                          | <i>PRSS23</i>  | 10014366                  | ENSG00000150687            | NM_007173    | P287L               | protease involved in ovulation                                                                                                                                               |
| histidyl-tRNA synthetase 2, mitochondrial (putative)          | <i>HARS2</i>   | 10027842                  | ENSG00000112855            | NM_012208    | L140M               | mitochondrial translation. Mutations of adjacent residue 141, implicated in binding with histidyl-adenosine monophosphate (HAM), causes ovarian dysfunction and hearing loss |
| DEAD (Asp-Glu-Ala-Asp) box polypeptide 4                      | <i>DDX4</i>    | 10010767                  | ENSG00000152670            | NM_024415    | T543A               | RNA helicase. Expressed in reproductive tissues of both sexes. May function in sperm motility                                                                                |
| chromosome 6 open reading frame 62                            | <i>C6orf62</i> | 10006523                  | ENSG00000112308            | NM_030939    | M227L               | unknown                                                                                                                                                                      |

**Supplementary Table S15 | Data statistics of *M. brandtii* transcriptomes.**

H2 refers to bats hibernating for 2 months, H6 to bats hibernating for 6 months, and A to summer active bats. Replicate samples represent different animals.

| Sample          | TotalReads(M) | MappedReads(M) | Reads(%) | TotalBases(G) | MappedBases(G) | Bases(%) |
|-----------------|---------------|----------------|----------|---------------|----------------|----------|
| H6 liver 1 RNA  | 47.18         | 31.43          | 66.61    | 4.25          | 2.83           | 66.61    |
| H6 liver 2 RNA  | 37.51         | 26.63          | 70.99    | 3.38          | 2.40           | 70.99    |
| H2 liver 1 RNA  | 65.08         | 44.05          | 67.69    | 5.86          | 3.96           | 67.69    |
| H2 kidney 1 RNA | 68.62         | 41.06          | 59.84    | 6.18          | 3.70           | 59.84    |
| H2 brain 1 RNA  | 64.92         | 45.45          | 70.01    | 5.84          | 4.09           | 70.01    |
| H2 liver 2 RNA  | 65.04         | 42.61          | 65.52    | 5.85          | 3.84           | 65.52    |
| H2 kidney 2 RNA | 64.52         | 39.35          | 60.99    | 5.81          | 3.54           | 60.99    |
| H2 brain 2 RNA  | 67.79         | 49.27          | 72.68    | 6.10          | 4.43           | 72.68    |
| A liver 1 RNA   | 58.90         | 37.85          | 64.26    | 5.30          | 3.41           | 64.26    |
| A kidney 1 RNA  | 73.70         | 43.20          | 58.62    | 6.63          | 3.89           | 58.62    |
| A liver 2 RNA   | 73.54         | 44.49          | 60.50    | 6.62          | 4.00           | 60.50    |
| A kidney 2 RNA  | 77.01         | 44.71          | 58.06    | 6.93          | 4.02           | 58.06    |
| A brain 1 RNA   | 74.25         | 55.73          | 75.05    | 6.68          | 5.02           | 75.05    |
| H6 kidney 2 RNA | 69.46         | 41.36          | 59.54    | 6.25          | 3.72           | 59.54    |
| H6 kidney 1 RNA | 63.86         | 41.56          | 65.08    | 5.75          | 3.74           | 65.08    |



**Supplementary Table S16 | Insulin/IGF1 gene expression of *M. brandtii* and *GHR*<sup>-/-</sup> mice.** The log<sub>2</sub> fold change in gene expression in the liver of the *M. brandtii* (Brandt's bat; both active and hibernating) versus mice was calculated, with values of at least ±1.5 highlighted in red (increase) and green (decrease). Adjusted p-value < 0.05 (by Benjamini-Hochberg procedure) were highlighted in yellow. Values were calculated using R-package edgeR. *GHR*<sup>-/-</sup> mice: the previously reported direction of changes (up- or down-regulation with respect to wild-type mice); Log<sub>2</sub>(FC): normalized log<sub>2</sub> fold change.

| Mouse Gene Symbol                 | Description                                                         | GHR <sup>-/-</sup> vs WT mice | Bat (active) vs Mouse |                  | Bat (hibernating) vs Mouse |                  |
|-----------------------------------|---------------------------------------------------------------------|-------------------------------|-----------------------|------------------|----------------------------|------------------|
|                                   |                                                                     |                               | Log <sub>2</sub> (FC) | Adjusted p-value | Log <sub>2</sub> (FC)      | Adjusted p-value |
| <i>Akt1</i>                       | thymoma viral proto-oncogene 1                                      | Up                            | -2.4                  | 1.18E-07         | -2.6                       | 1.10E-10         |
| <i>Akt2</i>                       | thymoma viral proto-oncogene 2                                      | Up                            | 2.1                   | 2.38E-09         | 2.2                        | 1.28E-09         |
| <i>Foxo1</i>                      | forkhead box O1                                                     | Up                            | 2.5                   | 3.35E-10         | 2.1                        | 5.63E-06         |
| <i>G6pc</i> ( <i>G6Pase</i> )     | glucose-6-phosphatase, catalytic                                    | Up                            | 3.7                   | 3.98E-13         | 2.7                        | 6.73E-07         |
| <i>Insr</i>                       | insulin receptor                                                    | Up                            | 1.6                   | 2.55E-07         | 1.0                        | 0.001632         |
| <i>Irs1</i>                       | insulin receptor substrate 1                                        | Up                            | 1.5                   | 0.020234         | 1.1                        | 0.095843         |
| <i>Irs2</i>                       | insulin receptor substrate 2                                        | Up                            | 2.7                   | 6.26E-08         | 2.4                        | 0.000124         |
| <i>Pck2</i> ( <i>PEPCK</i> )      | phosphoenolpyruvate carboxykinase 2 (mitochondrial)                 | Up                            | 7.2                   | 6.26E-64         | 7.0                        | 7.46E-47         |
| <i>Ppargc1a</i> ( <i>PGC-1a</i> ) | peroxisome proliferative activated receptor, gamma, 1 alpha         | Up                            | 2.7                   | 7.71E-06         | 1.5                        | 0.110424         |
| <i>Prkaa1</i> ( <i>AMPK</i> )     | protein kinase, AMP-activated, alpha 1 catalytic subunit            | Up                            | 1.0                   | 0.174343         | 0.8                        | 0.279847         |
| <i>Slc2a2</i> ( <i>GLUT2</i> )    | solute carrier family 2 (facilitated glucose transporter), member 2 | Up                            | -0.6                  | 0.14345          | -1.9                       | 0.000143         |

**Supplementary Table S17 | Comparison of wildtype mouse and long-lived mice and bat.** The log2 fold change in gene expression in the liver tissues of the Brandt's bat *M. brandtii* (both active and hibernating) versus wild type (WT) mice was calculated, with values of at least  $\pm 1.5$  highlighted in red (increase) and green (decrease). Adjusted p-value  $< 0.05$  (by Benjamini-Hochberg procedure) were highlighted in yellow. Values were calculated using the R-package edgeR. Long-lived Mouse vs WT mice: the previously reported direction of change in long-lived mice (up- or down-regulation) with respect to wild-type mice; Log2(FC): normalized log 2 fold change.

| Mouse Gene Symbol | Description                                                     | Long-lived Mouse vs WT Mouse | Bat (active) vs Mouse |                  | Bat (hibernating) vs Mouse |                  |
|-------------------|-----------------------------------------------------------------|------------------------------|-----------------------|------------------|----------------------------|------------------|
|                   |                                                                 |                              | Log2 (FC)             | Adjusted p-value | Log2 (FC)                  | Adjusted p-value |
| <i>Alas2</i>      | aminolevulinic acid synthase 2                                  | Down                         | -8.7                  | 1.74E-07         | -8.1                       | 5.88E-13         |
| <i>Apoa4</i>      | apolipoprotein A-IV                                             | Down                         | 0.3                   | 1                | 1.2                        | 0.283652         |
| <i>Cmas</i>       | cytidine monophospho-N-acetylneuraminic acid synthetase         | Down                         | -8.3                  | 6.69E-14         | -8.8                       | 3.11E-21         |
| <i>Dclre1a</i>    | DNA cross-link repair 1A, PSO2 homolog                          | Up                           | 1.5                   | 0.018106         | 1.3                        | 0.058231         |
| <i>Dpp7</i>       | dipeptidylpeptidase 7                                           | Down                         | 2.8                   | 2.12E-18         | 2.6                        | 9.15E-14         |
| <i>Egfr</i>       | epidermal growth factor receptor                                | Down                         | -2.4                  | 9.50E-05         | -2.7                       | 1.41E-07         |
| <i>Fabp2</i>      | fatty acid binding protein 2                                    | Down                         | -8.8                  | 2.26E-22         | -9.3                       | 8.27E-34         |
| <i>Ero11b</i>     | ERO1-like beta                                                  | Down                         | 2.9                   | 1.99E-12         | 3.5                        | 1.28E-11         |
| <i>Hsd17b12</i>   | hydroxysteroid (17-beta) dehydrogenase 12                       | Down                         | -0.9                  | 0.003325         | -1.9                       | 1.47E-09         |
| <i>Hsd17b2</i>    | hydroxysteroid (17-beta) dehydrogenase 2                        | Down                         | -8.4                  | 8.11E-38         | -6.3                       | 1.17E-46         |
| <i>Igf1</i>       | insulin-like growth factor 1                                    | Down                         | 0.1                   | 1                | 0.4                        | 0.478455         |
| <i>Igfals</i>     | insulin-like growth factor binding protein, acid labile subunit | Down                         | -6.2                  | 4.52E-16         | -5.9                       | 8.97E-25         |
| <i>Lifr</i>       | leukemia inhibitory factor receptor                             | Down                         | -2.6                  | 4.37E-11         | -3.0                       | 2.97E-18         |
| <i>Serpina12</i>  | serine peptidase inhibitor, clade A member 12                   | Down                         | -1.9                  | 0.007352         | -3.0                       | 1.62E-05         |
| <i>Tjpi2</i>      | tissue factor pathway inhibitor 2                               | Down                         | -1.9                  | 0.001159         | -2.1                       | 4.82E-05         |

## **SUPPLEMENTARY NOTE 1: SPECIES RANGE MAP**

The species range map was obtained from the IUCN Red List of Threatened Species<sup>61</sup>.

## **SUPPLEMENTARY NOTE 2: VISION**

The retinas of mammals contain rod and cone photoreceptors for night vision and for daylight vision, respectively<sup>62</sup>. It is less established what kind of color vision adaptations individual species have accumulated. Bats are among the most numerous group of mammals (with regard to species) and have adapted to occupy a wide range of habitats since their common ancestor. The current evidence suggests that the echolocating bats, including *Myotis*, possess dichromatic color vision, dim-light sensitive rods and UV-sensitive cones<sup>63-66</sup>.

### *RHO* – rhodopsin

The ability to see under dim-light conditions has been largely attributed to the rod visual pigment rhodopsin, whose gene (*RHO*) is highly conserved in vertebrates<sup>67</sup>. A recent study reported that several bat branches share amino acid changes that map to the transmembrane domains and the intradiscal space of rhodopsin<sup>66</sup>. Our analysis of *M. brandtii* and *M. lucifugus* sequences confirms all findings in the previous study, except that residue 286 previously found to be unique to the *Myotis* and Hipposideridae families, is not changed in *M. brandtii* and *M. lucifugus* (Supplementary Fig. S12).

### OPN1SW – Short-wavelength sensitive opsin/S opsin

UV is more abundant at dawn and dusk and the mouse is able to tune its short wavelength sensitive opsin/S opsin to UV by altering a set of amino acids in the protein<sup>68,69</sup>. It has recently been shown that the megabat *Pteropus dasymallus* and several echolocating species harbor the same amino acids at these sites as the mouse. In contrast, loss of the S opsin gene (*OPN1SW*) has been associated with the development of high-duty cycle echolocation in bats, while low-duty echolocating bat species, such as *Myotis*, retain the gene<sup>65</sup>. High-duty cycle echolocation is considered an energy expensive, more advanced adaptation of low-duty echolocation that allowed bats to hunt more efficiently in dense forests and other cluttered habitats<sup>70</sup>. We found that the echolocating *M. brandtii* and *M. lucifugus* bat harbor the same S opsin-tuning residues as the non-echolocating megabat *Pteropus vampyrus* and mouse (Fig. 3). This suggests that *M. brandtii* has UV vision.

### **SUPPLEMENTARY NOTE 3: Comparison with insulin/IGF1 signaling gene expression in the *GHR*<sup>-/-</sup> mouse**

Several studies have reported the changes in mRNA and protein levels in the liver of *GHR*<sup>-/-</sup> mice as compared to wild-type controls<sup>44,71-73</sup>. Out of 13 genes previously reported to be differentially expressed in the liver of *GHR*<sup>-/-</sup> mice, we analyzed the genes that had unique one-to-one orthologs in *M. brandtii*. We observed up-regulation of genes including *AKT2*, *FOXO1*, G6Pase, insulin receptor substrate 2, *PEPCK* and *PGC-1 $\alpha$*  in the Brandt's bat compared to mouse (Supplementary Table S17), which was largely in-line with the effect of *GHR* knockout in mice.

#### **SUPPLEMENTARY NOTE 4: PANCREAS HISTOLOGY**

The pancreas was obtained from a bat that had hibernated for six months. The  $\alpha$ -cell/ $\beta$ -cell ratio is known to be unaltered in hibernating bats<sup>74,75</sup>. Diminished size of pancreatic islets of Langerhans in *M. brandtii* is shown in Supplementary Fig. S16. *M. brandtii* has tiny islets and the average number of cells of each islet is  $5.65 \pm 5$  with median value of 3.5 (n=40).

## **SUPPLEMENTARY NOTE 5: Comparison of differences in gene expression of the Brandt's bat, wild type mice and long-lived mice**

Long-lived strains of dwarf mice are typified by impaired signaling of the GH/IGF1 axis. These changes can occur at many steps along the signaling pathway, from the inhibition of anterior pituitary development, to the impaired sensitivity to growth hormone releasing hormone, and to the disruption of the growth hormone receptor. Compared with wild-type mice, these dwarf mice live longer, are less susceptible to age-related declines in bodily functions, and have lower rates of cancer. Profiling of gene expression in the liver tissues of long-lived dwarf mice suggested a repertoire of genes that were differentially expressed in the dwarf mice compared with wild-type mice<sup>46</sup>. Many of these genes were also differentially expressed in mice undergoing caloric restriction, suggesting there might be a common mechanism underlying the observed extension in lifespan.

Gene expression in *M. brandtii* liver showed a similar pattern to that in long-lived mice. Out of the 43 genes previously reported to be differentially expressed in long-lived mice<sup>46</sup>, we identified 15 genes that had unique one-to-one orthologs in *M. brandtii*. We compared the expression levels of these genes in the livers of *M. brandtii* and mice and found that 11 of the 15 genes followed the same directions of change as reported in long-lived mice (Supplementary Table S18).



## **SUPPLEMENTARY METHODS**

### **Genome sequencing and assembly**

#### **Genome sequencing**

To sequence the genome of *M. brandtii*, we applied a whole genome shotgun strategy and next-generation sequencing technologies using Illumina HiSeq 2000. In order to reduce the risk of non-randomness, we constructed 12 paired-end libraries by sequencing 12 lanes with insert sizes of about 170 base pairs (bp), 500 bp, 800 bp, 2 kbp, 5 kbp, 10 kbp, and 20 kbp. In total, we generated around 258 Gb of sequence, and 156 Gb (78 x coverage) was retained for assembly after filtering out low-quality and duplicated reads.

#### **Estimation of genome size using k-mer**

A k-mer refers to an artificial sequence division of K nucleotides. A raw sequence read with L bp contains (L-K+1) k-mers if the length of each k-mer is K bp. The frequency of each k-mer can be calculated from the genome sequence reads. Typically, k-mer frequencies plotted against the sequence depth gradient follow a Poisson distribution in any given dataset, whereas sequencing errors may lead to a higher representation of low frequencies. The genome size, G, can be calculated from the formula  $G = K\_num / K\_depth$ , where the K\_num is the total number of k-mers, and K\_depth denotes the frequency occurring more frequently than the other frequencies.

In this work, K was 17, K\_num was 83,436,283,306 and K\_depth was 44. We, therefore, estimated the *M. brandtii* genome size to be 1.9 Gb.

### **Nuclear genome assembly**

The genome was *de novo* assembled by SOAPdenovo<sup>56</sup> (<http://soap.genomics.org.cn>).

First, low-quality reads and those with potential sequencing errors were removed or corrected using the k-mer frequency. After these quality control and filtering steps, a total of 156 Gb (or 78 x) of data were retained for assembly. We assembled the genome using a previously described procedure<sup>76</sup>. About 101 Gb (or 50 x) of data were used to build contigs, while all high-quality data were used to build scaffolds.

Some intra-scaffold gaps were filled by local assembly using the reads in a read-pair, where one end was uniquely aligned to a contig while the other end was located within the gap. The final total contig size and N50 were 2.05 Gbp and 21 Kbp, respectively. The total scaffold size and N50 were 2.18 Gb and 3.1 Mbp, respectively.

To assess assembly quality, high quality short insert size reads that satisfied our filtering criteria were aligned onto the assembly using BWA<sup>77</sup> with parameters of -I. A total of 72 G (or 36 x) of high quality short insert size reads were used of which 96.28% reads could be mapped, and they covered 98.97% of the assembly, excluding gaps. Moreover, 91.64% of the assembly could be covered by more than 10 reads, and about 94.39% of all mapped reads were properly paired with the reasonable insert size

associated with the library built, suggesting a high quality assembly of high completeness and high accuracy.

### **Mitochondrial genome assembly**

The mitochondrial genome was assembled using SOAPdenovo<sup>56</sup> with default settings, and verified by multiple alignment with 14 bat mitochondrial genomes available at NCBI (*Artibeus jamaicensis*, *Pteropus dasymallus*, *Pteropus scapulatus*, *Chalinolobus tuberculatus*, *Pipistrellus abramus*, *Rhinolophus pumilus*, *Rhinolophus monoceros*, *Mystacina tuberculata*, *Rousettus aegyptiacus*, *Rhinolophus formosae*, *Artibeus lituratus*, *Plecotus rafinesquii*, *Lasiurus borealis*, *Myotis formosus*). The size of the Brandt's bat mitochondrial genome is 16,868 nucleotides, which is consistent with the data for other species.

### **Cysteine-content of mitochondrial protein-coding genes**

The data for Figure 4c and Supplementary Fig. S18 were extracted from the AnAge database (<http://genomics.senescence.info>, October 2012) and analyzed using a custom Perl script. A total of 1308 mammalian species were used in the analysis of body mass and longevity correlation, for which the data were known.

In addition to *M. brandtii*, the following 95 species were used for the analysis of cysteine content of mitochondrial protein-coding genes: *Balaenoptera physalus*, *Balaenoptera musculus*, *Homo sapiens*, *Megaptera novaeangliae*, *Elephas maximus*,

*Loxodonta africana, Eschrichtius robustus, Physeter catodon, Balaenoptera borealis, Berardius bairdii, Dugong dugon, Equus caballus, Pan troglodytes, Pongo pygmaeus, Hippopotamus amphibius, Gorilla gorilla, Balaenoptera acutorostrata, Ceratotherium simum, Pan paniscus, Tachyglossus aculeatus, Ursus arctos, Rhinoceros unicornis, Equus asinus, Halichoerus grypus, Cebus albifrons, Balaena mysticetus, Hylobates lar, Monodon monoceros, Odobenus rosmarus, Phoca vitulina, Ursus maritimus, Hyperoodon ampullatus, Papio hamadryas, Macaca mulatta, Tapirus terrestris, Felis catus, Ursus americanus, Cercopithecus aethiops, Zaglossus bruijnii, Bos taurus, Canis familiaris, Eumetopias jubatus, Inia geoffrensis, Choloepus didactylus, Platanista minor, Lemur catta, Nycticebus coucang, Vombatus ursinus, Bos grunniens, Trachypithecus obscurus, Colobus guereza, Ovis aries, Orycteropus afer, Macaca sylvanus, Capra hircus, Sus scrofa, Macropus robustus, Acinonyx jubatus, Muntiacus muntjak, Oryctolagus cuniculus, Kogia breviceps, Ornithorhynchus anatinus, Pontoporia blainvillei, Cavia porcellus, Dasyopus novemcinctus, Trichosurus vulpecula, Erinaceus europaeus, Procavia capensis, Echinops telfairi, Phocoena phocoena, Lepus europaeus, Sciurus vulgaris, Artibeus jamaicensis, Tupaia belangeri, Tamandua tetradactyla, Herpestes javanicus, Pseudocheirus peregrinus, Tarsius bancanus, Didelphis virginiana, Hemiechinus auritus, Macrotis lagotis, Ochotona princeps, Monodelphis domestica, Mus musculus, Ochotona collaris, Echinorex gymnura, Metachirus nudicaudatus, Rattus norvegicus, Talpa europaea, Thryonomys swinderianus, Crocidura russula, Isoodon macrourus, Perameles gunnii, Tarsipes rostratus, and Notoryctes typhlops.*

## Genome features

### Heterozygosity analysis

We aligned all high quality short insert size reads to the assembly using BWA<sup>77</sup> with parameters `-I`. Since the alignment results were stored in BAM/SAM format, SAMtools, which is based on the Bayesian model, was selected for variation analysis<sup>60</sup>. After sorting alignments by leftmost coordinates and removing potential PCR duplicates, we used SAMtools mpileup to call SNPs and short InDels. We rejected SNPs and InDels within reads with depth either much lower or much higher than expected, since large copy number variation might lead to miscalling of SNPs. The sequencing depth ranged from 4 to 100, and the upper limit was about triple the sequencing depth. The SNP-miscalling caused by alignment around short InDels and low-quality sequences were removed. We applied samtools.pl varFilter as the filter tool, which can be found in the SAMtools package, with parameters `-Q 20 -q 20 -d 4 -D 100 -S 20 -i 20 -N 5 -l 5 -W 5 -N 1`.

### Repeat annotation

We employed RepeatMasker<sup>78</sup> to identify and classify transposable elements (TEs) by aligning the *M. brandtii* genome sequences against a library of known repeats, Repbase (<http://www.girinst.org/rebase/>), with default parameters. To better compare the *M. brandtii* genome with those of other mammals, we used the same pipeline and

parameters to re-run the repeat annotations on the human, macaque, mouse, rat and dog genomes.

### **Gene annotation and evaluation of gene quality**

To predict genes encoded by the *M. brandtii* genome, we used both homology-based and *de novo* methods. For the homology-based prediction, human, mouse, dog, cow and horse proteins were downloaded from Ensembl (release 64) and mapped onto the genome using BLAT<sup>79</sup>. Homologous genome sequences were then aligned against the matching proteins using GeneWise<sup>80</sup> to define gene models. For *de novo* prediction, Augustus<sup>81</sup>, Genescan<sup>82</sup> and SNAP<sup>83</sup> were employed to predict coding genes, using appropriate parameters. RNA-seq data were mapped to genome using TopHat<sup>58</sup>, and transcriptome-based gene structures were obtained by cufflinks (<http://cufflinks.cbc.umd.edu>). Finally, homology-based, *de novo* derived gene sets and transcript gene sets were merged to form a comprehensive and non-redundant reference gene set using GLEAN (<http://sourceforge.net/projects/glean-gene/>), removing all genes that only had weak *de novo* support. We obtained a reference *M. brandtii* gene set containing 22,256 genes. Of these, 12,986 genes (58.35%) had three types of evidences and 20,910 genes (93.95%) had at least two types of evidence. Gene structures generated by GLEAN that differed from those generated by orthology analysis were subject to manual inspection and correction; a total 2,051 genes were refined.

### **Functional annotation of *M. brandtii* genes**

Gene functions were assigned according to the best match of the alignments using BLASTp against SWISS-PROT databases<sup>84</sup>. Gene Ontology IDs for each gene were obtained from the corresponding InterPro entry<sup>85,86</sup>. All genes were aligned against KEGG proteins, and the pathway in which the gene might be involved was derived from the matching genes in KEGG<sup>87</sup>.

### **Orthology relationship of *M. brandtii* and related mammals**

To determine orthology relationships between *M. brandtii* and other mammalian proteins, nucleotide and protein data for six mammals (human/*Homo sapiens*, mouse/*Mus musculus*, rat/*Rattus norvegicus*, cow/*Bos taurus*, dog/*Canis lupus familiaris*, and horse/*Equus caballus*) were downloaded from the Ensembl database (release 64). For genes with alternative splicing variants, the longest transcripts were selected to represent the genes. We then subjected all proteins to BLASTp analysis with the similarity cutoff of  $e=1e-5$ . With the *M. brandtii* protein set used as a reference, we found the best hit for each *M. brandtii* protein in other species, with the criteria that more than 30% of the aligned sequence showed an identity above 30%. Reciprocal best-match pairs were defined as orthologs.

## Gene evolution

### Gene family cluster

A gene family is a group of similar genes descended from a single gene in the last common ancestor of the targeted species. In this study, we used TreeFam (<http://www.treefam.org>)<sup>88</sup> to define gene families among 9 mammalian genomes (human, rhesus macaque, mouse, rat, cow, dog, cat, horse and *M. brandtii*). We employed the same pipeline and parameters as in our previously published studies<sup>7,76</sup> and obtained 11,527 gene families and 2,654 single-copy orthologs.

### Phylogenetic analysis

We constructed a phylogenetic tree of *M. brandtii* and the 8 other mammalian genomes (human, rhesus macaque, mouse, rat, cow, dog, cat and horse). A total of 2,654 single-copy gene families obtained as described above were used to reconstruct the phylogenetic tree. Coding sequences (CDS) from each single-copy family were aligned by MUSCLE<sup>89</sup> with the guidance of aligned protein sequences and concatenated to one super-gene for each species. Then, PhyML<sup>90</sup> was applied for these sequence sets to build a phylogenetic tree under GTR+gamma. We employed 1,000 rapid bootstrap replicated to assess the branch reliability (Supplementary Fig. S5). We also used codon 1,2 and 1+2 sequences extracted from the CDS alignment and used as input for building trees, along with protein sequences, and all results



indicated that *M. brandtii* and horse cluster together with high bootstrap. To estimate the divergence time, 4-fold degenerate sites were extracted from each single copy gene family and concatenated to one supergene for one species. We used PAML's MCMCtree<sup>91,92</sup> to determine split times with approximate likelihood calculation.

### **Gene family expansion and contraction**

Gene family expansion analysis was performed by using CAFE 2.1<sup>93</sup>. A random birth and death model was proposed to study gene gain and loss in gene families across a user-specified phylogenetic tree. A global parameter  $\lambda$ , which described both the gene birth ( $\lambda$ ) and death ( $\mu = -\lambda$ ) rates across all branches of the tree for all gene families, was estimated using maximum likelihood. Then, a conditional p-value was calculated for each gene family, and families with conditional p-values less than the threshold (0.05) were considered to have an accelerated rate of expansion and contraction. Our analysis revealed that a total of 67 gene families underwent expansion and 44 gene families underwent contraction in the *M. brandtii* lineage.

### ***M. brandtii* gained and lost genes**

To determine the orthologous relationship between *M. brandtii* and human proteins, sequences of the human protein dataset were downloaded from Ensembl (release 64). The longest transcript was chosen to represent each gene with alternative splicing

variants. We then subjected human and *M. brandtii* proteins to BLASTp analysis with the similarity cutoff threshold of  $e\text{-value}=1e^{-5}$ . With the human protein set as a reference, we found the best hit for each protein of *M. brandtii*, with the criteria that more than 30% of the aligned sequence showed an identity above 30%. Reciprocal best-match pairs were defined as orthologs. Then, gene order information was used to filter out false positive orthologs caused by draft genome assembly and annotation. Orthologs not in gene synteny blocks were removed from further analysis. For example, in the case of 3 continuous genes in the human genome A, B and C, even if all three orthologs could be identified in both humans and *M. brandtii* based on the cutoff threshold described above, but the B gene in the *M. brandtii* genome was not located between A and C genes, it was removed filtered out, as it could be located in another scaffold or another place within the same scaffold. Using this method, we identified gene synteny relationships for human and *M. brandtii* lineages.

Orthology information was obtained as described above. Since it showed synteny information at the protein level, it could be used to analyze gene-gain and -loss between human and *M. brandtii* lineages. In the protein synteny blocks, if a human protein had no *M. brandtii* ortholog, and excluding false positive predictions that could be caused by annotation or genome assembly (gap > 5%), this protein could be defined as either being lost in the *M. brandtii* lineage or gained in the human lineage. Using *M. brandtii* as a reference to generate the orthology relationship, we applied this procedure to identify the genes gained in the *M. brandtii* lineage compared to the

human lineage.

### ***M. brandtii* pseudogenes**

To detect homozygous pseudogenes in the *M. brandtii* genome *in silico*, we first aligned all human genes (protein sequences downloaded from Ensembl (release 64) onto the *M. brandtii* genome using BLASTp with parameters (-F F -e 1e-5). Solar<sup>94</sup> was used to conjoin the fragmental alignments for each gene. Best hit regions of each gene with 5 kb flanking sequence were cut down and re-aligned with their corresponding human orthologous protein sequences using GeneWise with parameters (-genesf -tfor -quiet), which helped define the detailed exon-intron structure of each gene. Genes with frameshifts and premature stop codons as reported by GeneWise were considered candidate pseudogenes. We further carried out a series of filtering processes: (i) To avoid the reported frameshifts and premature stop codons which were due to flaws in the GeneWise algorithm, we also aligned all human proteins to their corresponding loci in the human genome using GeneWise as a control, and genes with frameshifts and premature stop codons in the human-to-human alignment reported by GeneWise were filtered out; (ii) Using the results of the human-to-human alignment from GeneWise, candidate pseudogenes with obvious splicing errors near their frameshifts and premature stop codons were filtered out; (iii) Candidate pseudogenes with a low number of reads covering their frameshift and premature stop codon sites were considered assembly errors. In addition, cases with a considerable number of reads resulting from different genotypes at these sites were treated as

heterozygous. The cases of assembly error and heterozygosis were filtered out. In total, we identified 194 pseudogenes in the *M. brandtii* genome. By comparison with all alternative splice forms in humans, we found that 153 pseudogenes with the pseudo-mutations could be compensated by alternative splicing.

### **Identification of proteins with unique amino acid changes**

In addition to the Brandt's bat (*M. brandtii*), the little brown bat (*M. lucifugus*)<sup>95</sup> and the naked mole rat (*Heterocephalus glaber*)<sup>7</sup>, the following organisms obtained via the UCSC multiway track<sup>96</sup> were examined (the full common name includes the text in brackets): the megabat/fruit bat/flying fox *Pteropus vampyrus*, human (*Homo sapiens*), (common) chimpanzee (*Pan troglodytes*), (Sumatran) orangutan (*Pongo pygmaeus abelii*), rhesus monkey (*Macaca mulatta*), (hamadryas) baboon (*Papio hamadryas*), (Western lowland) gorilla (*Gorilla gorilla gorilla*), (common) marmoset (*Callithrix jacchus*), (Philippine) tarsier (*Tarsier syrichta*), (gray) mouse lemur (*Microcebus murinus*), bushbaby/small-eared greater galago (*Otolemur garnettii*), (Northern) tree shrew (*Tupaia belangeri*), (house) mouse (*Mus musculus*), (brown) rat (*Rattus norvegicus*), (Ord's) kangaroo rat (*Dipodomys ordii*), guinea pig (*Cavia porcellus*), (thirteen-lined ground) squirrel (*Spermophilus tridecemlineatus*), (European) rabbit (*Oryctolagus cuniculus*), (American) pika (*Ochotona princeps*), alpaca (*Vicugna pacos*), cow (*Bos taurus*), (Atlantic bottlenose) dolphin (*Tursiops truncatus*), horse (*Equus caballus*), cat (*Felis catus*), dog (*Canis lupus familiaris*), (European) hedgehog (*Erinaceus europaeus*), (common) shrew (*Sorex araneus*), rock

hyrax (*Procapra capensis*), (African) elephant (*Loxodonta africana*), (Hoffmann's two-toed) sloth (*Choloepus hoffmanni*), (lesser hedgehog) tenrec (*Echinops telfairi*), (nine-banded) armadillo (*Dasypus novemcinctus*), (tammar) wallaby (*Macropus eugenii*), (gray short-tailed) opossum (*Monodelphis domestica*), platypus (*Ornithorhynchus anatinus*), (green anole) lizard (*Anolis carolinensis*), chicken (*Gallus gallus*), zebra finch (*Taeniopygia guttata*), and (Western clawed) frog (*Xenopus tropicalis*). We acknowledge the contribution of numerous research centers in generating genome sequences for these organisms. Of particular relevance to our current work are the genomes of bats *M. lucifugus* and *P. vampyrus* generated by the Broad Institute and Baylor College of Medicine, respectively<sup>81</sup>. To convert predicted *Myotis* sequences into human RefSeq IDs, which are employed in the UCSC multiway alignments, NCBI tBLASTn in v2.2.26+ of the BLAST+ suite<sup>97</sup> (protein sequences queried against a translated human RefSeq nucleotide database) with an e-value cut-off set at 10e-5 was employed. The best match, with at least 50% overall amino acid identity (along the entire sequence) and spanning  $\geq 75\%$  of the length of the query sequence, was used to rename the sequences. *Myotis* proteins were aligned to their orthologs using Clustal W v2.1<sup>98</sup>. In-house Perl scripts were used to parse the Clustal output and identify unique amino acids.

Because of extensive exon shuffling and gene duplications in teleost fish genomes<sup>99-101</sup>, proteins that changed uniquely in *Myotis* compared to other tetrapods were independently aligned to their candidate fish medaka/Japanese rice fish (*Oryzias*

*latipes*), (three-spined) stickleback (*Gasterosteus aculeatus*), (tora)fugu (*Takifugu rubripes*), tetraodon/green spotted puffer (*Tetraodon nigroviridis*), and zebrafish (*Danio rerio*), as well as sea lamprey (*Petromyzon marinus*) orthologs.

The false positive rate of the detection of unique amino acids was estimated as follows. The estimated error rate for SOAPdenovo assembly was assumed to be 1 nucleotide per 81,025 base pairs<sup>102</sup>. Since only coding regions were used for amino acid conservation analysis, and total predicted size of coding sequences (CDS) of the Brandt's bat is approximately 33 Mb, then 418 nucleotides could be considered as candidates for false positives. Other factors (such as potential BLAST misalignment) are of minor importance, as parameters used in analysis were quite strict (i.e., e-value 1e-5). The procedure utilized in unique amino acid detection calls for a particular amino acid to be conserved among the tested vertebrate genomes, but differ in genome-in-question (e.g., bats in the genus *Myotis*, or *Myotis* and the Atlantic bottlenose dolphin). On a test dataset, 3,287 amino acids were conserved among 36 genomes, out of 1,018,988 tested cases; therefore, only 0.32% of all sequences fit our search criteria. Taken together, with 418 candidates, one would expect a false positive rate of 1.33 per analysis.

### **Positively selected genes**

1:1 orthologous coding sequence (mRNA) alignments using the UCSC Table Browser

data retrieval tool<sup>103</sup> were used to query UCSC multiway alignments<sup>96</sup> of megabat (*Pteropus vampyrus*), dog (*Canis lupus familiaris*), horse (*Equus caballus*), cow (*Bos Taurus*), the Atlantic bottlenose dolphin (*Tursiops truncatus*), and human (*Homo sapiens*). BLAST and custom Perl scripts were used to convert *M. brandtii* FASTA headers to matching human RefSeq identifiers compatible with the UCSC multiway alignment data set. The phylogenetic relationships between the 7 tested taxa were obtained from<sup>95</sup>. High-quality alignments were obtained from PRANK v.111130 (settings: -shortnames +F -termgap -codon -f=fasta) alignments using Gblocks v0.91b (settings: -t=c -e=.fa -d=y -b5=N -b0=4). Consistent with previous studies<sup>104-106</sup>, we employed PRANK (codon)<sup>107</sup> and Gblocks<sup>108,109</sup> to minimise the impact of multiple sequence alignment errors and divergent regions. The guide tree was estimated by the PRANK program since this method has been shown to be the most accurate for downstream PAML branch-site analysis of sequences of insertions and deletions<sup>104</sup>. For manipulations of sequences, we employed in-house Perl scripts and public BioPerl modules<sup>110</sup>.

Because manual inspection of positive selection data is currently recommended in the literature<sup>105,106</sup>, we manually examined the alignments of a subset of PAML results significant at a 1% false discovery rate. Large, divergent protein families, such as collagens, zinc finger proteins and olfactory receptors were omitted from the analysis. Results were discarded if the candidate PSG harbored coiled-coil domains as predicted by the program COILS<sup>111</sup>.

We analysed the list of genes under positive selection for GO term enrichment over the background using the WebGestalt online analysis tool<sup>112</sup>. Analysis was performed on the human orthologs of the bat gene lists. P-values were computed with the hypergeometric test and multiple test correction performed by the Benjamini-Hochberg method, using a significance cut-off of  $P < 0.05$  after multiple test correction.

PRANK, Gblocks and CodeML computations were run on the Orchestra supercomputing cluster supported by the Harvard Medical School Research Information Technology Group.

### **Analysis of individual genes**

The recently released genome sequence of the bat *Eptesicus fuscus* (the big brown bat, GenBank accession code GCA\_000308155), as well as transcriptome data from the big brown bat (liver), the Mexican free-tailed bat (*Tadarida brasiliensis*) (liver) and the Jamaican fruit bat *Artibeus jamaicensis* (liver, kidney, lung, primary kidney cells) (NCBI SRA accession code SRR539297)<sup>9</sup>, which are all bats in the Yangochiroptera suborder of echolocating bats (the second and most numerous suborder of bats), were used to manually validate the results pertaining to specific genes if sequence data could be obtained. We acknowledge the efforts of numerous research centers in



generating genome and transcriptome sequences for these organisms.

### **Comparison of gene expression of *M. brandtii*, *GHR*<sup>-/-</sup> mice and other long-lived mice to that of wild type mice**

We compared the RNA-seq data in liver tissues of *M. brandtii* with previously reported RNA-seq data in liver tissues of wild-type mice<sup>113,114</sup> (NCBI Short Read Archive SRP007412 and SRA001030). RPKM values were calculated for all genes that had unique one-to-one orthologs between bat and mouse (gene homology based on Ensembl Release 69) and normalized log<sub>2</sub> fold changes were computed using the R package edgeR<sup>115</sup>. We also examined the list of genes previously reported as differentially expressed in *GHR*<sup>-/-</sup> mice and long-lived dwarf mice. As the previously reported changes were qualitative<sup>44,46,71-73</sup>, in our case we considered only log<sub>2</sub> fold changes of at least  $\pm 1.5$  and determined whether they agreed with previously reported directions of change.

## SUPPLEMENTARY REFERENCES

61. Hutson, A. M. *et al.* *Myotis brandtii*. In *IUCN Red List of Threatened Species*, Version 2012.1. <http://www.iucnredlist.org>. Downloaded on 27 September 2012. (2008).
62. Jacobs, G. H. Evolution of colour vision in mammals. *Philos. Trans. R Soc. Lond. B Biol. Sci.* **364**, 2957-67 (2009).
63. Muller, B. *et al.* Bat eyes have ultraviolet-sensitive cone photoreceptors. *PLoS ONE* **4**, e6390 (2009).
64. Wang, D. *et al.* Molecular evolution of bat color vision genes. *Mol. Biol. Evol.* **21**, 295-302 (2004).
65. Zhao, H. *et al.* The evolution of color vision in nocturnal mammals. *Proc. Natl Acad. Sci. USA* **106**, 8980-5 (2009).
66. Shen, Y. Y., Liu, J., Irwin, D. M. & Zhang, Y. P. Parallel and convergent evolution of the dim-light vision gene RH1 in bats (Order: Chiroptera). *PLoS ONE* **5**, e8838 (2010).
67. Palczewski, K. Chemistry and biology of vision. *J. Biol. Chem.* **287**, 1612-9 (2012).
68. Shi, Y., Radlwimmer, F.B. & Yokoyama, S. Molecular genetics and the evolution of ultraviolet vision in vertebrates. *Proc. Natl Acad. Sci. USA* **98**, 11731-6 (2001).
69. Yokoyama, S., Starmer, W.T., Takahashi, Y. & Tada, T. Tertiary structure and spectral tuning of UV and violet pigments in vertebrates. *Gene* **365**, 95-103 (2006).
70. Fenton, M. B., Faure, P. A. & Ratcliffe, J. M. Evolution of high duty cycle echolocation in bats. *J. Exp. Biol.* **215**, 2935-44 (2012).
71. Al-Regaiey, K. A., Masternak, M. M., Bonkowski, M., Sun, L. & Bartke, A. Long-lived growth hormone receptor knockout mice: interaction of reduced insulin-like growth factor i/insulin signaling and caloric restriction. *Endocrinology* **146**, 851-60 (2005).
72. Masternak, M. M. *et al.* Effects of caloric restriction on insulin pathway gene expression in the skeletal muscle and liver of normal and long-lived GHR-KO mice. *Exp. Gerontol.* **40**, 679-84 (2005).
73. Panici, J. A. *et al.* Is altered expression of hepatic insulin-related genes in growth hormone receptor knockout mice due to GH resistance or a difference in biological life spans? *J. Gerontol. A Biol. Sci. Med. Sci.* **64**, 1126-33 (2009).
74. Hinkley, R.E. & Burton, P.R. Fine structure of the pancreatic islet cells of normal and alloxan treated bats (*Eptesicus fuscus*). *Anat Rec.* **166**, 67-85 (1970).
75. Mosca, L. Changes in the islets of Langerhans associated with age and hibernation. *Exp. Physiol.* **41**, 433-441 (1956).
76. Li, R. *et al.* The sequence and de novo assembly of the giant panda genome. *Nature* **463**, 311-7 (2010).
77. Li, H. & Durbin, R. Fast and accurate short read alignment with Burrows-Wheeler transform. *Bioinformatics* **25**, 1754-60 (2009).
78. Chen, N. Using RepeatMasker to identify repetitive elements in genomic sequences. In *Current protocols in Bioinformatics*, vol. 25, chap. 4 (Wiley, 2009).
79. Kent, W. J. BLAT--the BLAST-like alignment tool. *Genome Res.* **12**, 656-64 (2002).
80. Birney, E., Clamp, M. & Durbin, R. GeneWise and Genomewise. *Genome Res.* **14**, 988-95 (2004).
81. Stanke, M. & Waack, S. Gene prediction with a hidden Markov model and a new intron submodel. *Bioinformatics* **19**, ii215-ii225 (2003)
82. Salamov, A. A. & Solovyev, V. V. Ab initio gene finding in Drosophila genomic DNA. *Genome Res.* **10**, 516-22 (2000).
83. Korf, I. Gene finding in novel genomes. *BMC Bioinformatics* **5**, 59 (2004).

84. Bairoch, A. & Apweiler, R. The SWISS-PROT protein sequence database and its supplement TrEMBL in 2000. *Nucleic Acids Res.* **28**, 45-8 (2000).
85. Ashburner, M. *et al.* Gene ontology: tool for the unification of biology. The Gene Ontology Consortium. *Nat. Genet.* **25**, 25-9 (2000).
86. Mulder, N. & Apweiler, R. InterPro and InterProScan: tools for protein sequence classification and comparison. *Methods Mol Biol.* **396**, 59-70 (2007).
87. Kanehisa, M. & Goto, S. KEGG: kyoto encyclopedia of genes and genomes. *Nucleic Acids Res.* **28**, 27-30 (2000).
88. Li, H. *et al.* TreeFam: a curated database of phylogenetic trees of animal gene families. *Nucleic Acids Res.* **34**, D572-80 (2006).
89. Edgar, R.C. MUSCLE: multiple sequence alignment with high accuracy and high throughput. *Nucleic Acids Res.* **32**, 1792-7 (2004).
90. Huelsenbeck, J.P. & Ronquist, F. MRBAYES: Bayesian inference of phylogenetic trees. *Bioinformatics* **17**, 754-5 (2001).
91. Yang, Z. PAML 4: phylogenetic analysis by maximum likelihood. *Mol. Biol. Evol.* **24**, 1586–1591 (2007).
92. Yang, Z. & Rannala, B. Bayesian estimation of species divergence times under a molecular clock using multiple fossil calibrations with soft bounds. *Mol. Biol. Evol.* **23**, 212-26 (2006).
93. Hahn, M.W., De Bie, T., Stajich, J.E., Nguyen, C. & Cristianini, N. Estimating the tempo and mode of gene family evolution from comparative genomic data. *Genome Res.* **15**, 1153-60 (2005).
94. Yu, X. J., Zheng, H. K., Wang, J., Wang, W. & Su, B. Detecting lineage-specific adaptive evolution of brain-expressed genes in human using rhesus macaque as outgroup. *Genomics* **88**, 745-51 (2006).
95. Lindblad-Toh, K. *et al.* A high-resolution map of human evolutionary constraint using 29 mammals. *Nature* **478**, 476-82 (2011).
96. Miller, W. *et al.* 28-way vertebrate alignment and conservation track in the UCSC Genome Browser. *Genome Res.* **17**, 1797-808 (2007).
97. Sayers, E. W. *et al.* Database resources of the National Center for Biotechnology Information. *Nucleic Acids Res.* **40**, D13-25 (2012).
98. Larkin, M. A. *et al.* Clustal W and Clustal X version 2.0. *Bioinformatics* **23**, 2947-8 (2007).
99. Aparicio, S. *et al.* Whole-genome shotgun assembly and analysis of the genome of *Fugu rubripes*. *Science* **297**, 1301-10 (2002).
100. Jaillon, O. *et al.* Genome duplication in the teleost fish *Tetraodon nigroviridis* reveals the early vertebrate proto-karyotype. *Nature* **431**, 946-57 (2004).
101. Kasahara, M. *et al.* The medaka draft genome and insights into vertebrate genome evolution. *Nature* **447**, 714-9 (2007).
102. Simpson, J. T. & Durbin, R. Efficient de novo assembly of large genomes using compressed data structures. *Genome Res.* **22**, 549-56 (2012).
103. Karolchik, D. *et al.* The UCSC Table Browser data retrieval tool. *Nucleic Acids Res.* **32**, D493-6 (2004).
104. Fletcher, W. & Yang, Z. The effect of insertions, deletions, and alignment errors on the branch-site test of positive selection. *Mol. Biol. Evol.* **27**, 2257-67 (2010).
105. Markova-Raina, P. & Petrov, D. High sensitivity to aligner and high rate of false positives in the estimates of positive selection in the 12 *Drosophila* genomes. *Genome Res.* **21**, 863-74 (2011).
106. Vamathevan, J. J. *et al.* The role of positive selection in determining the molecular cause of species

- differences in disease. *BMC Evol. Biol.* **8**, 273 (2008).
107. Loytynoja, A. & Goldman, N. Phylogeny-aware gap placement prevents errors in sequence alignment and evolutionary analysis. *Science* **320**, 1632-5 (2008).
  108. Castresana, J. Selection of conserved blocks from multiple alignments for their use in phylogenetic analysis. *Mol. Biol. Evol.* **17**, 540-52 (2000).
  109. Talavera, G. & Castresana, J. Improvement of phylogenies after removing divergent and ambiguously aligned blocks from protein sequence alignments. *Syst. Biol.* **56**, 564-77 (2007).
  110. Stajich, J.E. *et al.* The Bioperl toolkit: Perl modules for the life sciences. *Genome Res.* **12**, 1611-8 (2002).
  111. Lupas, A., Van Dyke, M. & Stock, J. Predicting coiled coils from protein sequences. *Science* **252**, 1162-4 (1991).
  112. Zhang, B., Kirov, S. & Snoddy, J. WebGestalt: an integrated system for exploring gene sets in various biological contexts. *Nucleic Acids Res.* **33**, W741-8 (2005).
  113. Brawand, D. *et al.* The evolution of gene expression levels in mammalian organs. *Nature* **478**, 343-8 (2011).
  114. Mortazavi, A., Williams, B. A., McCue, K., Schaeffer, L. & Wold, B. Mapping and quantifying mammalian transcriptomes by RNA-Seq. *Nat. Methods* **5**, 621-8 (2008).
  115. Robinson, M. D., McCarthy, D. J. & Smyth, G. K. edgeR: a Bioconductor package for differential expression analysis of digital gene expression data. *Bioinformatics* **26**, 139-40 (2010).
